# Supplementary material for: Spatio-temporal dengue risk modelling in the south of Thailand: a Bayesian approach to dengue vulnerability
Source: PeerJ. 2023 Jul 14;11:e15619. doi: 10.7717/peerj.15619 (PMC10351518; doi:10.7717/peerj.15619)
Supplement: Supplemental Information 2 [file peerj-11-15619-s002.xlsx]

## Sheet: Sheet1
District	Year	Month	Temperature	Rhumidity	Rainfall	NumRainyDays	Windspeed	PanEvaporation	CloudVolume	SealevelPressure	Population	DengueCases
1	2002	1	26.1418	80.44	28.6146	11.3859	2.6941	118.255	6.40067	1012.11	264507	83
1	2002	2	26.5329	77.4699	1.36035	1.10076	2.74334	138.209	5.17456	1012.95	264507	73
1	2002	3	27.5015	77.2386	71.6773	7.68909	2.20451	172.495	4.92459	1010.17	264507	63
1	2002	4	28.1508	79.0596	78.9105	8.09303	1.81418	151.705	5.9776	1008.79	264507	96
1	2002	5	28.0911	80.6865	112.767	13.857	1.4224	133.663	6.73506	1008.35	264507	170
1	2002	6	28.2	79.7687	138.696	13.8493	1.03658	121.236	7.24626	1008.03	264507	258
1	2002	7	28.2575	77.3658	97.7915	13.0095	1.47614	150.266	6.73731	1008.45	264507	208
1	2002	8	27.5604	78.6792	160.867	15.665	1.38284	128.159	7.89702	1008.79	264507	132
1	2002	9	27.3552	81.1942	129.62	13.1189	1.15149	122.743	7.48284	1009.73	264507	103
1	2002	10	27.1545	84.112	207.199	15.9923	1.14029	127.315	6.99775	1009.81	264507	115
1	2002	11	26.3537	86.5447	663.546	22.2265	1.12538	90.2409	7.85819	1010.18	264507	112
1	2002	12	26.7023	85.2313	622.675	20.4108	1.76494	99.6777	7.32459	1011.23	264507	100
1	2003	1	26.6135	81.1789	168.763	13.9156	1.72916	115.79	6.02307	1011.97	264903	39
1	2003	2	27.2963	77.552	23.1139	6.79757	2.54109	130.116	5.2507	1011.12	264903	27
1	2003	3	27.9418	78.3208	126.966	11.907	2.2336	148.879	5.68728	1010.2	264903	32
1	2003	4	28.5679	76.2313	30.432	4.8157	1.36269	168.573	5.11193	1008.9	264903	14
1	2003	5	28.1284	81.3134	176.763	14.0172	1.16494	133.045	7.80669	1008.02	264903	33
1	2003	6	27.8142	80.9702	140.906	13.2188	1.15374	134.577	6.75222	1008.35	264903	28
1	2003	7	27.403	82.2836	123.704	15.8829	1.17389	121.313	8.15447	1008.83	264903	29
1	2003	8	27.8977	80.8807	90.508	11.9836	1.41716	130.996	7.50597	1008.61	264903	20
1	2003	9	27.2948	83.4254	173.762	18.4462	1.02538	124.824	8.03506	1009.28	264903	12
1	2003	10	26.3343	87.4851	388.314	22.2274	0.859708	92.2205	8.64029	1009.84	264903	29
1	2003	11	26.3508	86.3731	462.857	16.4031	1.07091	98.7693	7.12459	1010.37	264903	22
1	2003	12	25.5873	83.9775	578.512	19.982	2.07243	94.0916	7.52532	1011.86	264903	9
1	2004	1	26.6329	80.2386	54.6386	11.7976	2.21498	127.738	5.78722	1011.57	256178	9
1	2004	2	26.7388	79.1789	126.94	7.57968	2.29258	121.139	6.28125	1011.37	256178	9
1	2004	3	27.8418	78.776	39.3207	6.25239	2.02836	148.812	6.09099	1009.95	256178	8
1	2004	4	28.5769	78.1716	38.7389	4.70629	1.70597	150.728	6.41339	1009.23	256178	3
1	2004	5	28.2828	78.9403	106.823	12.4462	1.72538	137.696	7.52982	1008.44	256178	7
1	2004	6	27.7209	79.1047	98.4932	12.8829	1.32763	125.138	7.69477	1009.14	256178	10
1	2004	7	27.1694	82.1643	143.122	14.9587	1.06196	127.436	8.15673	1008.66	256178	23
1	2004	8	27.6231	80.5374	103.98	15.0766	1.26421	127.786	7.86117	1008.78	256178	23
1	2004	9	26.9515	83.9105	179.646	15.0672	1.25673	124.716	7.94327	1009.85	256178	16
1	2004	10	26.5881	84.3135	249.802	24.6047	1.3448	108.38	7.59324	1010.95	256178	35
1	2004	11	26.7105	84.9477	339.958	23.3773	1.70974	107.348	7.02008	1010.79	256178	37
1	2004	12	26.0761	82.6342	197.91	13.6883	2.07468	108.294	6.69696	1011.18	256178	23
1	2005	1	26.2127	78.8655	73.7999	7.12578	2.40676	130.042	5.31187	1011.66	256740	22
1	2005	2	27.1694	75.3804	0.875939	0.0671704	2.53287	148.735	3.93427	1011.74	256740	22
1	2005	3	27.5097	77.6939	178.914	8.23518	2.22617	159.257	4.71637	1011.38	256740	16
1	2005	4	28.9933	75.7164	13.6982	3.9078	1.85076	168.879	4.84102	1010.23	256740	6
1	2005	5	28.3716	80.224	138.12	14.2696	1.16793	134.871	7	1008.15	256740	30
1	2005	6	28.1746	79.6494	154.321	13.3454	1.12763	120.178	6.85819	1007.62	256740	57
1	2005	7	27.8403	79.336	128.164	14.429	1.22465	127.264	7.83208	1008.81	256740	105
1	2005	8	28.0089	78.4778	95.4683	15.0259	1.556	136.687	7.65819	1008.66	256740	112
1	2005	9	27.6858	80.7091	147.035	13.8406	0.941815	115.07	7.68655	1008.97	256740	59
1	2005	10	26.4687	86.7687	344.228	23.3531	1.00524	93.4453	8.47164	1009.86	256740	72
1	2005	11	26.3142	86.6269	623.091	15.807	1.39404	81.3695	8	1009.96	256740	73
1	2005	12	25.0366	89.5447	745.974	23.3695	1.63287	61.7564	8.54474	1010.22	256740	47
1	2006	1	26.2943	84	153.446	13.3695	1.00943	85.0867	6	1010.75	258167	59
1	2006	2	26.7981	83.4906	275.631	13.6133	1.66226	94.9697	6	1011.17	258167	36
1	2006	3	27.5981	80.4906	43.8651	8.36952	1.36226	124.93	5	1009.44	258167	24
1	2006	4	27.8491	82.4906	113.165	16.6469	0.713204	122.266	5.50943	1008.73	258167	28
1	2006	5	27.4509	84.4906	178.176	16.3704	0.9	97.6452	7	1008.89	258167	35
1	2006	6	27.6019	83.4906	252.164	18.5547	1.29811	111.298	7.50943	1008.28	258167	27
1	2006	7	27.9528	79	80.0016	17.379	1.39434	116.957	7.50943	1008.37	258167	12
1	2006	8	27.7981	78.5094	193.071	17.4539	0.850943	123.264	7.50943	1008.35	258167	5
1	2006	9	27.2491	83	229.688	20.0672	0.950943	102.315	7.50943	1009.56	258167	5
1	2006	10	26.8981	84.4906	259.599	17.7821	0.849057	133.444	7	1010.86	258167	6
1	2006	11	26.9962	86	355.96	20.7227	0.854716	78.232	6.49057	1010.21	258167	11
1	2006	12	26.4453	84.4906	315.844	19.9656	2.00943	76.3999	7	1011.18	258167	15
1	2007	1	26.0962	84.9811	160.772	15.4867	1.60943	75.5282	7	1012.5	258668	15
1	2007	2	26.4943	79.5094	8.75413	3.68044	1.60943	111.979	4.49057	1011.74	258668	15
1	2007	3	27.6472	78.5094	121.95	7.70629	1.41132	135.826	5	1009.97	258668	14
1	2007	4	28.3	81.4906	158.224	12.286	1.36226	128.336	5	1009.71	258668	11
1	2007	5	27.7	84.4906	278.628	23.739	0.954716	99.8207	7	1008.54	258668	22
1	2007	6	28.1528	82.4717	176.607	14.3032	1.1	108.566	7	1007.19	258668	23
1	2007	7	27.7528	80.4717	135.213	21.429	1.44717	103.657	7.50943	1008.41	258668	23
1	2007	8	27.9528	77.4717	107.074	14.2696	1.94717	123.977	7	1008.16	258668	10
1	2007	9	27.7	80.4906	165.094	18.5969	1.35094	111.336	6.50943	1008.32	258668	16
1	2007	10	26.4491	86.4906	388.871	24.4039	1.20377	76.4924	7.50943	1009.2	258668	9
1	2007	11	26.0453	85.4906	534.092	19.0835	1.10566	74.6622	7	1010.04	258668	17
1	2007	12	26.2453	83.4906	237.058	14.9156	1.40755	85.8508	6	1010.23	258668	28
1	2008	1	26.1962	85	321.671	12.1171	0.907545	84.9791	6	1010.84	259234	28
1	2008	2	26.4491	80.4906	76.3917	8.1843	1.50943	98.715	6	1011.36	259234	12
1	2008	3	27.2	81.4906	97.8949	10.286	1.26037	118.509	5	1009.74	259234	19
1	2008	4	27.7981	81	155.619	10.1938	0.611318	115.158	5.50943	1008.32	259234	14
1	2008	5	27.7509	82.4906	197.86	21.0422	0.849057	104.268	7	1008.11	259234	47
1	2008	6	27.8019	80.9811	112.614	16.1938	1.19623	102.243	7	1008.31	259234	57
1	2008	7	27.8038	80.4717	108.509	14.2945	1.29245	115.47	7	1008.05	259234	39
1	2008	8	27.8	80.4717	140.719	16.2275	0.996227	124.757	6.49057	1008.08	259234	34
1	2008	9	27.5019	81.4717	140.821	13.6141	1.29245	99.7585	7	1008.65	259234	24
1	2008	10	27.2	85.4717	231.564	21.1094	0.850943	99.3018	7	1009.22	259234	36
1	2008	11	25.8	90.4717	1019.35	22.05	1.10566	67.9018	8	1009.15	259234	24
1	2008	12	25.5491	87.4717	227.365	15.025	1.50566	72.9377	7	1010.61	259234	24
1	2009	1	25.3	83.4717	156.167	8.87339	1.75283	88.8113	6	1012.22	258618	11
1	2009	2	26.7509	79.9623	11.7216	1.42032	1.25472	103.815	5	1009.88	258618	30
1	2009	3	27.4	82.9623	116.353	13.6727	1.30566	113.973	6	1009.57	258618	19
1	2009	4	27.9	83.9623	264.569	12.8406	0.805659	103.109	6.49057	1008.48	258618	17
1	2009	5	27.9491	84.4717	197.365	21.4118	0.8	100.751	7	1007.31	258618	44
1	2009	6	29.1019	76.4528	37.8745	9.55466	1.59245	134.221	5.50943	1007.96	258618	31
1	2009	7	28.1528	80.4528	120.635	15.9242	1.39057	116.632	7	1008.2	258618	21
1	2009	8	28.0981	79.4717	168.645	18.5384	1.38868	119.451	7	1007.96	258618	20
1	2009	9	27.9	80.4717	163.555	16.6055	1.34528	113.304	7	1008.52	258618	18
1	2009	10	27.2	84.4717	104.222	17.6055	0.998114	98.0585	7	1009.43	258618	13
1	2009	11	26.9491	85.4528	414.185	13.6555	1.94717	84.5886	7	1009.71	258618	9
1	2009	12	26.2981	85.9811	189.466	12.8062	1.25094	86.5075	6	1011.33	258618	9
1	2010	1	26.6	84.9623	143.644	11.764	1.40189	101.977	6	1011.91	259436	31
1	2010	2	27.1509	80.9623	15.6692	3.72267	1.3566	118.33	4.49057	1011.29	259436	27
1	2010	3	27.8509	79.9623	75.5542	6.13434	1.4566	130.385	5	1010.78	259436	31
1	2010	4	28.9509	79.9623	33.0819	7.15164	1.10566	136.517	5	1009.61	259436	26
1	2010	5	29.5528	78.9623	122.935	12.3445	1.10377	138.77	6	1007.25	259436	40
1	2010	6	28.5509	80.4717	175.338	14.9923	0.998114	112.46	7	1008.11	259436	57
1	2010	7	27.8509	81.4717	148.124	15.3704	1.0434	101.013	7	1008.09	259436	127
1	2010	8	28	80.9811	132.55	15.6305	1.19623	115.008	7	1008.17	259436	146
1	2010	9	27.4019	84.4717	137.767	22.7821	0.856602	100.009	7	1008.52	259436	118
1	2010	10	27.1491	84.9811	275.652	19.8406	1.10189	92.7792	7.50943	1008.06	259436	96
1	2010	11	25.7981	91.4717	922.163	27.4031	0.950943	69.6698	8	1008.94	259436	73
1	2010	12	25.9472	88.9623	444.704	19.4031	0.65283	74.3868	7	1008.62	259436	45
1	2011	1	25.4472	88.4717	495.955	22.4031	1.15283	72.0113	7.50943	1010.2	259213	35
1	2011	2	26.7	82.4528	38.9331	3.73988	1.40943	96.0075	6	1010.18	259213	21
1	2011	3	26.4	87.4528	1348.82	18.7898	2.01132	80.0396	7	1009.25	259213	22
1	2011	4	27.8472	81.9811	90.0951	7.98362	1.2566	117.196	5.50943	1009.42	259213	16
1	2011	5	28.3	82.4717	176.881	17.2437	1.34906	123.755	7	1008.33	259213	12
1	2011	6	28.3509	80.9623	123.411	14.8829	1.64151	113.957	7	1007.63	259213	6
1	2011	7	27.8019	81.9623	107.995	13.807	1.88868	108.347	7.49057	1007.87	259213	8
1	2011	8	27.5509	81.9623	200.073	19.0336	1.54528	117.121	8	1008.48	259213	9
1	2011	9	27.4509	82.9623	127.881	16.143	1.73963	105.909	8	1008.87	259213	8
1	2011	10	26.8	87.4717	323.38	20.857	1.34528	93.8151	7.49057	1009.16	259213	8
1	2011	11	26.5981	87.4717	425.397	20.8485	1.89811	89.0226	7.49057	1009.33	259213	11
1	2011	12	25.7962	87.9623	354.336	20.5961	2.29623	74.9924	8	1010.32	259213	8
1	2012	1	26.0472	86.9811	882.66	17.8062	1.85094	80.3566	7.49057	1010.33	259989	13
1	2012	2	27.1	82.4717	13.4629	5.49614	1.90566	107.734	5.49057	1009.47	259989	15
1	2012	3	27.7	81.4717	128.739	14.2688	1.50566	124.458	6.49057	1009.31	259989	5
1	2012	4	28.1019	82.4528	75.013	12.1938	1.50755	116.306	7	1009.06	259989	11
1	2012	5	28.6038	78.9434	83.4448	13.3281	1.99434	130.645	7	1007.36	259989	17
1	2012	6	28.6038	76.434	77.3765	8.66406	2.43963	133.379	7	1007.75	259989	28
1	2012	7	28.4528	76.9434	90.8173	8.82426	2.39245	126.655	7	1007.75	259989	25
1	2012	8	28.5	77.9623	153.381	9.91645	2.29245	144.794	7	1008.68	259989	37
1	2012	9	27.4981	83.4717	150.769	20.8829	1.89057	100.991	8	1009.19	259989	53
1	2012	10	26.8491	87.4717	235.125	19.4453	1.5	91.7887	7	1009.89	259989	82
1	2012	11	26.8491	89.4717	325.758	20.8062	1.25283	72.7717	7.49057	1009.65	259989	108
1	2012	12	26.7	87.9811	392.964	16.2265	1.74906	76.0962	7.49057	1009.81	259989	123
1	2013	1	26.5981	85.9811	75.4158	10.3359	1.75283	86.5471	7	1011.7	260820	139
1	2013	2	26.6491	84.9811	141.459	10.3695	1.95283	92.732	7.49057	1010.7	260820	72
1	2013	3	27.9	82.4717	8.4657	3.03359	1.55283	131.062	5.49057	1010.54	260820	59
1	2013	4	28.4	82.9811	253.683	10.5633	1.15094	119.449	6.49057	1008.44	260820	53
1	2013	5	28.2981	84.4906	264.354	16.4625	1.14906	117.189	7.49057	1008.13	260820	39
1	2013	6	28.3509	81.9811	101.927	14.2945	2.08114	104.134	7.49057	1006.94	260820	52
1	2013	7	27.4491	82.9811	143.469	17.2102	1.83208	100.5	8	1007.8	260820	50
1	2013	8	27.6981	81.4906	135.647	14.7485	2.17925	126.8	7	1008.31	260820	32
1	2013	9	27.7	81.4717	101.385	13.9165	2.23019	109.343	7.49057	1008.63	260820	20
1	2013	10	26.7491	86.9811	208.486	23.6469	1.44151	91.9094	7.49057	1010.16	260820	9
1	2013	11	26.6472	88.4906	892.103	20.1258	1.89245	79.1453	7.49057	1009.27	260820	12
1	2013	12	25.9962	86	292.34	13.5625	3.02265	84.9774	7.49057	1010.68	260820	22
1	2014	1	25.5491	83.9811	215.551	10.6968	2.19623	92.5452	7.49057	1012.88	261911	10
1	2014	2	25.8472	80.4717	1.27382	1.64685	2.00377	108.7	4.98114	1011.17	261911	11
1	2014	3	27.2491	79.4717	3.52302	0.596891	1.90566	148.687	4.49057	1011.28	261911	15
1	2014	4	28.7547	78.9434	36.1068	3.39621	1.70377	143.336	5.98114	1009.49	261911	9
1	2014	5	28.6038	81.9623	196.334	13.9923	1.39811	130.615	6.49057	1008.6	261911	8
1	2014	6	28.7	79.9623	108.177	12.7735	2.68491	113.225	7.49057	1007.11	261911	24
1	2014	7	28.6	78.4717	104.057	17.4798	2.82453	125.045	7.49057	1008.19	261911	42
1	2014	8	27.8491	81.9623	190.155	17.9923	2.0868	122.194	7.49057	1009.15	261911	52
1	2014	9	27.3491	84.4717	134.456	20.3782	1.83963	106.683	7.49057	1009.55	261911	61
1	2014	10	26.8491	87.9811	314.485	23.3359	1.59434	89.8924	7.49057	1010.13	261911	86
1	2014	11	26.7491	89.9811	377.365	21.4367	1.39811	66.417	7.49057	1010.18	261911	83
1	2014	12	26.4491	88.4717	546.357	22.9828	2.4434	69.0924	7.49057	1010.84	261911	29
1	2015	1	26.0981	85.4717	60.0395	10.5202	2.0434	91.7321	6.49057	1012.69	262880	35
1	2015	2	25.8	82.4528	14.9274	1.96641	2.19623	101.43	4.98114	1012.54	262880	29
1	2015	3	27.6019	80.4717	1.17345	1.03359	2.1	139.37	4.98114	1011.96	262880	23
1	2015	4	28.5	81.4717	101.862	7.52972	1.6	132.17	5.98114	1010.11	262880	16
1	2015	5	28.7509	80.9623	77.7742	13.1102	1.54528	136.408	6.49057	1009.3	262880	15
1	2015	6	28.2509	82.4717	81.3217	12.2188	1.63963	108.077	7.49057	1008.75	262880	22
1	2015	7	28.3	79.9623	125.503	15.5556	2.62642	121.498	7	1008.95	262880	23
1	2015	8	27.5	84.4717	226.661	17.3118	1.73774	104.681	7.49057	1009.48	262880	15
1	2015	9	27.4491	85.4717	168.177	19.1516	1.5868	102.728	7.49057	1009.96	262880	20
1	2015	10	27.1491	87.9811	306.331	19.5882	1.24151	88.3604	7.49057	1011.19	262880	41
1	2015	11	26.5981	91.4906	524.113	25	1.39245	59.8019	7.49057	1010.46	262880	31
1	2015	12	26.7472	88.4906	339.444	18.8062	1.84528	83.1566	6.49057	1012.19	262880	49
1	2016	1	27.1981	85.9811	99.4798	10.9156	1.89811	98.2283	5.49057	1012.41	263094	48
1	2016	2	26.7981	84.4717	100.014	8.98279	2.64906	93.5981	6.49057	1012.96	263094	38
1	2016	3	27.9	80.9811	0	0	1.95472	137.124	4.49057	1011.87	263094	24
1	2016	4	29.7509	77.9811	2.00948	2.96641	1.94717	161.743	4.49057	1009.48	263094	7
1	2016	5	29.3528	80.9811	74.7295	12.7821	2.09245	138.266	6.49057	1008.46	263094	8
1	2016	6	28.4019	81.4906	129.227	14.2437	1.79057	117.27	7.49057	1009.03	263094	10
1	2016	7	27.7491	84.9811	220.002	17.9751	1.6434	107.698	7.49057	1008.66	263094	32
1	2016	8	28.3509	81.4717	78.7868	18.3454	2.67548	116.992	7	1007.8	263094	40
1	2016	9	28.0491	81.4906	139.988	19.5806	2.62642	121.208	7.49057	1008.77	263094	66
1	2016	10	27.3	86.9811	279.987	23.261	2.23208	88.4622	7.49057	1008.67	263094	81
1	2016	11	27.1491	90.4906	322.465	22.0328	1.74151	82.7849	7.49057	1009.86	263094	75
1	2016	12	26.0962	90.4906	966.748	21.5202	2.43585	56.9094	7.49057	1010.21	263094	105
1	2017	1	25.7472	91.9811	1503.75	24.9492	2.2434	55.6735	8	1010.53	263649	75
1	2017	2	26.4981	85.4717	99.0342	10.7563	2.14528	89.7641	6.49057	1011.99	263649	90
1	2017	3	27.5	82.9811	85.3663	7.59689	2.0434	116.028	5.49057	1010.53	263649	69
1	2017	4	27.7962	85.9811	179.67	12.4462	1.89245	105.645	6	1009.79	263649	72
1	2017	5	28.6491	83.4717	103.505	15.7907	2.18491	112.847	6.98114	1008.28	263649	76
1	2017	6	28.6981	80.4906	142.509	13.1266	2.07548	128.64	6.49057	1008.68	263649	77
1	2017	7	28.2491	81.9811	104.947	15.9836	2.17736	108.625	7.49057	1008.76	263649	64
1	2017	8	28.1	82.9811	165.073	19.3954	2.22831	121.387	7	1008.36	263649	81
1	2017	9	27.7491	85	157.786	17.8915	1.7868	101.228	7.49057	1009.11	263649	69
1	2017	10	27.7	85.4906	127.928	15.0758	1.78491	107.264	6.98114	1009.2	263649	60
1	2017	11	26.6	89.9811	907.57	23.0336	2.4868	75.3019	7.49057	1008.6	263649	80
1	2017	12	26.0472	88.4906	516.524	16.4367	2.78114	73.683	7.49057	1010.78	263649	74
1	2018	1	26.1491	88.4906	224.28	17.1094	1.59623	78.0848	7.49057	1009.76	264307	53
1	2018	2	26.5509	81.9811	14.9669	3.96641	2.05094	105.372	4.98114	1011.82	264307	49
1	2018	3	27.7019	81.4717	99.2432	4.59689	2.00189	134.836	4.98114	1010.16	264307	59
1	2018	4	28	82.9811	80.2135	9.38673	1.79811	118.715	5.49057	1009.31	264307	47
1	2018	5	27.9491	85.4717	146.018	12.9001	1.34528	105.164	6.49057	1008.93	264307	72
1	2018	6	28.0491	82.4717	123.944	16.0594	1.93963	109.506	7.49057	1008.61	264307	78
1	2018	7	28.5491	78.9623	117.409	16.1688	3.06982	122.734	6.49057	1007.72	264307	102
1	2018	8	28.4472	80.4717	80.8866	14.093	3.06982	113.585	7	1008.11	264307	138
1	2018	9	27.4	83.9811	188.298	20.261	1.93774	105.166	6.49057	1009.33	264307	102
1	2018	10	27.1491	87.4906	313.197	21.5297	1.6434	92.8094	6.49057	1010.66	264307	101
1	2018	11	26.5509	89.9811	187.873	8.57968	1.79434	30.1736	7	1009.94	264307	154
1	2018	12	26.8472	89.4906	624.242	21.6133	1.64906	86.934	7	1010.91	264307	146
2	2002	1	26.1	82	38.9	13	2.7	111.7	7.1	1012.05	33026	0
2	2002	2	26.4	79	0.1	1	2.8	131.9	5.5	1012.98	33026	0
2	2002	3	26.5	79	94.8	8	2.4	174.5	5.2	1010.14	33026	1
2	2002	4	25.9	79	68.6	7	2.1	157.5	6.3	1008.55	33026	2
2	2002	5	26	80	102.9	14	1.6	138.3	6.8	1008.03	33026	19
2	2002	6	25.9	78	149.7	13	1.1	128.3	7.4	1007.89	33026	33
2	2002	7	26	74	87.5	11	1.6	163.8	6.7	1008.13	33026	30
2	2002	8	25.3	76	175.2	14	1.6	139.5	8.1	1008.57	33026	25
2	2002	9	26.6	79	97.2	11	1.4	134.7	7.6	1009.55	33026	33
2	2002	10	25.3	83	213.3	15	1.4	132.4	7.1	1009.66	33026	23
2	2002	11	25.9	87	810.4	23	1.3	85.9	8	1010.3	33026	1
2	2002	12	26.5	86	807.7	22	2	97.3	7.6	1010.97	33026	1
2	2003	1	25.5	82	239.3	15	1.6	114.8	6.5	1012.52	32958	0
2	2003	2	26	79	18.2	8	2.6	133.4	6.1	1011.27	32958	1
2	2003	3	27.1	80	142.2	13	2.4	158.2	6.3	1010.29	32958	0
2	2003	4	25.6	77	36.2	4	1.4	172.9	5.5	1008.88	32958	0
2	2003	5	26.1	80	167	13	1.2	135.5	7.9	1007.79	32958	4
2	2003	6	26.2	80	163.8	13	1.2	143.8	7.1	1008.11	32958	6
2	2003	7	27.1	81	116.3	15	1.2	127.6	8.3	1008.54	32958	2
2	2003	8	26.5	79	66	11	1.6	144.6	7.7	1008.28	32958	2
2	2003	9	26.7	82	175.7	17	1.1	135.7	8.1	1008.98	32958	0
2	2003	10	26.7	87	390	21	0.9	99.1	8.7	1009.72	32958	0
2	2003	11	26.2	87	565.8	17	1.1	101.2	7.6	1010.48	32958	0
2	2003	12	26.4	85	751.1	23	2.1	92	8.2	1012.08	32958	0
2	2004	1	26.8	82	61.3	13	2.3	128.6	6.9	1011.87	32808	0
2	2004	2	27.2	81	180.3	8	2.4	117.5	7.2	1011.63	32808	0
2	2004	3	26.7	80	35.9	6	2.3	150.6	6.6	1010.08	32808	0
2	2004	4	27.1	78	36.3	4	2	159.6	6.8	1009.26	32808	0
2	2004	5	26.6	77	117.1	11	1.9	147.7	7.8	1008.29	32808	0
2	2004	6	25.7	76	93.5	12	1.3	139	7.8	1008.89	32808	2
2	2004	7	25.8	80	102.3	14	1.1	142.6	8.1	1008.45	32808	0
2	2004	8	26.7	78	82.1	13	1.2	140.1	8	1008.53	32808	4
2	2004	9	26.4	83	177.2	15	1.4	133.7	8	1009.75	32808	2
2	2004	10	26.6	84	258.9	26	1.4	112.6	7.8	1010.96	32808	3
2	2004	11	27.3	86	421.1	25	1.7	110.2	7.5	1010.93	32808	4
2	2004	12	27.7	84	283.8	16	2	108.1	7.3	1011.37	32808	0
2	2005	1	27.6	81	85.7	8	2.5	127.9	5.9	1011.92	32957	0
2	2005	2	27.1	78	0	0	2.7	145.6	4.5	1011.92	32957	2
2	2005	3	27.5	80	241.5	9	2.2	157.7	5	1011.6	32957	0
2	2005	4	27.5	77	12.4	3	2	172.9	5	1010.33	32957	0
2	2005	5	27.2	79	132.2	13	1.2	147.4	7	1007.98	32957	0
2	2005	6	27.4	77	121.2	12	1.1	135.8	7	1007.38	32957	7
2	2005	7	27.9	77	147.1	14	1.2	135.2	8	1008.57	32957	20
2	2005	8	26.4	76	65.2	14	1.6	147.6	7.8	1008.43	32957	19
2	2005	9	27.7	79	136.5	13	0.9	123.5	8	1008.75	32957	24
2	2005	10	27.9	86	384.4	23	1.1	95.5	8.5	1009.77	32957	8
2	2005	11	27.2	86	643.1	15	1.6	82	8	1009.95	32957	13
2	2005	12	27.7	90	927.9	24	1.7	55.9	9	1010.34	32957	10
2	2006	1	27.9	84	194.3	14	1.5	102.6	6	1010.75	33024	8
2	2006	2	27.5	83	322.2	14	2.3	111.6	6	1011.18	33024	1
2	2006	3	27.8	80	48.2	9	2	147.3	5	1009.42	33024	3
2	2006	4	28.3	82	96.5	17	1.4	143.9	6	1008.53	33024	2
2	2006	5	28.4	84	177.3	15	0.9	115.6	7	1008.72	33024	1
2	2006	6	28.6	83	297.6	19	1.2	132	8	1008.08	33024	0
2	2006	7	28.7	79	38.9	16	1.1	117.3	8	1008.14	33024	0
2	2006	8	27.8	79	211	17	0.9	139.6	8	1008.23	33024	1
2	2006	9	28.3	83	224.3	20	1	123.9	8	1009.41	33024	0
2	2006	10	27.7	84	340.3	17	0.8	109.7	7	1010.72	33024	0
2	2006	11	27.9	86	417.8	21	1.1	105.9	6	1010.1	33024	0
2	2006	12	29	84	422.5	22	2.5	99.8	7	1011.08	33024	0
2	2007	1	27.7	84	211.4	17	2.1	92.6	7	1012.49	33084	0
2	2007	2	28.2	80	5.7	4	2.1	131.7	4	1011.78	33084	0
2	2007	3	28.4	79	133.6	7	2	155.4	5	1009.98	33084	3
2	2007	4	29	81	173.4	12	2	151	5	1009.66	33084	7
2	2007	5	28.5	84	261.9	25	1.2	121.7	7	1008.54	33084	2
2	2007	6	29.8	81	188	13	1.1	127.6	7	1007.11	33084	0
2	2007	7	27.6	79	126.8	21	1.3	124.8	8	1008.37	33084	1
2	2007	8	28	76	104.2	13	1.8	143.6	7	1008.02	33084	0
2	2007	9	28.3	80	160.2	18	1.4	123.6	7	1008.36	33084	0
2	2007	10	28.3	86	316	23	1.4	96.9	8	1009.21	33084	0
2	2007	11	28.5	85	619.5	20	1.4	93.5	7	1010.1	33084	1
2	2007	12	28.5	83	297.9	16	1.8	109.3	6	1010.29	33084	0
2	2008	1	27.5	85	455.8	13	1.3	107.3	6	1010.97	33241	0
2	2008	2	27.7	80	88.5	9	2	117.7	6	1011.42	33241	1
2	2008	3	27.8	81	97.5	10	1.8	142.4	5	1009.84	33241	3
2	2008	4	27.9	81	171.7	9	1.2	136.4	6	1008.36	33241	0
2	2008	5	29.7	82	180.1	21	0.8	126	7	1008.12	33241	6
2	2008	6	28.3	80	50.7	15	1	117.5	7	1008.48	33241	8
2	2008	7	28.8	79	89.8	13	0.9	132.1	7	1008.34	33241	6
2	2008	8	28.2	79	176.8	16	0.8	138.1	6	1008.38	33241	3
2	2008	9	28.8	80	140.6	12	0.9	108	7	1008.91	33241	0
2	2008	10	28.8	84	287.2	21	0.9	117.6	7	1009.5	33241	6
2	2008	11	29.5	89	1207.6	23	1.4	94	8	1009.53	33241	0
2	2008	12	28.6	86	305.1	16	1.8	87.9	7	1010.89	33241	2
2	2009	1	27.9	82	217.6	10	1.9	102.4	6	1012.26	33338	3
2	2009	2	28.4	78	13.7	1	1.5	120.2	5	1009.92	33338	1
2	2009	3	27.9	81	104	13	1.6	136	6	1009.62	33338	3
2	2009	4	28.1	82	319.2	12	1.1	116.6	6	1008.49	33338	1
2	2009	5	28.4	83	227.9	22	0.8	119	7	1007.31	33338	1
2	2009	6	27.7	74	22.3	9	1.2	145.7	6	1007.88	33338	1
2	2009	7	28.3	78	117.6	16	0.9	136.5	7	1008.12	33338	1
2	2009	8	27.9	78	151.1	18	0.8	132.5	7	1007.94	33338	1
2	2009	9	29.2	79	172.1	16	1.1	126.5	7	1008.48	33338	0
2	2009	10	28.6	83	96.2	17	0.9	106.3	7	1009.43	33338	0
2	2009	11	28.4	83	486.8	14	1.8	94.4	7	1009.71	33338	3
2	2009	12	28.8	85	247	14	1.3	99.9	6	1011.35	33338	1
2	2010	1	28.4	83	175.4	13	1.5	119	6	1011.95	33424	3
2	2010	2	28.7	79	7.1	4	1.7	127.7	4	1011.29	33424	3
2	2010	3	28.3	78	79.4	6	1.8	147.8	5	1010.79	33424	3
2	2010	4	28.5	78	22.1	7	1.4	145.2	5	1009.59	33424	7
2	2010	5	28.6	77	123.2	12	1.3	150.2	6	1007.2	33424	3
2	2010	6	28	79	175.4	14	0.9	123.4	7	1008.05	33424	17
2	2010	7	28.6	80	132	14	0.7	109.5	7	1008.03	33424	34
2	2010	8	27.6	80	128.9	15	1	120.6	7	1008.12	33424	53
2	2010	9	27.5	83	109.2	22	1.2	113.5	7	1008.51	33424	7
2	2010	10	28	84	272.2	19	1.2	102.1	8	1007.97	33424	7
2	2010	11	28.1	90	1043.3	28	1	73.3	8	1008.88	33424	4
2	2010	12	27.9	87	479.7	20	0.8	78.9	7	1008.61	33424	2
2	2011	1	28	87	571.4	23	1.3	83	8	1010.23	33458	1
2	2011	2	28.3	80	32.8	3	1.9	104.2	6	1010.15	33458	0
2	2011	3	27.9	85	1543.7	19	2.6	87.3	7	1009.19	33458	0
2	2011	4	27.9	81	87.9	7	1.6	127.4	6	1009.41	33458	3
2	2011	5	28.6	81	184.9	17	1.3	134.4	7	1008.27	33458	6
2	2011	6	27.4	79	128.7	14	1.2	116.9	7	1007.53	33458	6
2	2011	7	28.6	80	86.6	13	1.3	105.6	7	1007.78	33458	1
2	2011	8	28.3	80	194.1	19	1.3	120.8	8	1008.4	33458	3
2	2011	9	27.7	81	104	16	1.2	101.2	8	1008.81	33458	1
2	2011	10	28.2	86	370.9	21	1.1	97.2	7	1009.13	33458	0
2	2011	11	28.5	86	491.7	22	1.8	98	7	1009.32	33458	1
2	2011	12	27.8	86	404.9	22	2.1	85	8	1010.34	33458	1
2	2012	1	28.2	86	1067.1	19	1.9	83.3	7	1010.35	33685	0
2	2012	2	27.9	81	8.6	5	2.2	112.1	5	1009.44	33685	1
2	2012	3	28.2	80	143.7	15	1.8	135.3	6	1009.29	33685	1
2	2012	4	27.7	80	52.3	11	1.9	119.2	7	1009.05	33685	2
2	2012	5	28.1	76	39.9	12	1.7	130.4	7	1007.25	33685	0
2	2012	6	27.8	73	56.9	8	1.9	134.9	7	1007.64	33685	8
2	2012	7	28	74	56	7	2	129.5	7	1007.67	33685	4
2	2012	8	28	76	141.1	9	1.9	147.1	7	1008.59	33685	5
2	2012	9	27.6	82	133.5	20	1.4	100.5	8	1009.12	33685	5
2	2012	10	28.5	86	245.5	20	1.5	96.4	7	1009.84	33685	13
2	2012	11	27.6	88	370	22	1.4	79.1	7	1009.64	33685	18
2	2012	12	27.8	87	456.9	17	1.7	91.5	7	1009.84	33685	22
2	2013	1	27.5	85	84.7	11	1.9	91.6	7	1011.75	33791	14
2	2013	2	28.4	84	160.8	11	2.1	99.6	7	1010.71	33791	19
2	2013	3	28.1	81	5.1	3	1.7	139.5	5	1010.53	33791	9
2	2013	4	28.3	82	290	10	1.2	122	6	1008.39	33791	8
2	2013	5	27.6	84	276.5	16	1.1	124.4	7	1008.03	33791	21
2	2013	6	27.5	81	73.4	13	1.1	100.7	7	1006.8	33791	22
2	2013	7	27	82	125.2	17	0.9	97.9	8	1007.67	33791	12
2	2013	8	27.8	81	125.1	14	1.1	126.8	7	1008.18	33791	12
2	2013	9	27.2	80	88.5	13	1.2	109	7	1008.46	33791	10
2	2013	10	27.7	86	218.2	24	1	92.4	7	1010.07	33791	7
2	2013	11	27.6	88	1050.9	21	1.5	84.1	7	1009.22	33791	10
2	2013	12	27.9	86	342.2	15	1.6	83.8	7	1010.64	33791	3
2	2014	1	27.5	83	267.5	12	2	100.1	7	1012.85	34053	4
2	2014	2	27.5	79	1.6	2	2.2	111.3	4	1011.08	34053	4
2	2014	3	27.4	78	0	0	2.2	155.8	4	1011.2	34053	3
2	2014	4	27.7	76	0.3	1	1.9	160.8	5	1009.37	34053	5
2	2014	5	27.3	80	202.2	13	1.3	141.8	6	1008.45	34053	7
2	2014	6	27.4	78	93.7	12	1.9	104.1	7	1006.89	34053	18
2	2014	7	28	77	75.3	16	1.5	122.2	7	1007.94	34053	32
2	2014	8	27.7	80	159.1	17	1.4	129.7	7	1009.02	34053	62
2	2014	9	27.4	83	123.3	21	1.3	98	7	1009.41	34053	58
2	2014	10	27.2	87	337.6	24	1.3	94.7	7	1010.04	34053	41
2	2014	11	26.4	89	418.6	22	1.3	69.9	7	1010.11	34053	26
2	2014	12	26.5	87	639.2	24	2.1	76.5	7	1010.77	34053	14
2	2015	1	26.5	84	69.5	12	1.7	96	6	1012.66	34114	4
2	2015	2	26.8	80	18.3	2	2	108.2	4	1012.49	34114	5
2	2015	3	26.4	79	0.2	1	2.1	145.6	4	1011.86	34114	3
2	2015	4	27.2	80	112.6	7	1.6	146.2	5	1010.02	34114	4
2	2015	5	27.2	79	65.1	11	1.3	144.6	6	1009.16	34114	3
2	2015	6	27.1	81	63	12	1.1	109.5	7	1008.59	34114	8
2	2015	7	26.8	78	96.3	14	1.4	116.2	7	1008.75	34114	9
2	2015	8	26.8	83	214.3	16	1.1	101.1	7	1009.29	34114	16
2	2015	9	26.7	84	145.3	19	0.9	101.6	7	1009.79	34114	6
2	2015	10	26.8	87	326.8	19	0.8	94.1	7	1011.1	34114	2
2	2015	11	27.1	91	579.9	25	1	67.7	7	1010.37	34114	6
2	2015	12	27.3	88	399.7	20	1.6	93.9	6	1012.15	34114	6
2	2016	1	27.7	85	114.7	12	1.8	99.7	5	1012.32	34145	11
2	2016	2	27.1	83	118.3	10	2.6	101.3	6	1012.86	34145	10
2	2016	3	26.3	80	0	0	2.2	143.6	4	1011.75	34145	5
2	2016	4	26.2	77	0	3	1.8	166.6	4	1009.3	34145	3
2	2016	5	26.5	80	44.4	12	1.7	141.7	6	1008.28	34145	0
2	2016	6	26.3	81	114.7	14	1.3	118.3	7	1008.86	34145	1
2	2016	7	26.8	84	140.4	18	1.3	112.8	7	1008.47	34145	7
2	2016	8	25.8	80	37.6	17	1.4	114	7	1007.54	34145	11
2	2016	9	25.8	81	116.1	19	1.4	124.2	7	1008.59	34145	12
2	2016	10	26.9	86	272.3	23	1.3	96.9	7	1008.49	34145	9
2	2016	11	25.7	90	379.5	24	1.3	95	7	1009.78	34145	16
2	2016	12	26.5	90	1110.9	23	1.7	57.4	7	1010.17	34145	14
2	2017	1	26.8	91	1772.7	26	1.9	64.7	8	1010.49	34167	6
2	2017	2	26.5	84	115.3	11	1.9	95.7	6	1011.95	34167	5
2	2017	3	26.7	82	74.6	7	1.7	125.3	5	1010.43	34167	4
2	2017	4	26.5	85	170.6	11	1.5	108	6	1009.7	34167	4
2	2017	5	27.1	82	81.1	14	1.4	112.7	6	1008.11	34167	7
2	2017	6	26.6	80	129.6	12	0.8	133.3	6	1008.53	34167	8
2	2017	7	26.6	81	91.6	15	1	107.3	7	1008.52	34167	9
2	2017	8	26.8	82	150.5	19	1.1	125.9	7	1008.18	34167	10
2	2017	9	25.4	85	126.5	17	1.1	110.5	7	1008.92	34167	8
2	2017	10	25.9	85	123.3	15	1	113.2	6	1009.02	34167	7
2	2017	11	24.9	89	1035	23	1.8	72.8	7	1008.57	34167	15
2	2017	12	26.2	88	607.5	17	1.8	75.4	7	1010.82	34167	4
2	2018	1	26	88	226.6	17	1.4	98.1	7	1009.74	34060	4
2	2018	2	25.5	81	12.4	4	2.1	114.3	4	1011.79	34060	4
2	2018	3	26.2	80	114.7	4	2.1	144.5	4	1010.1	34060	5
2	2018	4	25.8	82	59.1	9	1.7	127.3	5	1009.23	34060	1
2	2018	5	25.6	84	109.5	11	1.1	108.5	6	1008.87	34060	7
2	2018	6	26.7	81	110	15	1.4	112.4	7	1008.5	34060	15
2	2018	7	25.8	77	90.7	15	1.5	119.3	6	1007.57	34060	13
2	2018	8	26.4	79	48.2	13	1.5	112.8	7	1008.03	34060	14
2	2018	9	26.6	83	191.2	20	1.3	111.2	6	1009.28	34060	20
2	2018	10	25.9	87	335.1	21	1.3	98.5	6	1010.62	34060	19
2	2018	11	25.9	89	217.1	9	1.5	31.4	7	1009.96	34060	23
2	2018	12	26.7	89	704.2	22	1.6	88.7	7	1010.87	34060	21
3	2002	1	25.9166	81.1618	18.348	8.83948	1.83236	112.917	6.27141	1012.63	40033	11
3	2002	2	26.667	78.5895	1.47703	1.05414	1.98742	134.096	5.53096	1013.32	40033	4
3	2002	3	27.4494	77.2302	61.5047	7.42128	1.55398	166.301	4.96968	1010.52	40033	7
3	2002	4	27.7258	79.8554	91.6765	10.0572	1.32894	145.453	5.59162	1009.38	40033	12
3	2002	5	27.6526	82.0155	131.296	13.5115	1.01059	126.999	6.84743	1008.87	40033	17
3	2002	6	27.8809	81.8319	129.997	15.5146	0.777766	112.155	7.15273	1008.08	40033	32
3	2002	7	27.7985	81.16	126.168	16.6079	0.9983	139.239	6.84354	1008.77	40033	40
3	2002	8	27.3008	81.1445	192.774	19.0112	1.03049	118.587	7.53811	1008.92	40033	39
3	2002	9	27.2215	83.0605	219.139	17.0784	0.772487	112.591	7.29005	1009.79	40033	38
3	2002	10	27.1344	85.2441	231.016	18.0031	0.807634	125.057	7.00389	1010.02	40033	36
3	2002	11	26.2877	86.3437	496.561	20.9378	0.753355	98.2357	7.9238	1010.1	40033	8
3	2002	12	26.377	84.7636	435.643	17.4412	1.17389	102.035	7.36968	1011.98	40033	7
3	2003	1	26.7205	81.9705	110.958	12.3591	1.29891	107.47	6.12023	1011.22	40055	7
3	2003	2	27.3701	77.8103	15.3242	4.47234	1.95087	115.663	4.49102	1011.15	40055	0
3	2003	3	28.0358	77.4511	87.5799	9.94277	1.77544	128.081	5.14746	1010.26	40055	0
3	2003	4	28.6549	75.7636	31.2482	6.49656	1.25646	168.599	4.63284	1009.04	40055	0
3	2003	5	27.7961	83.1757	209.007	15.6048	0.893007	135.333	7.93219	1008.31	40055	3
3	2003	6	27.6481	82.1679	137.049	13.9409	0.928154	124.684	6.41915	1008.64	40055	8
3	2003	7	27.1237	83.748	143.619	17.5327	1.02131	117.306	7.97481	1009.2	40055	17
3	2003	8	27.5848	82.4805	129.637	13.5868	1.13127	123.335	7.26642	1008.98	40055	9
3	2003	9	27.1016	84.8242	212.613	21.0703	0.812914	121.458	8.14743	1009.63	40055	5
3	2003	10	26.2412	88.084	306.599	24.1294	0.713689	86.9645	8.62675	1010.04	40055	1
3	2003	11	26.4045	85.8398	331.54	15.4443	0.878542	95.9009	6.85057	1010.42	40055	0
3	2003	12	25.5418	84.0389	464.805	15.2035	1.50887	90.2835	7.13767	1011.83	40055	0
3	2004	1	26.4479	80.2302	36.397	9.47234	1.47217	117.804	5.23177	1011.5	39934	5
3	2004	2	26.793	78.3749	82.4704	6.95085	1.64247	120.361	5.96536	1011.3	39934	4
3	2004	3	27.9358	78.1074	62.7665	6.95892	1.53656	148.445	5.95601	1009.97	39934	2
3	2004	4	28.4641	78.5039	49.3426	6.02612	1.30686	145.9	6.34527	1009.31	39934	1
3	2004	5	27.9305	81.3358	107.667	15.0703	1.35336	129.316	7.449	1008.66	39934	0
3	2004	6	27.3611	81.3731	98.5294	14.5327	1.10902	116.773	7.66112	1009.44	39934	0
3	2004	7	26.8695	83.6329	218.256	16.985	0.750239	116.586	8.13048	1008.92	39934	1
3	2004	8	27.2572	83.0683	133.128	18.644	0.946347	118.54	7.96657	1009.08	39934	1
3	2004	9	26.8916	84.3126	151.263	15.0361	0.911363	118.787	7.96952	1010.02	39934	11
3	2004	10	26.5885	84.5801	189.547	22.7804	0.999851	103.376	7.77123	1011.06	39934	7
3	2004	11	26.7778	84.6112	238.403	20.4232	1.25242	99.4466	7.07747	1010.84	39934	4
3	2004	12	26.077	82.0312	134.406	10.2297	1.50498	104.623	6.48198	1011.2	39934	0
3	2005	1	26.2739	77.7948	49.0081	5.88365	1.75009	127.486	5.29582	1011.63	40038	1
3	2005	2	27.3639	73.7108	0.470669	0.0360927	1.86922	148.272	3.82553	1011.72	40038	3
3	2005	3	27.6907	76.2909	130.727	7.35408	1.59659	157.713	4.8476	1011.35	40038	3
3	2005	4	29.1869	74.252	11.7803	5.1344	1.42583	167.693	4.87341	1010.26	40038	1
3	2005	5	28.2252	80.8926	164.032	16.5638	0.935774	129.018	7	1008.38	40038	16
3	2005	6	27.9084	81.7168	203.173	16.0161	0.909022	115.344	6.9238	1007.93	40038	17
3	2005	7	27.6672	81.1367	125.07	15.4655	0.966255	120.645	7.74511	1009.1	40038	29
3	2005	8	27.8092	80.213	161.942	17.0211	1.1647	129.304	7.7238	1008.96	40038	41
3	2005	9	27.5328	81.9766	142.119	15.0983	0.716642	106.744	7.41992	1009.26	40038	27
3	2005	10	26.442	87.2364	318.15	24.0131	0.719758	93.2433	8.48476	1010.06	40038	13
3	2005	11	26.3076	87.1602	491.523	17.0803	0.995347	79.8088	8	1010.11	40038	11
3	2005	12	25.0969	89.3437	593.158	22.4263	1.12878	66.086	8.34372	1010.28	40038	2
3	2006	1	26.3228	82.765	125.625	12.4263	0.824751	94.1775	6	1010.82	40297	2
3	2006	2	26.8762	81.617	221.845	12.9689	1.25752	115.96	5.58835	1011.16	40297	0
3	2006	3	27.7997	78.617	38.8315	7.42627	1.08101	132.81	5	1009.51	40297	1
3	2006	4	27.8675	81.8519	133.323	15.9869	0.619312	125.113	5.7364	1008.88	40297	0
3	2006	5	27.2678	85.0869	193.372	18.6179	0.694174	103.647	7	1009.15	40297	4
3	2006	6	27.4826	84.0869	281.46	18.3491	0.882233	118.941	7.32475	1008.62	40297	2
3	2006	7	27.5269	81.8816	132.119	20.0342	1.01117	103.037	7.7364	1008.84	40297	1
3	2006	8	27.4234	81.2063	216.885	18.0672	0.750145	123.659	7.32475	1008.82	40297	0
3	2006	9	27.1029	83.8233	257.493	20.0361	0.767814	112.096	7.32475	1009.88	40297	2
3	2006	10	26.7292	85.4986	217.282	19.4785	0.620534	113.855	7	1011.09	40297	3
3	2006	11	26.8643	85.5883	246.462	20.4393	0.63888	84.2409	6.2636	1010.25	40297	3
3	2006	12	26.4553	83.0286	203.864	16.7903	1.57776	85.9915	6.58835	1011.1	40297	6
3	2007	1	26.0878	82.8806	107.793	12.8936	1.26009	84.3736	6.58835	1012.4	40055	2
3	2007	2	26.6463	76.8548	15.1625	3.00499	1.21892	120.856	4.67525	1011.58	40055	1
3	2007	3	27.6614	77.0898	125.652	9.02612	1.06621	146.9	5.41165	1009.98	40055	0
3	2007	4	28.2177	80.8519	139.723	12.977	1.03985	129.642	5.41165	1009.7	40055	0
3	2007	5	27.6177	84.6752	281.262	21.8525	0.73888	103.933	7	1008.8	40055	4
3	2007	6	27.9739	83.4374	170.558	16.5818	0.853009	108.645	7	1007.48	40055	2
3	2007	7	27.3681	83.084	182.201	22.4655	1.04976	100.348	7.7364	1008.74	40055	7
3	2007	8	27.5269	80.4957	158.436	16.5638	1.42626	119.183	7.41165	1008.55	40055	1
3	2007	9	27.3707	82.7335	224.866	19.5557	1.00315	106.883	6.7364	1008.73	40055	0
3	2007	10	26.2205	87.9102	340.871	26.6359	0.882909	80.5829	7.7364	1009.46	40055	0
3	2007	11	25.9318	86.0869	388.076	17.4493	0.83019	80.7845	7	1010.1	40055	2
3	2007	12	26.2141	82.8519	178.596	13.3591	1.17747	90.6076	6	1010.18	40055	2
3	2008	1	26.2701	83.765	212.81	10.4673	0.718636	90.2018	5.58835	1010.79	40162	3
3	2008	2	26.4264	79.4403	63.7988	6.50344	1.20126	105.605	6	1011.28	40162	4
3	2008	3	27.2	80.4403	82.8927	10.977	1.05723	124.458	5	1009.71	40162	2
3	2008	4	27.5881	81.4117	139.472	12.1114	0.595527	113.46	5.7364	1008.42	40162	2
3	2008	5	27.4032	83.9102	225.498	21.4343	0.702864	110.371	7	1008.51	40162	7
3	2008	6	27.4356	82.9971	140.611	18.1114	0.899613	99.9988	7	1008.73	40162	15
3	2008	7	27.5241	82.2607	121.423	16.1655	0.946217	110.65	7	1008.53	40162	6
3	2008	8	27.5942	81.4374	144.158	17.3572	0.740778	122.862	6.2636	1008.5	40162	9
3	2008	9	27.1356	83.2607	168.505	16.1605	0.987382	96.6558	7	1009.21	40162	6
3	2008	10	27.0765	86.0257	182.92	21.4704	0.626649	100.605	7	1009.57	40162	10
3	2008	11	25.9235	89.3791	724.31	20.4313	0.871355	71.9906	8	1009.36	40162	8
3	2008	12	25.5675	85.9675	157.289	13.8295	1.10669	75.4556	7	1010.7	40162	1
3	2009	1	25.3	81.9675	107.899	6.92473	1.3681	92.9578	5.58835	1012.18	40209	5
3	2009	2	27.0206	78.2311	12.8016	2.04915	0.997715	109.873	5	1009.94	40209	5
3	2009	3	27.4412	81.6427	138.959	15.0081	0.989025	121.324	6	1009.75	40209	3
3	2009	4	27.7353	83.466	197.141	14.0983	0.653685	109.063	6.2636	1008.82	40209	4
3	2009	5	27.6794	84.6141	197.826	20.8606	0.676504	98.7794	7	1007.73	40209	14
3	2009	6	28.571	78.6112	57.3025	10.1213	1.24622	125.248	5.7364	1008.44	40209	9
3	2009	7	27.8093	81.7879	138.249	15.5476	1.08127	112.734	7	1008.69	40209	6
3	2009	8	27.7234	81.6724	237.918	19.9359	1.03399	117.585	7	1008.44	40209	9
3	2009	9	27.4472	82.6724	186.733	17.972	1.06714	109.283	7	1009.08	40209	5
3	2009	10	26.9942	85.0257	141.758	18.972	0.829224	101.666	7	1009.64	40209	9
3	2009	11	26.7617	85.1413	315.147	13.4032	1.34393	89.4985	6.58835	1009.72	40209	6
3	2009	12	26.2939	83.8806	121.817	10.8886	0.944319	92.745	5.58835	1011.29	40209	3
3	2010	1	26.6412	82.4078	90.6611	9.45429	1.07679	104.666	5.58835	1011.83	40291	13
3	2010	2	27.4206	77.5845	30.8051	3.43933	1.18616	126.206	4.2636	1011.2	40291	6
3	2010	3	28.1206	77.4078	68.5242	6.07219	1.1215	144.329	5	1010.74	40291	12
3	2010	4	28.9325	78.6427	54.8406	7.90478	0.91252	146.668	5	1009.64	40291	12
3	2010	5	29.3328	79.701	120.341	12.5968	0.824074	134.59	6	1007.47	40291	17
3	2010	6	28.0385	82.2607	182.159	17.0031	0.746893	110.071	7	1008.53	40291	20
3	2010	7	27.4208	83.2607	176.313	17.6179	0.719857	101.111	7	1008.46	40291	63
3	2010	8	27.6295	82.5855	142.182	16.5737	0.899613	109.527	7	1008.52	40291	59
3	2010	9	27.2826	85.0257	190.085	24.4785	0.60383	105.634	7	1008.77	40291	56
3	2010	10	26.8794	85.7622	281.999	21.0983	0.776794	92.1518	7.32475	1008.36	40291	31
3	2010	11	25.835	90.3791	690.341	26.4443	0.603154	65.2158	8	1009.06	40291	11
3	2010	12	25.9202	88.0544	352.96	18.4443	0.515095	73.8403	7	1008.69	40291	0
3	2011	1	25.5026	86.9675	378.221	21.4443	0.850434	76.8073	7.32475	1010.18	40223	1
3	2011	2	26.9058	80.083	45.0695	5.04417	1.10126	100.704	5.58835	1010.12	40223	7
3	2011	3	26.4	86.318	1013.91	18.4754	1.37805	79.1999	6.58835	1009.23	40223	1
3	2011	4	27.7379	81.9388	97.8065	9.58679	0.9215	110.514	5.7364	1009.47	40223	0
3	2011	5	28.053	83.0257	169.765	17.5426	0.955873	121.641	6.58835	1008.66	40223	2
3	2011	6	27.962	82.936	116.473	16.5327	1.14908	99.9638	7	1008.03	40223	3
3	2011	7	27.3945	83.5243	142.925	15.0803	1.24583	99.4194	7.2636	1008.27	40223	2
3	2011	8	27.2855	83.1126	214.475	19.018	1.06131	113.883	7.58835	1008.88	40223	5
3	2011	9	27.062	84.5243	174.957	16.4885	1.16064	98.5437	7.58835	1009.32	40223	2
3	2011	10	26.7177	87.2024	238.872	20.5115	0.902477	87.9714	7.2636	1009.39	40223	5
3	2011	11	26.5939	87.2024	333.648	19.323	1.23524	88.3598	7.2636	1009.42	40223	1
3	2011	12	25.8701	87.0544	282.227	18.3641	1.58796	74.2711	7.1767	1010.32	40223	0
3	2012	1	26.1437	85.7039	596.767	15.8886	1.37966	78.3429	6.85195	1010.34	40406	5
3	2012	2	27.2235	80.5558	19.0344	6.50154	1.30087	111.112	5.2636	1009.38	40406	2
3	2012	3	27.6588	80.7908	108.863	13.3721	1.10669	125.152	6.2636	1009.41	40406	2
3	2012	4	27.9003	82.5529	117.072	14.1114	1.07164	109.329	6.58835	1009.28	40406	3
3	2012	5	28.0771	81.6981	159.46	15.1836	1.28185	112.213	6.58835	1007.84	40406	6
3	2012	6	28.1182	78.9617	112.649	9.59178	1.61364	115.023	6.58835	1008.19	40406	7
3	2012	7	27.9446	80.1098	148.229	11.6851	1.51107	111.011	7	1008.18	40406	7
3	2012	8	28.0472	79.936	184.089	11.5507	1.4934	125.608	6.58835	1009.09	40406	7
3	2012	9	27.0411	84.8491	183.821	22.5327	1.16961	90.4723	7.58835	1009.64	40406	7
3	2012	10	26.7852	86.7908	225.023	18.8787	0.923687	91.2464	6.58835	1010.12	40406	12
3	2012	11	26.9087	88.3791	241.009	18.8886	0.785773	74.0118	6.85195	1009.78	40406	16
3	2012	12	26.6588	87.1155	291.434	14.9378	1.10888	76.5131	6.85195	1009.89	40406	15
3	2013	1	26.6762	84.2922	59.8285	9.40822	1.24461	91.149	6.58835	1011.65	40560	29
3	2013	2	26.7499	82.8806	113.029	9.42627	1.36228	94.1807	6.85195	1010.68	40560	20
3	2013	3	28.1882	80.1442	13.1656	3.01805	1.04461	139.371	4.85195	1010.56	40560	18
3	2013	4	28.3588	82.1155	202.316	11.5376	0.803154	115.936	6.2636	1008.69	40560	15
3	2013	5	28.1292	84.2636	255.525	17.4835	0.755873	112.745	6.85195	1008.46	40560	24
3	2013	6	27.962	83.1738	153.481	16.1655	1.5037	96.1234	7.2636	1007.31	40560	39
3	2013	7	27.097	84.5855	171.077	17.5246	1.3185	89.2939	7.58835	1008.18	40560	23
3	2013	8	27.3234	82.9102	161.023	16.4605	1.55642	116.303	6.58835	1008.69	40560	15
3	2013	9	27.3707	83.2607	128.109	15.5507	1.67122	102.351	7.2636	1008.98	40560	10
3	2013	10	26.6029	86.9388	180.954	22.9869	1.07258	90.4075	7.2636	1010.36	40560	6
3	2013	11	26.6202	87.4403	646.338	18.8836	1.29923	80.5732	6.85195	1009.3	40560	5
3	2013	12	25.9466	85.1767	219.371	11.346	1.95278	87.2319	6.85195	1010.6	40560	0
3	2014	1	25.5675	81.4689	138.237	8.4182	1.65262	97.7695	6.44029	1012.72	40783	0
3	2014	2	26.1907	76.0859	0.766091	0.98694	1.64174	124.846	4.11554	1010.96	40783	6
3	2014	3	27.4734	75.9092	10.0437	1.55568	1.83602	158.482	3.85195	1011.09	40783	7
3	2014	4	28.4565	79.6398	101.953	7.63903	1.42407	138.531	5.93885	1009.6	40783	0
3	2014	5	28.2417	83.1126	191.268	16.0031	1.10573	121.711	6.2636	1008.83	40783	2
3	2014	6	28.206	82.3476	131.941	14.0622	1.9101	101.182	6.85195	1007.46	40783	7
3	2014	7	27.9825	81.4957	155.71	20.0883	1.92356	110.679	7.2636	1008.57	40783	10
3	2014	8	27.4147	83.5243	251.819	20.0031	1.43971	107.307	7.2636	1009.46	40783	13
3	2014	9	27.1617	85.0257	158.357	19.8426	1.3018	98.1787	7.2636	1009.83	40783	12
3	2014	10	26.7029	87.9388	272.982	22.4082	1.21117	90.0585	7.2636	1010.25	40783	10
3	2014	11	26.6852	89.1155	313.989	20.4624	1.0234	71.4863	7.2636	1010.17	40783	13
3	2014	12	26.3852	87.7908	403.205	21.3952	1.74937	74.0428	6.85195	1010.75	40783	4
3	2015	1	26.0939	83.1442	41.7346	7.91167	1.63753	96.2589	5.44029	1012.51	40875	5
3	2015	2	25.9647	79.2597	9.90136	1.98195	1.73495	109.008	4.11554	1012.3	40875	2
3	2015	3	27.8531	77.3209	2.61666	1.01805	1.68835	146.575	4.11554	1011.75	40875	1
3	2015	4	28.5	79.9675	84.2303	8.51959	1.31184	129.975	5.52719	1010	40875	2
3	2015	5	28.5266	81.701	98.0913	16.6621	1.18481	134.723	6.2636	1009.48	40875	1
3	2015	6	28.0266	83.4374	115.739	12.9409	1.2253	98.8559	6.85195	1009	40875	4
3	2015	7	27.8472	82.7593	182.549	18.5407	1.812	117.688	7	1009.25	40875	9
3	2015	8	27.253	85.4374	261.778	19.9981	1.27802	106.4	7.2636	1009.73	40875	4
3	2015	9	27.2205	86.0257	214.936	19.9048	1.14554	103.524	7.2636	1010.21	40875	7
3	2015	10	27.1675	87.5272	274.595	20.1394	0.913742	94.3091	7.2636	1011.3	40875	9
3	2015	11	26.5527	90.4403	433.426	25	0.922721	69.3015	7.2636	1010.45	40875	24
3	2015	12	26.7202	87.0286	241.151	16.8886	1.36131	90.1032	5.85195	1012.09	40875	7
3	2016	1	27.2762	83.8806	73.1368	9.35907	1.48223	101.873	5.2636	1012.22	40900	5
3	2016	2	26.9174	80.9092	69.8201	7.39516	2.29704	105.189	5.44029	1012.7	40900	3
3	2016	3	28.3528	77.234	0	0	1.61538	149.3	3.85195	1011.66	40900	1
3	2016	4	30.1441	74.6456	5.60792	2.98195	1.54976	160.821	3.85195	1009.4	40900	0
3	2016	5	29.1328	80.9388	128.743	14.4785	1.45806	134.092	6.2636	1008.63	40900	2
3	2016	6	28.118	82.0869	150.21	14.5426	1.27544	111.86	6.85195	1009.32	40900	3
3	2016	7	27.5617	85.3505	373.026	18.3983	1.19636	98.0384	7.2636	1008.91	40900	1
3	2016	8	27.7973	83.6724	152.682	21.0161	1.83836	110.339	7	1008.21	40900	11
3	2016	9	27.45	83.7335	188.502	21.3702	1.812	113.989	7.2636	1009.19	40900	18
3	2016	10	27.0118	87.3505	301.006	24.3752	1.55384	88.5789	7.67525	1008.93	40900	16
3	2016	11	27.0852	88.617	237.213	18.8264	1.20792	82.9203	6.85195	1009.83	40900	12
3	2016	12	26.0878	89.0286	727.709	18.9117	1.64258	63.3112	6.85195	1010.15	40900	1
3	2017	1	25.8026	89.8806	1091.88	23.3771	1.50821	58.6149	7.58835	1010.46	40952	4
3	2017	2	26.6585	82.7325	68.6468	10.4574	1.70248	92.4281	5.85195	1011.82	40952	4
3	2017	3	27.6235	80.8806	101.914	8.55568	1.47287	121.759	5.2636	1010.41	40952	2
3	2017	4	27.5819	85.5272	191.569	15.0703	1.38156	108.217	6	1009.83	40952	16
3	2017	5	28.2559	84.4374	134.263	18.667	1.5336	102.858	6.52719	1008.5	40952	16
3	2017	6	28.2411	82.3219	169.428	15.0753	1.48535	119.558	6.2636	1008.95	40952	26
3	2017	7	27.8559	83.5855	125.982	17.5868	1.50914	105.748	6.85195	1009.07	40952	12
3	2017	8	27.7707	84.1738	200.731	20.4474	1.58278	111.949	6.58835	1008.66	40952	19
3	2017	9	27.5205	85.4117	208.269	19.9489	1.34554	103.213	7.2636	1009.34	40952	3
3	2017	10	27.6177	85.2636	143.2	15.4524	1.29826	108.611	6.52719	1009.31	40952	7
3	2017	11	26.5588	89.1155	694.385	23.018	1.55156	73.321	7.2636	1008.61	40952	3
3	2017	12	26.0202	86.617	369.132	15.4624	1.95671	73.0366	6.44029	1010.69	40952	4
3	2018	1	26.1264	87.8519	217.409	17.4704	1.17612	76.8069	6.85195	1009.71	40910	2
3	2018	2	26.6971	79.8806	19.5836	3.98195	1.66199	108.062	4.52719	1011.59	40910	5
3	2018	3	27.8708	79.1442	75.9735	5.55568	1.5533	132.844	4.11554	1010.07	40910	7
3	2018	4	28.0823	80.8806	109.223	10.0311	1.4234	123.181	5.2636	1009.21	40910	8
3	2018	5	27.7617	85.2024	213.264	16.1375	1.02597	105.596	6.2636	1009.05	40910	8
3	2018	6	27.697	83.8491	150.219	18.0392	1.44297	100.883	7.2636	1008.91	40910	9
3	2018	7	27.9089	81.7593	164.618	18.5096	2.05535	112.747	6.67525	1008.14	40910	12
3	2018	8	27.8851	82.6724	141.137	16.0572	2.05535	104.083	7	1008.47	40910	23
3	2018	9	27.1942	84.7622	194.128	21.3752	1.35452	102.524	6.2636	1009.59	40910	20
3	2018	10	27.0852	86.8519	281.672	22.5196	1.19636	91.9432	6.67525	1010.71	40910	9
3	2018	11	26.6148	88.2922	125.734	7.95085	1.16418	29.9589	6.58835	1009.81	40910	6
3	2018	12	26.7791	88.0286	477.927	20.9689	1.21471	83.511	6.58835	1010.82	40910	1
4	2002	1	25.6163	82.0974	2.36752	4.95128	0.62761	106.246	6.01137	1013.34	65628	3
4	2002	2	26.8996	80.1137	2.9726	0.983759	0.916241	129.193	6.00974	1013.79	65628	7
4	2002	3	27.4042	77.1462	44.6132	6.95128	0.614617	157.179	5.03411	1010.98	65628	5
4	2002	4	27.1243	81.0974	112.074	13	0.617865	135.849	5.02923	1010.22	65628	10
4	2002	5	27.0231	84.0487	158.461	12.9838	0.416241	116.882	7.02111	1009.64	65628	85
4	2002	6	27.3951	85	115.292	17.9513	0.419489	98.3179	7.0065	1008.18	65628	186
4	2002	7	27.0984	86.9513	168.59	21.935	0.334106	121.837	6.99838	1009.25	65628	165
4	2002	8	26.887	85.0487	235.83	23.9513	0.521113	103.341	7.02761	1009.14	65628	78
4	2002	9	26.9854	86.0325	348.549	23.0325	0.222737	96.5724	7.00974	1009.9	65628	13
4	2002	10	27.087	87.0162	263.439	21.0325	0.317865	120.976	7.00812	1010.33	65628	3
4	2002	11	26.2	86.0487	238.735	19	0.221113	109.615	8.00325	1009.97	65628	5
4	2002	12	25.9081	84.0487	144.674	13.0325	0.316241	105.396	7.39675	1013.05	65628	3
4	2003	1	26.8886	82.9675	19.5155	9.93504	0.716241	95.9079	6.19026	1010.1	65320	3
4	2003	2	27.4935	77.9675	4.80812	1.03248	1.11949	95.2399	3.33086	1011.17	65320	2
4	2003	3	28.1951	76	29.5689	6.98376	1.11949	98.0803	4.33086	1010.33	65320	0
4	2003	4	28.7935	75.0325	32.6696	8.98376	1.1065	167.871	3.9406	1009.23	65320	2
4	2003	5	27.3016	85.9838	254.457	17.9838	0.521113	137.912	8.10487	1008.74	65320	10
4	2003	6	27.3951	84	129.291	14.9675	0.622737	109.489	5.92111	1009.08	65320	11
4	2003	7	26.6968	86.0162	173.299	20.0162	0.819489	110.743	7.71299	1009.75	65320	7
4	2003	8	27.0968	85	187.122	15.9838	0.719489	110.716	6.91299	1009.55	65320	4
4	2003	9	26.7968	86.9838	265.53	24.9026	0.521113	115.19	8.3	1010.16	65320	3
4	2003	10	26.0968	89	190.246	26.9675	0.516241	78.6617	8.60325	1010.34	65320	0
4	2003	11	26.4984	85.0325	131.152	13.9675	0.617865	91.5958	6.41299	1010.49	65320	0
4	2003	12	25.5	84	279.917	8.0812	0.730858	85.2543	6.51462	1011.77	65320	0
4	2004	1	26.2016	80	9.62018	5.98376	0.425986	103.666	4.31949	1011.36	63456	0
4	2004	2	26.9032	77	12.2773	6.01624	0.712993	119.689	5.41299	1011.18	63456	0
4	2004	3	28.1049	76.9675	96.7682	7.9188	0.83573	147.832	5.70812	1009.97	63456	0
4	2004	4	28.3049	78.9838	65.6218	8	0.716241	138.079	6.2065	1009.43	63456	0
4	2004	5	27.4032	84.9838	109.947	18.9026	0.819489	116.082	7.30812	1008.99	63456	3
4	2004	6	26.7984	85.0162	100.204	17.0487	0.829234	103.094	7.6	1009.9	63456	4
4	2004	7	26.4	86.0162	328.728	20	0.324361	99.2211	8.1	1009.31	63456	5
4	2004	8	26.6968	87	178.046	23.9838	0.530858	103.72	8.10162	1009.53	63456	1
4	2004	9	26.7935	85.0325	112.793	15.0812	0.421113	109.138	8.00325	1010.28	63456	4
4	2004	10	26.5968	85.0162	103.541	20.065	0.517865	95.9745	7.99838	1011.21	63456	4
4	2004	11	26.8903	84.0487	84.2719	16	0.621113	87.9787	7.10487	1010.9	63456	6
4	2004	12	26.0951	81.0325	33.3232	5.04872	0.72761	99.4568	6.10325	1011.19	63456	7
4	2005	1	26.3968	76.0162	12.1715	4	0.821113	124.243	5.21787	1011.56	63352	0
4	2005	2	27.7049	70.9675	0.0617158	0.016241	0.921113	148.258	3.62436	1011.68	63352	0
4	2005	3	28	73.9675	54.4752	6	0.734106	155.934	5	1011.27	63352	0
4	2005	4	29.4919	72.0487	10.1241	7.01624	0.819489	165.451	4.91787	1010.28	63352	0
4	2005	5	27.9984	82.0162	200.782	19.935	0.621113	119.058	7	1008.73	63352	3
4	2005	6	27.4919	85.0325	276.491	20.0162	0.622737	106.347	7	1008.39	63352	4
4	2005	7	27.3919	84.0162	121.402	17.0162	0.624361	110.07	7.60974	1009.55	63352	5
4	2005	8	27.4935	83.0325	259.943	20	0.629234	117.314	7.80325	1009.4	63352	1
4	2005	9	27.2951	84.0162	135.89	16.9675	0.424361	93.9056	7.01624	1009.71	63352	4
4	2005	10	26.3984	88.0162	274.006	24.9838	0.33573	92.5993	8.50812	1010.36	63352	4
4	2005	11	26.2984	88	298.767	18.9188	0.43573	77.5617	8	1010.32	63352	6
4	2005	12	25.2	89	349.894	20.9675	0.479581	72.974	8	1010.36	63352	7
4	2006	1	26.3968	81.0162	80.7545	11.0162	0.525986	104.985	6	1010.92	63422	6
4	2006	2	26.9984	79	137.73	11.9675	0.619489	143.351	5.01624	1011.15	63422	3
4	2006	3	28.0951	76.0325	32.6851	6.11369	0.621113	141.36	5.01624	1009.62	63422	1
4	2006	4	27.8935	81.0325	163.419	15.065	0.416241	126.453	6	1009.12	63422	2
4	2006	5	26.9984	86	215.226	22.0325	0.42761	109.956	7	1009.54	63422	6
4	2006	6	27.2935	85.0325	316.799	18.065	0.329234	126.792	7	1009.14	63422	0
4	2006	7	26.9049	86	211.465	24.0162	0.534106	83.2673	8	1009.54	63422	6
4	2006	8	26.9032	84.9838	248.417	19.0487	0.617865	121.804	7.01624	1009.5	63422	2
4	2006	9	26.9032	84.9838	296.747	20.0325	0.514617	122.966	7.01624	1010.37	63422	4
4	2006	10	26.5065	86.9675	148.653	21.9675	0.319489	89.1232	7.01624	1011.43	63422	5
4	2006	11	26.7081	84.9838	82.922	19.935	0.311369	89.4179	6.01624	1010.33	63422	3
4	2006	12	26.5016	81.0325	31.412	11.9838	0.929234	96.7708	6	1011.01	63422	10
4	2007	1	26.1032	80.0162	26.2223	8.98376	0.712993	95.0153	6	1012.25	63214	10
4	2007	2	26.8984	73.0162	24.8039	2	0.60812	131.241	4.98376	1011.35	63214	8
4	2007	3	27.7016	75.0162	129.135	10.9188	0.509745	160.128	5.98376	1010.01	63214	10
4	2007	4	28.1	79.9838	110.365	14.0162	0.509745	128.778	6	1009.7	63214	19
4	2007	5	27.4968	84.9838	284.675	18.9675	0.40812	107.173	7.01624	1009.19	63214	29
4	2007	6	27.7	84.9838	160.087	20.0325	0.50812	106.285	7	1007.91	63214	19
4	2007	7	26.8	86.9838	249.544	23.9675	0.50812	93.151	8	1009.21	63214	14
4	2007	8	26.9049	84.9675	230.339	19.9513	0.712993	109.741	8	1009.13	63214	9
4	2007	9	26.9032	85.9838	309.201	21.0325	0.512993	98.974	7.01624	1009.32	63214	2
4	2007	10	25.9032	89.9838	279.778	29.9675	0.409745	83.6418	8	1009.84	63214	1
4	2007	11	25.8032	86.9838	167.769	15.0162	0.419489	87.1497	7	1010.17	63214	0
4	2007	12	26.2032	82	86.8812	10.9838	0.811369	94.4984	6	1010.1	63214	0
4	2008	1	26.4065	81.9838	40.4684	7.98376	0.414617	95.1647	5.01624	1010.7	63742	0
4	2008	2	26.4032	77.9838	44.5241	4.04872	0.714617	113.223	6	1011.16	63742	3
4	2008	3	27.2	79	61.6575	11.935	0.70812	130.06	5.01624	1009.64	63742	2
4	2008	4	27.3049	81.9838	114.158	14.9513	0.504872	108.509	6	1008.56	63742	2
4	2008	5	26.9049	85.9838	265.376	22	0.509745	116.039	7.01624	1009.07	63742	5
4	2008	6	26.9049	85.9838	187.403	20.8863	0.50812	94.736	7.01624	1009.3	63742	12
4	2008	7	27.1	84.9838	141.352	19	0.50812	101.655	7	1009.18	63742	6
4	2008	8	27.3032	82.9838	143.356	18.9838	0.411369	118.329	6.01624	1009.06	63742	4
4	2008	9	26.6049	85.9675	206.149	19.9026	0.612993	91.0002	7	1009.98	63742	5
4	2008	10	26.9	86.9838	107.557	21.9513	0.304872	100.016	7.01624	1010.05	63742	4
4	2008	11	26.1032	88	277.595	18	0.511369	74.4441	8	1009.61	63742	11
4	2008	12	25.6065	84.0162	46.8552	11.9188	0.525986	77.3088	7	1010.81	63742	5
4	2009	1	25.3065	80.0162	31.2659	4.04872	0.809745	97.2341	5.03248	1012.13	63757	5
4	2009	2	27.4032	75.9838	13.871	2.98376	0.6	116.643	5	1010.02	63757	0
4	2009	3	27.4968	80.0162	173.513	16.9675	0.501624	129.003	6.01624	1010.01	63757	3
4	2009	4	27.5	83	94.4385	15.9838	0.404872	115.781	6.01624	1009.3	63757	7
4	2009	5	27.3016	84.9838	193.73	20	0.501624	93.864	7.01624	1008.33	63757	12
4	2009	6	27.8016	82	86.6833	11.0162	0.806496	111.107	6.01624	1009.13	63757	21
4	2009	7	27.3	83.9838	162.519	14.9838	0.706496	104.757	7	1009.39	63757	5
4	2009	8	27.2	84.9838	335.522	21.9838	0.609745	113.133	7.01624	1009.12	63757	5
4	2009	9	26.8049	85.9838	217.559	20	0.704872	101.457	7.01624	1009.87	63757	7
4	2009	10	26.7	86	196.381	20.9838	0.603248	105.477	7.01624	1009.95	63757	4
4	2009	11	26.5032	84.9838	163.627	13.0325	0.516241	95.11	6.01624	1009.75	63757	2
4	2009	12	26.3065	81.0162	18.229	8.09745	0.506496	99.8701	5.01624	1011.24	63757	7
4	2010	1	26.7065	79	11.1332	5.98376	0.616241	106.486	5.01624	1011.71	63990	2
4	2010	2	27.8032	73.0162	53.9742	3.09745	0.90812	136.443	4.01624	1011.06	63990	3
4	2010	3	28.5032	74	57.5761	6.01624	0.609745	161.965	5	1010.68	63990	5
4	2010	4	28.9	76.9838	87.3601	9.03248	0.603248	159.903	5.01624	1009.69	63990	15
4	2010	5	28.9968	81	115.736	13.0812	0.406496	127.025	6.01624	1007.78	63990	51
4	2010	6	27.3016	85	190.407	20.0162	0.412993	105.061	7	1009.14	63990	102
4	2010	7	26.8016	85.9838	217.903	21.0487	0.309745	100.042	7.01624	1009	63990	112
4	2010	8	27.0984	85	156.925	18.1137	0.512993	100.82	7.01624	1009.03	63990	16
4	2010	9	27.0984	85.9838	267.115	26.9838	0.211369	111.622	7.01624	1009.13	63990	2
4	2010	10	26.5016	86.9838	290.371	23.0162	0.312993	89.8678	7.01624	1008.8	63990	1
4	2010	11	25.9032	89	342.602	25	0.122737	58.3919	8	1009.24	63990	4
4	2010	12	25.9081	86.9838	217.669	17.065	0.306496	72.4903	7.01624	1008.8	63990	2
4	2011	1	25.6081	84.9838	199.182	19.9026	0.406496	82.1831	7	1010.15	64267	2
4	2011	2	27.2016	77.0325	55.7336	7.0812	0.603248	106.368	5.01624	1010.04	64267	2
4	2011	3	26.3984	85.0162	509.596	18.0162	0.412993	77.2559	6.01624	1009.2	64267	4
4	2011	4	27.6114	81.9675	107.742	11.8863	0.40812	98.7986	6	1009.51	64267	1
4	2011	5	27.7	84	158.072	18.0812	0.409745	117.306	6.01624	1009.15	64267	1
4	2011	6	27.4	85.9838	105.921	19.0325	0.511369	79.8014	7	1008.6	64267	0
4	2011	7	26.8032	85.9838	194.964	17	0.412993	87.0909	7.01624	1008.84	64267	2
4	2011	8	26.9016	85	235.655	19.0487	0.409745	108.563	7.01624	1009.44	64267	8
4	2011	9	26.5065	86.9838	244.703	17.1299	0.412993	88.6633	7.01624	1009.96	64267	2
4	2011	10	26.6049	86.9675	111.914	19.9675	0.311369	79.3754	7.01624	1009.7	64267	1
4	2011	11	26.5984	87	194.115	17.0812	0.316241	86.1343	7	1009.54	64267	0
4	2011	12	25.9984	86.0162	172.634	15.0487	0.62761	72.2193	6.01624	1010.32	64267	0
4	2012	1	26.2968	84.0325	167.255	13.0974	0.70812	75.3079	6.01624	1010.34	64608	0
4	2012	2	27.3984	78	27.4213	7.96752	0.414617	115.51	5	1009.26	64608	3
4	2012	3	27.5951	80.0162	81.806	12.065	0.509745	124.566	6.01624	1009.54	64608	4
4	2012	4	27.5935	83.0162	180.94	17.1462	0.409745	99.2956	6.01624	1009.6	64608	1
4	2012	5	27.2935	86	271.985	18.065	0.322737	86.0039	6.01624	1008.52	64608	5
4	2012	6	27.3951	83.0162	166.017	11	0.522737	88.9005	6.01624	1008.83	64608	3
4	2012	7	27.1984	85	231.917	15.9675	0.321113	88.4527	7	1008.78	64608	6
4	2012	8	27.3968	82.9838	227.981	14	0.419489	98.1761	6.01624	1009.69	64608	15
4	2012	9	26.4	87	232.615	24.9513	0.212993	75.5455	7.01624	1010.29	64608	2
4	2012	10	26.6984	86.0162	208.041	18.0325	0.109745	89.9747	6.01624	1010.45	64608	1
4	2012	11	26.9951	87	115.055	16	0.112993	75.1348	6.01624	1009.96	64608	0
4	2012	12	26.6	86.0162	138.147	13.0162	0.204872	75.2422	6.01624	1009.99	64608	2
4	2013	1	26.8	82.0162	36.2116	7.98376	0.511369	97.1536	6	1011.58	64889	29
4	2013	2	26.9065	79.9838	69.4007	7.98376	0.514617	95.5072	6	1010.65	64889	19
4	2013	3	28.5968	76.9838	20.9854	3.01624	0.314617	150.189	4.01624	1010.58	64889	17
4	2013	4	28.2984	80.9838	124.371	13	0.311369	110.637	6.01624	1009.04	64889	40
4	2013	5	27.8968	84	240.073	18.9026	0.214617	105.364	6.01624	1008.92	64889	93
4	2013	6	27.4	84.9838	229.958	18.9838	0.811369	85.264	7	1007.84	64889	75
4	2013	7	26.6	87	212.253	18.0812	0.70812	73.6114	7.01624	1008.74	64889	43
4	2013	8	26.8	85	196.961	19.0162	0.80812	101.053	6.01624	1009.24	64889	39
4	2013	9	26.8984	85.9838	169.734	18	1.0065	92.2441	7	1009.51	64889	23
4	2013	10	26.3968	87.0162	141.623	22.0812	0.6	88.1497	7.01624	1010.66	64889	10
4	2013	11	26.6	86	274.739	17	0.504872	81.9691	6.01624	1009.34	64889	10
4	2013	12	25.9049	84	107.789	7.9188	0.629234	90.6585	6	1010.48	64889	2
4	2014	1	25.6065	78.0487	21.0077	4.95128	0.912993	104.336	5.01624	1012.5	64918	3
4	2014	2	26.6984	70.0325	0.272849	0	1.10325	147.434	3.01624	1010.67	64918	3
4	2014	3	27.8	71.0162	19.6831	3.01624	1.69675	171.649	3.01624	1010.82	64918	4
4	2014	4	28	80.9838	199.428	14.0325	1	129.524	6	1009.78	64918	2
4	2014	5	27.6984	84.9838	182.865	18.9675	0.703248	107.304	6.01624	1009.19	64918	3
4	2014	6	27.4968	86	168.064	16.065	0.903248	85.178	6.01624	1007.99	64918	9
4	2014	7	27.0984	86	233.394	23.9188	0.80812	90.6283	7	1009.15	64918	35
4	2014	8	26.7968	86	341.517	22.9513	0.606496	85.1471	7	1009.91	64918	27
4	2014	9	26.8968	86.0162	194.99	19.0162	0.601624	86.923	7.01624	1010.24	64918	12
4	2014	10	26.4968	88	214.183	21.0162	0.7	89.6399	7.01624	1010.43	64918	10
4	2014	11	26.6	87.9838	217.594	19.0325	0.5	78.2659	7	1010.17	64918	5
4	2014	12	26.3016	87	186.307	18.9838	0.809745	80.1448	6.01624	1010.62	64918	8
4	2015	1	26.1032	80.0487	14.6193	3.98376	1.09675	102.107	4.03248	1012.25	64911	4
4	2015	2	26.2065	75.0325	2.45754	2.01624	1.10487	119.026	3.01624	1011.97	64911	1
4	2015	3	28.1951	73.0325	4.7594	1.01624	1.11137	156.038	3.03248	1011.47	64911	2
4	2015	4	28.4903	78.0325	58.5591	10.065	0.904872	125.069	5.01624	1009.86	64911	0
4	2015	5	28.1919	83	132.177	22.0487	0.709745	131.055	6.01624	1009.75	64911	2
4	2015	6	27.6903	84.9838	166.089	14.0325	0.70812	85.5	6.01624	1009.39	64911	6
4	2015	7	27.1919	86.9838	266.355	22.935	0.801624	112.468	7	1009.69	64911	16
4	2015	8	26.8968	86.9838	310.486	23.9675	0.698376	108.836	7	1010.12	64911	16
4	2015	9	26.8951	87	284.275	20.9838	0.598376	104.417	7.01624	1010.59	64911	11
4	2015	10	27.1951	86.9675	226.539	20.9026	0.501624	101.757	7.01624	1011.46	64911	10
4	2015	11	26.4968	89	295.245	25	0.304872	81.7181	7.01624	1010.45	64911	14
4	2015	12	26.7	84.9838	93.8107	13.9838	0.706496	98.4223	5.03248	1011.96	64911	15
4	2016	1	27.3968	81.0162	34.5923	6.98376	0.9	106.851	5	1011.95	64791	19
4	2016	2	27.0951	76.0487	24.2457	5.01624	1.79513	120.483	4.01624	1012.35	64791	10
4	2016	3	28.9951	72	0	0	1.1	165.668	3.01624	1011.37	64791	4
4	2016	4	30.6903	70	11.8998	3.01624	1.00487	158.829	3.01624	1009.3	64791	2
4	2016	5	28.7919	81	211.253	17	0.60812	127.695	6.01624	1008.9	64791	2
4	2016	6	27.6935	83.0162	182.071	15.0812	0.60812	103.979	6.01624	1009.76	64791	7
4	2016	7	27.2935	86.0162	596.94	19	0.6	83.6536	7	1009.28	64791	5
4	2016	8	26.9951	87	261.224	24.9675	0.80812	100.981	7.01624	1008.81	64791	13
4	2016	9	26.5968	87.0162	260.841	24.0162	0.803248	103.108	7.01624	1009.8	64791	23
4	2016	10	26.5951	88	329.707	26	0.703248	87.4158	8	1009.33	64791	12
4	2016	11	26.9968	86.0162	107.53	14	0.503248	81.3613	6.01624	1009.79	64791	4
4	2016	12	26.0984	87.0162	367.448	15.0162	0.606496	72.4471	6.03248	1010.08	64791	7
4	2017	1	25.8951	87.0487	467.435	20.9026	0.503248	61.432	7.01624	1010.37	64676	6
4	2017	2	26.9	79.0162	23.1854	9.95128	1.10162	95.5244	5.01624	1011.58	64676	8
4	2017	3	27.7935	78.0325	126.764	10.0162	0.706496	128.527	5.01624	1010.25	64676	14
4	2017	4	27.2968	84.9838	209.525	18.9675	0.701624	111.248	6	1009.9	64676	6
4	2017	5	27.6886	86	182.475	23	0.698376	88.3418	6.01624	1008.85	64676	19
4	2017	6	27.5968	84.9838	207.915	18	0.796752	105.748	6.01624	1009.35	64676	12
4	2017	7	27.2968	85.9838	156.57	19.935	0.703248	101.181	6.01624	1009.54	64676	18
4	2017	8	27.2935	86	252.591	21.9838	0.803248	96.4204	6.03248	1009.1	64676	22
4	2017	9	27.1968	85.9838	283.199	22.9513	0.803248	104.853	7	1009.68	64676	26
4	2017	10	27.4935	84.9838	163.685	15.9838	0.703248	109.347	6.01624	1009.48	64676	13
4	2017	11	26.4951	88.0162	373.101	22.9838	0.312993	70.7805	7.01624	1008.63	64676	8
4	2017	12	25.9984	84.0325	146.442	13.9838	0.912993	72.0234	5.03248	1010.55	64676	5
4	2018	1	26.0951	87.0162	206.033	18.0162	0.609745	72.3944	6.01624	1009.64	64617	6
4	2018	2	26.8984	77.0162	26.1216	3.98376	1.09675	110.681	4.01624	1011.26	64617	18
4	2018	3	28.0968	76.0162	42.3981	7.04872	0.90812	128.829	3.03248	1009.93	64617	15
4	2018	4	28.1919	78.0325	152.62	10.9675	0.904872	128.474	5.01624	1009.09	64617	24
4	2018	5	27.4903	85	312.17	20.9675	0.601624	105.794	6.01624	1009.23	64617	51
4	2018	6	27.1935	86	188.089	20.935	0.798376	88.1643	7.01624	1009.35	64617	44
4	2018	7	26.9984	86	235.056	22	0.803248	98.6255	7	1008.75	64617	39
4	2018	8	27.0951	86	230.451	18.9838	0.8	90.6568	7.01624	1008.99	64617	7
4	2018	9	26.8951	86	202.49	22.8701	0.598376	97.8327	6.01624	1009.96	64617	8
4	2018	10	26.9951	86.0162	234.347	23.9188	0.596752	90.138	7.01624	1010.78	64617	9
4	2018	11	26.6968	86.0162	33.5647	7	0.303248	29.5455	6.03248	1009.62	64617	3
4	2018	12	26.6968	86.0162	257.201	19.8863	0.598376	78.322	6.01624	1010.69	64617	4
5	2002	1	25.591	81.937	3.17964	5.16744	0.644501	106.138	6.01894	1012.57	27606	8
5	2002	2	26.8643	79.9171	1.76222	0.999231	0.939988	128.963	5.98468	1013.04	27606	2
5	2002	3	27.3768	76.9836	45.1516	7.01603	0.638078	157.45	5.00044	1010.21	27606	3
5	2002	4	27.1049	80.8949	110.202	12.8615	0.631655	136.16	5.02399	1009.44	27606	16
5	2002	5	27.0071	83.8498	157.677	13.0114	0.425385	117.268	6.99034	1008.85	27606	74
5	2002	6	27.4003	84.7848	116.828	17.8791	0.41468	98.8667	7.00318	1007.39	27606	71
5	2002	7	27.1113	86.6548	166.147	21.7476	0.327603	122.606	6.9882	1008.46	27606	78
5	2002	8	26.8986	84.742	235.103	23.7674	0.523167	104.191	7.01817	1008.35	27606	32
5	2002	9	26.9921	85.784	345.394	22.7254	0.225539	97.3415	7.00746	1009.12	27606	14
5	2002	10	27.0813	86.8475	263.005	20.8554	0.323321	121.347	6.99676	1009.55	27606	4
5	2002	11	26.182	85.9553	251.735	19.071	0.223398	109.595	7.99385	1009.21	27606	0
5	2002	12	25.8994	83.9782	159.469	13.1827	0.336168	105.439	7.39859	1012.27	27606	0
5	2003	1	26.8686	82.9148	24.2889	10.0994	0.718731	96.0354	6.20166	1009.35	27482	0
5	2003	2	27.4703	77.9614	5.08321	1.14911	1.13127	95.358	3.35741	1010.4	27482	0
5	2003	3	28.1676	76.0272	31.7925	7.12308	1.12699	98.4313	4.33952	1009.56	27482	0
5	2003	4	28.7693	74.9852	31.772	8.88603	1.10558	168.074	3.93126	1008.46	27482	1
5	2003	5	27.3004	85.8054	254.191	17.8791	0.514603	138.134	8.08949	1007.95	27482	1
5	2003	6	27.3896	83.8498	129.353	14.9456	0.612385	110.052	5.92116	1008.28	27482	2
5	2003	7	26.6987	85.8268	171.653	19.8776	0.807949	111.075	7.70693	1008.95	27482	4
5	2003	8	27.1027	84.8062	185.83	15.8806	0.718731	111.341	6.91182	1008.75	27482	0
5	2003	9	26.7944	86.8261	265.72	24.8095	0.512462	115.648	8.28934	1009.36	27482	0
5	2003	10	26.0864	88.8888	193.745	26.8508	0.50818	78.9785	8.59553	1009.55	27482	0
5	2003	11	26.4732	84.9775	140.306	14.0535	0.610244	91.6373	6.42077	1009.71	27482	0
5	2003	12	25.4783	83.9568	290.751	8.31501	0.729437	85.1823	6.5314	1010.99	27482	0
5	2004	1	26.1863	79.9813	10.6018	6.14526	0.440373	103.958	4.35236	1010.59	27383	0
5	2004	2	26.8708	77.0264	15.8875	6.03821	0.73586	119.561	5.43439	1010.41	27383	0
5	2004	3	28.0677	77.005	95.3239	7.95103	0.831501	147.649	5.71489	1009.2	27383	0
5	2004	4	28.2847	78.9179	64.14	7.90821	0.727296	138.259	6.20808	1008.65	27383	0
5	2004	5	27.4025	84.7634	107.721	18.8141	0.822937	116.687	7.30509	1008.2	27383	0
5	2004	6	26.8072	84.742	99.0017	16.8799	0.81009	103.789	7.59844	1009.1	27383	1
5	2004	7	26.4033	85.8054	325.556	19.8562	0.316898	100.053	8.09377	1008.52	27383	1
5	2004	8	26.7052	86.7404	175.321	23.746	0.514603	104.497	8.09163	1008.73	27383	2
5	2004	9	26.7837	84.8918	112.332	14.9885	0.421103	109.641	7.99385	1009.49	27383	0
5	2004	10	26.5774	84.9132	105.574	20.1131	0.518885	95.9883	7.98957	1010.43	27383	1
5	2004	11	26.8708	83.9782	90.3707	16.1804	0.62309	88.2121	7.10311	1010.12	27383	2
5	2004	12	26.0757	81.002	38.3444	5.23167	0.727296	99.5099	6.121	1010.42	27383	0
5	2005	1	26.369	76.0486	13.6665	4.08257	0.835783	124.086	5.21099	1010.79	27578	0
5	2005	2	27.6573	71.0953	0	0	0.937847	147.835	3.6165	1010.91	27578	5
5	2005	3	27.9592	74.0716	58.0708	6.05962	0.731578	155.623	4.99616	1010.5	27578	1
5	2005	4	29.4602	72.0517	9.26144	6.90898	0.825078	165.531	4.89837	1009.5	27578	2
5	2005	5	27.9892	81.8727	200.155	19.8347	0.612385	119.614	6.99462	1007.94	27578	10
5	2005	6	27.4981	84.7634	273.549	19.8133	0.610244	107.045	6.99462	1007.59	27578	12
5	2005	7	27.3918	83.7855	118.826	16.9227	0.612385	110.651	7.60272	1008.75	27578	8
5	2005	8	27.4938	82.7863	256.314	19.8562	0.620949	117.956	7.794	1008.6	27578	4
5	2005	9	27.2897	83.8284	136.297	16.9013	0.410398	94.3638	7.01603	1008.91	27578	0
5	2005	10	26.3818	87.8895	278.011	24.938	0.316898	92.6887	8.49347	1009.57	27578	2
5	2005	11	26.2798	87.8895	308.093	18.8998	0.425385	77.5368	7.99385	1009.54	27578	0
5	2005	12	25.1742	88.953	364.255	21.0481	0.427526	72.5778	8.01526	1009.58	27578	0
5	2006	1	26.3711	81.002	83.168	11.0558	0.521026	104.868	5.99539	1010.14	27875	0
5	2006	2	26.9728	79.0249	143.011	12.0336	0.635937	143.098	5.01757	1010.37	27875	0
5	2006	3	28.0656	76.0272	31.4422	6.05962	0.629514	141.32	4.99616	1008.84	27875	1
5	2006	4	27.8764	80.9591	162.624	15.0313	0.421103	126.775	5.99539	1008.33	27875	1
5	2006	5	26.9899	85.8911	214.223	21.8332	0.410398	110.035	6.99462	1008.75	27875	5
5	2006	6	27.2876	84.8918	317.025	18.0076	0.319039	127.303	7.01603	1008.34	27875	1
5	2006	7	26.905	85.784	207.837	23.8103	0.512462	83.7684	7.99385	1008.73	27875	4
5	2006	8	26.8964	84.8062	247.702	18.9426	0.605962	122.479	7.01603	1008.7	27875	1
5	2006	9	26.8857	84.8918	296.095	19.9846	0.510321	123.316	7.01603	1009.57	27875	3
5	2006	10	26.4861	86.8689	150.83	21.876	0.310475	89.1792	6.99462	1010.64	27875	1
5	2006	11	26.6816	84.9561	89.42	20.006	0.316898	89.6845	5.99539	1009.55	27875	2
5	2006	12	26.4732	81.002	38.9673	12.2049	0.933565	96.7898	6.0168	1010.23	27875	1
5	2007	1	26.0757	80.0241	29.754	9.16437	0.729437	94.7778	6.0168	1011.48	28160	5
5	2007	2	26.8643	73.0938	24.2742	2.04128	0.631655	131.012	4.97475	1010.58	28160	0
5	2007	3	27.6744	75.028	129.488	10.9059	0.531732	160.072	5.97398	1009.23	28160	0
5	2007	4	28.0827	79.9599	112.642	13.9464	0.531732	129.079	5.97398	1008.92	28160	0
5	2007	5	27.4831	84.9132	286.34	19.1139	0.416821	107.33	6.99462	1008.4	28160	0
5	2007	6	27.6916	84.849	160.965	19.8347	0.512462	106.772	6.99462	1007.12	28160	3
5	2007	7	26.8029	86.7618	247.561	23.9173	0.516744	93.6094	7.99385	1008.42	28160	0
5	2007	8	26.905	84.742	229.281	19.8347	0.723014	110.537	7.97244	1008.33	28160	0
5	2007	9	26.8964	85.8054	307.434	20.9196	0.518885	99.4506	6.99462	1008.52	28160	0
5	2007	10	25.8908	89.8452	281.827	29.8271	0.421103	84.1138	7.99385	1009.05	28160	0
5	2007	11	25.7802	86.8903	178.32	15.0955	0.421103	87.2678	6.99462	1009.39	28160	0
5	2007	12	26.1756	81.9584	91.9375	11.0986	0.820796	94.7442	5.99539	1009.33	28160	1
5	2008	1	26.3711	82.0012	49.4585	8.1009	0.418962	95.0925	5.01757	1009.93	28486	0
5	2008	2	26.3797	77.9829	45.2123	4.10398	0.727296	113.112	5.99539	1010.4	28486	0
5	2008	3	27.1791	78.9821	62.2235	11.948	0.723014	130.166	4.99616	1008.88	28486	0
5	2008	4	27.2876	81.9155	115.539	14.86	0.514603	108.916	5.99539	1007.79	28486	2
5	2008	5	26.8986	85.8482	265.13	21.9617	0.506039	116.516	6.99462	1008.28	28486	2
5	2008	6	26.9007	85.8054	185.209	20.8554	0.510321	95.3109	6.99462	1008.51	28486	0
5	2008	7	27.0984	84.8062	140.969	18.8569	0.50818	102.273	6.99462	1008.4	28486	0
5	2008	8	27.2897	82.8505	145.178	18.9212	0.408257	118.829	5.99539	1008.27	28486	0
5	2008	9	26.601	85.8054	206.495	19.8133	0.605962	91.4896	6.99462	1009.19	28486	1
5	2008	10	26.8857	86.8689	110.287	21.9617	0.312616	100.496	6.99462	1009.26	28486	0
5	2008	11	26.0735	87.9538	298.961	18.0932	0.518885	74.958	7.99385	1008.83	28486	3
5	2008	12	25.5782	83.9782	52.9789	12.0764	0.527449	77.3697	6.99462	1010.03	28486	2
5	2009	1	25.2805	79.9813	35.2647	4.12539	0.822937	97.2366	5.01757	1011.35	28630	1
5	2009	2	27.3661	75.9844	14.0806	2.95487	0.618808	116.49	4.99616	1009.24	28630	0
5	2009	3	27.4767	79.9599	171.194	16.9013	0.523167	129.148	5.99539	1009.23	28630	0
5	2009	4	27.4874	82.9148	98.7494	15.9021	0.41468	115.826	5.99539	1008.51	28630	0
5	2009	5	27.2919	84.8918	195.261	20.0274	0.506039	94.1697	6.99462	1007.54	28630	0
5	2009	6	27.8086	81.7657	85.5478	10.9487	0.807949	111.658	5.99539	1008.33	28630	3
5	2009	7	27.3004	83.807	162.685	15.0099	0.703744	105.3	6.99462	1008.6	28630	0
5	2009	8	27.1962	84.7848	334.814	21.8974	0.603821	113.624	6.99462	1008.33	28630	2
5	2009	9	26.8029	85.784	217.632	19.899	0.708026	102.348	6.99462	1009.07	28630	0
5	2009	10	26.6902	85.8697	194.104	20.8982	0.605962	105.729	6.99462	1009.15	28630	0
5	2009	11	26.4882	84.8918	171.372	13.0114	0.527449	95.2075	6.0168	1008.97	28630	0
5	2009	12	26.2776	81.0234	22.8892	8.12231	0.516744	99.921	5.01757	1010.46	28630	1
5	2010	1	26.6773	79.0249	14.5115	6.14526	0.618808	106.588	5.01757	1010.94	28781	5
5	2010	2	27.7658	73.0723	52.4654	3.0191	0.916437	136.011	3.99692	1010.29	28781	0
5	2010	3	28.4652	74.0288	58.4136	5.99539	0.625232	161.669	4.99616	1009.91	28781	0
5	2010	4	28.8799	76.9622	85.8369	8.95026	0.616667	159.658	4.99616	1008.91	28781	7
5	2010	5	28.9927	80.8521	116.652	12.9686	0.418962	127.595	5.99539	1006.99	28781	32
5	2010	6	27.3068	84.8062	191.399	19.8562	0.410398	105.607	6.99462	1008.34	28781	11
5	2010	7	26.8029	85.8054	216.578	20.834	0.308334	100.322	6.99462	1008.2	28781	4
5	2010	8	27.0984	84.8276	155.691	17.9219	0.510321	101.342	6.99462	1008.23	28781	5
5	2010	9	27.0877	85.8697	264.785	26.8722	0.221257	111.946	6.99462	1008.34	28781	4
5	2010	10	26.4925	86.8689	290.863	22.8967	0.319039	90.2877	7.01603	1008.01	28781	0
5	2010	11	25.8758	88.953	358.708	25.045	0.119193	58.6741	7.99385	1008.46	28781	2
5	2010	12	25.8779	86.9331	222.947	17.0512	0.310475	72.5813	6.99462	1008.02	28781	5
5	2011	1	25.5739	84.9775	208.385	20.0489	0.418962	82.2517	7.01603	1009.38	29038	1
5	2011	2	27.1684	77.005	54.0913	6.90898	0.627373	106.271	5.01757	1009.27	29038	1
5	2011	3	26.3797	84.9347	532.816	18.0076	0.446796	77.2591	6.0168	1008.42	29038	3
5	2011	4	27.5809	81.9155	108.562	11.8837	0.425385	100.216	5.99539	1008.75	29038	2
5	2011	5	27.6916	83.8712	159.041	17.9648	0.418962	117.576	6.0168	1008.36	29038	0
5	2011	6	27.4003	85.784	106.307	18.8783	0.514603	80.3374	6.99462	1007.8	29038	1
5	2011	7	26.8029	85.8054	193.018	16.9013	0.418962	87.3314	6.99462	1008.05	29038	0
5	2011	8	26.8943	84.8276	234.726	18.9854	0.418962	108.973	7.01603	1008.65	29038	2
5	2011	9	26.501	86.8047	241.988	16.9655	0.416821	88.8017	7.01603	1009.16	29038	4
5	2011	10	26.5838	86.9117	117.653	20.006	0.316898	79.5245	6.99462	1008.92	29038	0
5	2011	11	26.5774	86.9117	200.518	17.094	0.331885	86.4842	6.99462	1008.76	29038	2
5	2011	12	25.9714	85.9339	177.734	15.1383	0.631655	72.223	6.03821	1009.54	29038	0
5	2012	1	26.2712	83.9782	184.481	13.1185	0.725155	75.2178	6.0168	1009.56	29243	1
5	2012	2	27.3725	78.0043	27.172	7.92962	0.438232	115.241	4.99616	1008.49	29243	0
5	2012	3	27.5809	79.9385	79.9334	12.055	0.527449	124.929	5.99539	1008.77	29243	1
5	2012	4	27.5916	82.872	177.127	16.8585	0.431809	99.3564	6.0168	1008.81	29243	1
5	2012	5	27.3111	85.7198	268.288	17.8577	0.329744	86.7867	6.0168	1007.73	29243	2
5	2012	6	27.4089	82.7221	163.145	10.9273	0.529591	89.5232	6.0168	1008.04	29243	0
5	2012	7	27.2091	84.6991	230.596	15.795	0.336168	89.1142	6.99462	1007.99	29243	1
5	2012	8	27.4025	82.7863	227.431	13.8822	0.431809	98.8781	6.0168	1008.9	29243	4
5	2012	9	26.4011	86.8261	230.886	24.8737	0.225539	75.9772	7.01603	1009.5	29243	6
5	2012	10	26.6816	85.9339	209.914	18.029	0.129898	89.9701	6.0168	1009.67	29243	1
5	2012	11	26.975	86.9545	119.785	16.1162	0.127757	75.0301	6.0168	1009.19	29243	0
5	2012	12	26.5817	85.9553	145.113	13.0756	0.231962	75.4912	6.0168	1009.22	29243	0
5	2013	1	26.773	82.0012	37.4062	8.05808	0.529591	96.9076	6.0168	1010.81	29330	2
5	2013	2	26.8729	80.0241	71.8903	8.05808	0.533873	95.4166	6.0168	1009.88	29330	5
5	2013	3	28.563	77.0264	19.959	2.99769	0.329744	149.855	4.01834	1009.81	29330	1
5	2013	4	28.2804	80.9591	127.85	12.9258	0.319039	110.759	5.99539	1008.26	29330	2
5	2013	5	27.885	83.9354	241.966	18.9212	0.219116	105.824	6.0168	1008.14	29330	25
5	2013	6	27.4003	84.849	227.155	18.8569	0.805808	85.3686	6.99462	1007.05	29330	37
5	2013	7	26.5967	86.8261	210.761	17.9648	0.703744	74.0637	7.01603	1007.94	29330	12
5	2013	8	26.7965	84.849	196.874	18.8783	0.805808	101.768	6.0168	1008.45	29330	2
5	2013	9	26.8964	85.8054	166.071	17.8791	1.00351	92.6844	6.99462	1008.71	29330	4
5	2013	10	26.3861	86.9117	141.958	22.0259	0.608103	88.2221	6.99462	1009.87	29330	1
5	2013	11	26.5774	85.9767	291.792	17.0726	0.521026	81.9819	6.0168	1008.56	29330	1
5	2013	12	25.8779	83.9782	113.811	8.14372	0.620949	90.3848	6.0168	1009.71	29330	0
5	2014	1	25.5782	78.0471	26.5549	5.14603	0.92286	104.13	5.03898	1011.73	29307	5
5	2014	2	26.6581	70.1389	0.0342571	0.0428214	1.12271	146.709	3.0191	1009.9	29307	6
5	2014	3	27.7658	71.0953	19.3608	2.93346	1.7094	171.13	3.0191	1010.05	29307	9
5	2014	4	27.9999	80.8307	196.059	13.7109	1.0185	130.071	5.97398	1008.99	29307	6
5	2014	5	27.7023	84.8276	183.564	18.8569	0.712308	108.25	5.99539	1008.4	29307	33
5	2014	6	27.5046	85.7626	165.987	15.9021	0.920719	85.4414	6.0168	1007.19	29307	13
5	2014	7	27.1113	85.7412	229.542	23.8103	0.814372	91.1091	6.99462	1008.35	29307	17
5	2014	8	26.8008	85.8054	339.581	22.8539	0.616667	85.9895	6.99462	1009.11	29307	12
5	2014	9	26.8879	85.8697	192.239	19.0282	0.614526	87.2664	6.99462	1009.45	29307	0
5	2014	10	26.4861	87.9109	213.353	21.0481	0.712308	89.7381	6.99462	1009.64	29307	2
5	2014	11	26.5817	87.9538	222.421	19.0496	0.516744	78.06	6.99462	1009.39	29307	10
5	2014	12	26.2819	86.9331	196.636	19.0924	0.827219	80.0591	6.0168	1009.85	29307	10
5	2015	1	26.0778	80.0241	15.5687	4.16821	1.112	101.989	4.03975	1011.49	29269	8
5	2015	2	26.1713	75.0494	2.6408	1.99846	1.11842	118.677	3.0191	1011.2	29269	10
5	2015	3	28.1676	73.0723	4.69782	0.999231	1.12057	155.755	3.0191	1010.7	29269	0
5	2015	4	28.4781	77.9829	58.8311	9.92808	0.914296	125.456	4.99616	1009.09	29269	1
5	2015	5	28.1912	82.8505	127.239	21.7476	0.712308	131.484	5.99539	1008.96	29269	5
5	2015	6	27.6916	84.849	164.84	13.9464	0.708026	85.9481	6.0168	1008.6	29269	5
5	2015	7	27.2026	86.7404	263.824	22.7896	0.812231	112.884	6.99462	1008.9	29269	5
5	2015	8	26.8922	86.8475	311.135	23.8103	0.708026	109.04	6.99462	1009.33	29269	1
5	2015	9	26.89	86.8689	281.399	20.941	0.605962	104.651	6.99462	1009.8	29269	1
5	2015	10	27.1769	86.9331	228.669	20.941	0.506039	101.85	6.99462	1010.67	29269	2
5	2015	11	26.4796	88.9744	302.731	24.9808	0.314757	81.533	6.99462	1009.67	29269	3
5	2015	12	26.6773	84.9989	99.6907	14.1177	0.718731	98.5213	5.01757	1011.19	29269	1
5	2016	1	27.3725	81.0234	35.3106	7.10167	0.918578	106.664	4.99616	1011.18	29226	13
5	2016	2	27.0706	76.0914	26.3917	5.10321	1.81574	120.29	4.03975	1011.58	29226	6
5	2016	3	28.9542	72.1159	0	0	1.12271	165.295	3.0191	1010.6	29226	3
5	2016	4	30.6571	70.0961	10.756	2.99769	1.01636	158.943	3.0191	1008.52	29226	0
5	2016	5	28.7928	80.9163	206	16.8799	0.62309	127.902	5.99539	1008.11	29226	0
5	2016	6	27.6958	82.8934	180.419	14.9671	0.614526	104.226	6.0168	1008.96	29226	1
5	2016	7	27.2876	85.8911	591.263	18.964	0.614526	84.1609	6.99462	1008.5	29226	1
5	2016	8	27.0092	86.7832	258.363	24.8095	0.812231	101.396	6.99462	1008.01	29226	19
5	2016	9	26.6095	86.8047	257.501	23.8745	0.812231	103.668	6.99462	1009.01	29226	15
5	2016	10	26.5945	87.8895	330.467	25.9158	0.712308	87.8296	7.97244	1008.54	29226	12
5	2016	11	26.9814	86.0195	114.023	14.2033	0.516744	81.8242	6.0168	1009.01	29226	13
5	2016	12	26.0757	86.9973	383.819	15.1598	0.62309	72.0232	6.0168	1009.31	29226	8
5	2017	1	25.8737	87.0188	497.433	21.0909	0.529591	61.7168	7.01603	1009.6	29216	6
5	2017	2	26.8686	79.0463	25.1541	10.0137	1.11628	95.4309	5.01757	1010.81	29216	15
5	2017	3	27.7722	78.0257	125.683	9.92808	0.720873	128.626	4.99616	1009.48	29216	2
5	2017	4	27.2854	84.9347	208.702	18.8141	0.71659	111.437	5.99539	1009.12	29216	6
5	2017	5	27.698	85.8482	178.722	22.7896	0.714449	89.0479	5.99539	1008.06	29216	17
5	2017	6	27.6002	84.8276	207.628	17.8577	0.799385	106.503	5.99539	1008.56	29216	7
5	2017	7	27.2983	85.8268	156.164	19.8776	0.705885	101.839	6.0168	1008.74	29216	12
5	2017	8	27.2961	85.8482	251.1	21.9189	0.805808	98.4242	6.0168	1008.3	29216	7
5	2017	9	27.1898	85.9125	280.703	22.8539	0.805808	104.939	6.99462	1008.9	29216	9
5	2017	10	27.4831	84.9347	164.567	15.9663	0.705885	109.788	5.99539	1008.69	29216	6
5	2017	11	26.4818	87.9538	387.767	22.9823	0.331885	70.7884	6.99462	1007.85	29216	7
5	2017	12	25.9779	84.0211	156.942	14.0535	0.918578	71.9197	5.03898	1009.78	29216	3
5	2018	1	26.0799	86.9545	207.554	17.9648	0.616667	72.9924	6.0168	1008.87	29122	3
5	2018	2	26.8729	77.0264	26.1777	3.99692	1.12057	110.79	3.99692	1010.49	29122	5
5	2018	3	28.072	76.0272	42.3509	6.93039	0.925001	129.037	3.0191	1009.17	29122	5
5	2018	4	28.174	78.0257	151.165	10.9487	0.916437	128.376	4.99616	1008.32	29122	7
5	2018	5	27.4874	84.9132	309.282	20.7697	0.610244	105.776	5.99539	1008.45	29122	23
5	2018	6	27.1962	85.8268	187.652	20.8554	0.812231	88.6503	6.99462	1008.56	29122	13
5	2018	7	27.0114	85.7412	232.121	21.8332	0.814372	99.2607	6.97321	1007.96	29122	19
5	2018	8	27.1049	85.784	227.202	18.8569	0.814372	91.0057	6.99462	1008.19	29122	14
5	2018	9	26.89	85.8697	201.711	22.9181	0.614526	98.2073	5.99539	1009.18	29122	7
5	2018	10	26.9814	85.9553	235.887	23.9173	0.614526	90.1128	6.97321	1010.01	29122	13
5	2018	11	26.6773	85.9981	37.2097	7.03744	0.325462	29.518	6.0168	1008.86	29122	3
5	2018	12	26.6795	85.9981	268.235	20.0274	0.620949	78.5603	6.0168	1009.92	29122	2
6	2002	1	26.1852	78.8201	17.9337	9.70974	2.68797	125.062	5.67445	1012.17	47782	6
6	2002	2	26.8785	75.8809	2.66916	1.20539	2.6845	144.761	4.8366	1012.92	47782	1
6	2002	3	27.7108	75.4094	47.6654	7.36622	2.00149	170.413	4.63859	1010.21	47782	1
6	2002	4	27.9958	79.1216	89.6175	9.22808	1.51738	145.687	5.64281	1009.03	47782	2
6	2002	5	27.8741	81.3995	123.014	13.7085	1.23797	128.847	6.66762	1008.67	47782	18
6	2002	6	27.9923	81.6054	127.269	14.7312	0.970722	113.901	7.0866	1008.17	47782	15
6	2002	7	27.9017	80.861	108.479	15.0962	1.34752	136.212	6.77605	1008.78	47782	4
6	2002	8	27.3117	81.4615	145.983	17.394	1.15732	116.382	7.68623	1009.02	47782	2
6	2002	9	27.101	83.4727	163.288	15.3192	0.893429	110.327	7.36117	1009.92	47782	7
6	2002	10	27.1072	85.2667	200.864	17.0227	0.8706	122.035	6.89156	1009.96	47782	3
6	2002	11	26.4096	86.072	511.045	21.4233	0.944049	94.7488	7.71092	1010.06	47782	6
6	2002	12	26.6007	84.433	430.535	18.7606	1.52085	102.147	7.03859	1011.5	47782	6
6	2003	1	26.8351	80.3263	95.5133	12.7895	1.86328	116.819	5.52779	1011.4	47279	6
6	2003	2	27.5001	76.0484	28.2167	5.54891	2.47991	126.705	4.36875	1010.96	47279	0
6	2003	3	28.1929	76.5769	111.146	10.7719	2.0608	139.199	5.051	1010.11	47279	0
6	2003	4	28.7423	75.433	24.4422	5.66276	1.32395	164.08	4.70894	1008.92	47279	0
6	2003	5	27.9501	82.6774	186.902	15.0735	1.12854	130.496	7.7098	1008.26	47279	0
6	2003	6	27.7251	81.9777	117.132	13.446	1.10571	125	6.39107	1008.6	47279	0
6	2003	7	27.1984	83.6166	131.393	16.7997	1.14678	114.784	8.00335	1009.14	47279	1
6	2003	8	27.5839	82.8337	115.958	13.0051	1.2273	116.869	7.30447	1008.95	47279	0
6	2003	9	27.0816	84.9057	171.749	19.948	0.947893	113.53	7.96762	1009.59	47279	0
6	2003	10	26.2661	87.9888	386.563	23.5019	0.817867	85.0764	8.57829	1009.97	47279	0
6	2003	11	26.5073	85.7221	355.955	15.7833	1.0407	96.2452	6.6309	1010.26	47279	1
6	2003	12	25.7819	82.9156	399.288	16.8479	2.0438	96.2637	6.8247	1011.62	47279	0
6	2004	1	26.7708	78.4094	47.721	10.5489	2.12668	126.843	4.63165	1011.26	46225	3
6	2004	2	26.9868	77.2879	71.5277	7.1432	2.18102	124.919	5.32718	1011.1	46225	0
6	2004	3	28.0929	77.505	42.873	6.51449	1.74628	146.955	5.56241	1009.82	46225	0
6	2004	4	28.5529	78.3499	41.2717	5.43975	1.40063	141.514	6.01191	1009.2	46225	0
6	2004	5	28.0573	80.9553	96.151	13.948	1.54405	127.307	7.24926	1008.6	46225	3
6	2004	6	27.3272	82.3287	103.678	13.7997	1.35633	110.742	7.58548	1009.4	46225	1
6	2004	7	26.8261	84.4119	185.513	15.9542	1.02246	111.69	8.21563	1008.88	46225	0
6	2004	8	27.3356	83.1724	126.702	17.2331	1.3309	114.998	7.717	1009.05	46225	1
6	2004	9	26.9011	84.8561	182.187	15.1369	1.10794	115.386	7.88437	1009.96	46225	0
6	2004	10	26.6795	84.639	240.354	23.1558	1.28747	103.999	7.37854	1010.94	46225	0
6	2004	11	26.929	83.8548	255.696	21.6921	1.71985	104.386	6.52171	1010.64	46225	0
6	2004	12	26.2591	81.2159	108.717	11.2876	2.15224	108.496	6.07072	1010.99	46225	0
6	2005	1	26.5375	76.6489	61.4423	6.21794	2.30993	132.265	4.70112	1011.4	45827	0
6	2005	2	27.6569	72.6601	1.78556	0.136924	2.35931	151.99	3.34678	1011.55	45827	0
6	2005	3	27.9352	75.299	113.921	7.44096	2.25335	160.874	4.42184	1011.15	45827	1
6	2005	4	29.2979	74.3834	15.0464	4.85052	1.69579	164.703	4.67593	1010.12	45827	2
6	2005	5	28.2383	81.495	144.268	15.588	1.13462	121.859	7	1008.33	45827	0
6	2005	6	27.9406	82.4007	188.716	14.7426	1.15633	103.954	6.71092	1007.88	45827	1
6	2005	7	27.6744	81.7618	108.501	14.8744	1.25025	119.024	7.65769	1009.05	45827	3
6	2005	8	27.8105	81.0508	126.9	16.0912	1.5103	125.355	7.51092	1008.91	45827	8
6	2005	9	27.5672	82.4839	157.974	14.7136	0.985237	106.315	7.36105	1009.2	45827	3
6	2005	10	26.4361	87.567	302.51	23.7199	0.906827	91.3116	8.44218	1009.95	45827	4
6	2005	11	26.3289	87.2779	602.313	16.6451	1.18015	80.7147	8	1009.97	45827	2
6	2005	12	25.1784	89.072	557.053	22.7148	1.56316	67.8379	8.07196	1010.09	45827	1
6	2006	1	26.6	84	111.021	12.7148	0.5	66.9	6	1010.75	45478	0
6	2006	2	26.9	84	227.271	13.2117	1	77.7	6	1011.16	45478	0
6	2006	3	27.7	81	39.3635	7.7148	0.7	101.7	5	1009.46	45478	6
6	2006	4	27.9	83	130.471	16.2801	0	99.8	5	1008.93	45478	0
6	2006	5	27.4	85	179.086	17.7934	0.9	79	7	1009.06	45478	0
6	2006	6	27.5	84	204.981	18.0924	1.4	89.8	7	1008.48	45478	1
6	2006	7	27.8	79	122.684	18.811	1.7	116.6	7	1008.61	45478	0
6	2006	8	27.9	78	174.452	17.9253	0.8	106.3	7	1008.48	45478	0
6	2006	9	27.3	83	235.282	20.1369	0.9	79.9	7	1009.71	45478	0
6	2006	10	27	85	175.795	18.5943	0.9	158.1	7	1011.01	45478	0
6	2006	11	27.2	86	291.741	20.4347	0.6	49.5	7	1010.32	45478	0
6	2006	12	26.7	85	205.086	17.8529	1.5	52.1	7	1011.28	45478	0
6	2007	1	26.3	86	108.197	13.9151	1.1	57.8	7	1012.51	44048	1
6	2007	2	26.8	79	11.9257	3.34859	1.1	91.5	5	1011.7	44048	6
6	2007	3	27.8	78	109.852	8.43975	0.8	115.5	5	1009.95	44048	1
6	2007	4	28.3	82	142.465	12.5829	0.7	104.8	5	1009.76	44048	2
6	2007	5	27.7	85	296	22.4296	0.7	77.1	7	1008.53	44048	12
6	2007	6	28	84	164.775	15.6565	1.1	88.8	7	1007.27	44048	10
6	2007	7	27.6	82	143.949	21.8744	1.6	81.7	7	1008.45	44048	1
6	2007	8	27.8	79	110.058	15.588	2.1	103.6	7	1008.3	44048	2
6	2007	9	27.7	81	170.176	19.2167	1.3	98.6	6	1008.28	44048	0
6	2007	10	26.5	87	464.544	25.8619	1	55.3	7	1009.18	44048	3
6	2007	11	26.3	86	445.401	18.1319	0.8	55.1	7	1009.98	44048	1
6	2007	12	26.5	84	173.876	13.7895	1	61.5	6	1010.16	44048	0
6	2008	1	26.4	85	182.384	11.2003	0.5	61.8	6	1010.71	43890	5
6	2008	2	26.5	81	63.8177	7.33724	1	79	6	1011.29	43890	5
6	2008	3	27.2	82	98.305	10.5829	0.7	93.7	5	1009.63	43890	14
6	2008	4	27.9	81	138.92	11.4335	0	93.1	5	1008.27	43890	2
6	2008	5	27.7	83	216.302	21.0861	0.9	81.7	7	1008.09	43890	5
6	2008	6	27.7	82	176.908	17.4335	1.4	86.4	7	1008.13	43890	7
6	2008	7	27.6	82	127.936	15.6389	1.7	98.2	7	1007.74	43890	6
6	2008	8	27.8	82	103.251	16.4637	1.2	110.9	7	1007.76	43890	9
6	2008	9	27.4	83	141.051	15.2903	1.7	91.2	7	1008.37	43890	14
6	2008	10	27.2	87	173.788	21.223	0.8	80.3	7	1008.92	43890	13
6	2008	11	25.8	92	823.858	21.0634	0.8	40.8	8	1008.75	43890	10
6	2008	12	25.6	89	146.641	14.0126	1.2	57.4	7	1010.31	43890	0
6	2009	1	25.3	85	92.3711	7.70346	1.6	74.7	6	1012.17	43657	3
6	2009	2	26.7	82	9.66708	1.8568	1	86.8	5	1009.84	43657	8
6	2009	3	27.4	85	129.18	14.3713	1	91.1	6	1009.52	43657	4
6	2009	4	27.9	86	207.838	13.7136	0.5	89.1	7	1008.46	43657	2
6	2009	5	28	86	165.656	20.8009	0.8	81.8	7	1007.31	43657	6
6	2009	6	29	79	54.0478	10.1306	2	122.3	5	1008.04	43657	3
6	2009	7	28	83	123.787	15.8454	1.9	96	7	1008.28	43657	3
6	2009	8	28.2	81	186.864	19.0974	2	105.9	7	1007.98	43657	0
6	2009	9	27.9	82	154.682	17.2344	1.6	99.6	7	1008.57	43657	5
6	2009	10	27.2	86	112.552	18.2344	1.1	89.5	7	1009.43	43657	3
6	2009	11	27	88	338.778	13.2978	2.1	74.4	7	1009.7	43657	0
6	2009	12	26.4	87	129.719	11.5665	1.2	72.6	6	1011.3	43657	2
6	2010	1	26.6	87	110.667	10.4804	1.3	84.3	6	1011.86	43571	7
6	2010	2	27.1	83	24.5678	3.43468	1	108.6	5	1011.3	43571	4
6	2010	3	27.8	82	71.5604	6.27385	1.1	112.3	5	1010.77	43571	12
6	2010	4	28.9	82	44.4862	7.3091	0.8	127.5	5	1009.63	43571	3
6	2010	5	29.4	81	122.659	12.7022	0.9	126.9	6	1007.31	43571	10
6	2010	6	28.5	82	175.273	16.0227	1.1	101.1	7	1008.18	43571	9
6	2010	7	27.8	83	164.868	16.7934	1.4	92.2	7	1008.16	43571	39
6	2010	8	28	82	136.34	16.2852	1.4	109.2	7	1008.23	43571	33
6	2010	9	27.3	86	167.433	23.5943	0.5	86	7	1008.53	43571	34
6	2010	10	27.2	86	279.236	20.7136	1	83.1	7	1008.15	43571	20
6	2010	11	25.9	93	796.368	26.7833	0.9	65.9	8	1009.01	43571	14
6	2010	12	26.1	91	408.362	18.7833	0.5	69.7	7	1008.63	43571	1
6	2011	1	25.6	90	417.609	21.7833	1	60.6	7	1010.17	43542	5
6	2011	2	26.7	85	45.302	4.50821	0.9	87.5	6	1010.21	43542	6
6	2011	3	26.4	90	1146.45	18.5716	1.4	72.5	7	1009.31	43542	4
6	2011	4	28	83	92.3746	9.00507	0.9	106.6	5	1009.44	43542	1
6	2011	5	28.3	84	168.553	17.4969	1.4	112.7	7	1008.39	43542	3
6	2011	6	28.3	83	117.919	15.7997	2.1	110.9	7	1007.74	43542	0
6	2011	7	27.7	84	130.213	14.6451	2.5	111.2	8	1007.96	43542	0
6	2011	8	27.5	84	206.275	19.0685	1.8	113.3	8	1008.57	43542	0
6	2011	9	27.4	85	152.68	16.2915	2.3	110.8	8	1008.93	43542	0
6	2011	10	26.8	89	274.033	20.7085	1.6	90.3	8	1009.2	43542	0
6	2011	11	26.7	89	356.544	19.6526	2	79.7	8	1009.35	43542	0
6	2011	12	26	90	301.828	19.1381	2.5	64.6	8	1010.29	43542	0
6	2012	1	26.2	88	691.129	16.5665	1.8	77.3	8	1010.31	43584	1
6	2012	2	27.1	84	18.5127	6.01135	1.6	103.2	6	1009.5	43584	1
6	2012	3	27.7	83	113.203	13.5094	1.2	113.2	7	1009.34	43584	0
6	2012	4	28	85	98.5994	13.4335	1.1	113.3	7	1009.07	43584	0
6	2012	5	28.4	82	128.664	14.7073	2.3	130.9	7	1007.48	43584	0
6	2012	6	28.4	80	98.6403	9.35366	3	131.8	7	1007.87	43584	3
6	2012	7	28.3	80	126.973	10.7187	2.8	123.7	7	1007.84	43584	5
6	2012	8	28.5	80	166.134	10.8681	2.7	142.4	7	1008.77	43584	2
6	2012	9	27.6	85	168.701	21.7997	2.4	101.5	8	1009.26	43584	0
6	2012	10	26.9	89	224.351	18.8694	1.5	87	7	1009.95	43584	3
6	2012	11	26.9	91	279.814	19.5665	1.1	66.2	8	1009.67	43584	2
6	2012	12	26.7	89	326.569	15.4233	1.8	60.1	8	1009.77	43584	1
6	2013	1	26.7	87	65.7747	9.64634	1.6	81.3	7	1011.64	43598	8
6	2013	2	26.7	86	121.374	9.7148	1.8	85.6	8	1010.69	43598	17
6	2013	3	27.9	84	11.9608	3.06846	1.4	122.3	6	1010.56	43598	8
6	2013	4	28.4	84	215.97	11.1483	1.1	116.8	7	1008.5	43598	4
6	2013	5	28.4	85	251.742	16.9429	1.2	109.7	8	1008.24	43598	5
6	2013	6	28.3	83	131.552	15.6389	3.1	107.7	8	1007.09	43598	10
6	2013	7	27.5	84	162.44	17.4284	2.8	103.2	8	1007.93	43598	3
6	2013	8	27.8	82	146.599	15.5258	3.3	126.8	7	1008.45	43598	6
6	2013	9	27.7	83	114.765	14.8681	3.3	109.7	8	1008.8	43598	2
6	2013	10	26.8	88	198.399	23.2801	1.9	91.4	8	1010.25	43598	7
6	2013	11	26.8	89	727.201	19.2179	2.3	74	8	1009.33	43598	7
6	2013	12	26.2	86	240.564	12.0697	4.5	86.2	8	1010.73	43598	0
6	2014	1	25.6	85	161.604	9.34352	2.4	84.7	8	1012.91	43533	2
6	2014	2	26	82	0.935101	1.28013	1.8	106	6	1011.27	43533	2
6	2014	3	27.3	81	7.18151	1.21673	1.6	141.3	5	1011.36	43533	5
6	2014	4	28.5	82	73.2904	5.88456	1.5	125.2	7	1009.62	43533	1
6	2014	5	28.4	84	190.242	15.0227	1.5	119	7	1008.75	43533	3
6	2014	6	28.7	82	123.211	13.5767	3.5	122.7	8	1007.34	43533	5
6	2014	7	28.6	80	133.919	19.0164	4.2	128	8	1008.45	43533	10
6	2014	8	27.9	84	222.404	19.0227	2.8	114.4	8	1009.29	43533	11
6	2014	9	27.4	86	146.042	19.7324	2.4	115.7	8	1009.69	43533	12
6	2014	10	26.9	89	290.481	22.6463	1.9	84.9	8	1010.23	43533	17
6	2014	11	26.8	91	334.544	20.8517	1.5	62.8	8	1010.26	43533	12
6	2014	12	26.5	90	449.944	21.9265	2.8	61.4	8	1010.92	43533	5
6	2015	1	26.2	87	50.2152	8.98358	2.4	87.3	7	1012.73	43500	6
6	2015	2	25.8	85	11.4251	1.93154	2.4	94.4	6	1012.59	43500	3
6	2015	3	27.5	82	2.18432	1.06846	2.1	132.9	6	1012.06	43500	2
6	2015	4	28.5	83	90.7103	8.07981	1.6	117.6	7	1010.2	43500	1
6	2015	5	28.7	83	90.9358	15.3016	1.8	127.9	7	1009.45	43500	4
6	2015	6	28.2	84	100.348	12.446	2.2	106.6	8	1008.91	43500	3
6	2015	7	28.3	82	155.83	17.171	3.9	127	7	1009.15	43500	2
6	2015	8	27.5	86	239.497	18.6741	2.4	108.4	8	1009.67	43500	2
6	2015	9	27.5	87	191.934	19.3091	2.3	103.9	8	1010.14	43500	5
6	2015	10	27.2	89	285.074	20.1991	1.7	82.4	8	1011.29	43500	1
6	2015	11	26.7	92	466.18	25	1.8	51.6	8	1010.55	43500	4
6	2015	12	26.9	89	276.871	17.5665	2.1	72	7	1012.23	43500	21
6	2016	1	27.3	87	83.6744	9.78955	2	96.7	6	1012.5	43457	9
6	2016	2	26.9	86	81.0241	7.92647	2.7	85.6	7	1013.06	43457	3
6	2016	3	27.9	82	0	0	1.7	130.4	5	1012	43457	4
6	2016	4	29.7	79	4.09623	2.93154	2.1	156.7	5	1009.67	43457	2
6	2016	5	29.2	82	106.225	13.5943	2.5	134.7	7	1008.64	43457	2
6	2016	6	28.3	82	144.312	14.4969	2.3	116.2	8	1009.21	43457	1
6	2016	7	27.8	86	302.665	17.9492	2	102.4	8	1008.85	43457	5
6	2016	8	28.3	83	121.557	19.7426	4	120.1	7	1008.08	43457	7
6	2016	9	28.1	82	164.794	20.1835	3.9	118.1	8	1008.96	43457	4
6	2016	10	27.3	88	287.969	23.5321	3.2	79.7	8	1008.85	43457	11
6	2016	11	27.2	91	263.236	19.9899	2.2	70.1	8	1009.94	43457	13
6	2016	12	26.3	91	817.053	19.9836	3.2	56.4	8	1010.25	43457	14
6	2017	1	25.9	93	1224.45	23.858	2.6	46.3	8	1010.57	43318	4
6	2017	2	26.6	87	82.143	10.5031	2.4	83.6	7	1012.03	43318	10
6	2017	3	27.5	84	96.5465	8.21673	2.4	106.4	6	1010.63	43318	6
6	2017	4	28	87	189.089	13.948	2.3	103.2	6	1009.89	43318	7
6	2017	5	28.7	85	126.772	17.6502	3	113	8	1008.45	43318	5
6	2017	6	28.8	81	155.915	14.2965	3.4	123.8	7	1008.84	43318	4
6	2017	7	28.3	83	118.808	17.0051	3.4	110	8	1009	43318	5
6	2017	8	28.1	84	180.207	19.806	3.4	116.7	7	1008.55	43318	4
6	2017	9	27.8	85	190.274	18.8173	2.5	91.6	8	1009.31	43318	2
6	2017	10	27.7	86	132.733	15.1546	2.6	101.1	8	1009.39	43318	2
6	2017	11	26.6	91	775.241	23.0685	3.2	77.9	8	1008.63	43318	3
6	2017	12	26.2	89	422.049	15.8517	3.8	71.9	8	1010.74	43318	2
6	2018	1	26.2	89	221.871	17.223	1.8	57.3	8	1009.79	43152	2
6	2018	2	26.5	83	17.6326	3.93154	2	96.1	6	1011.86	43152	4
6	2018	3	27.6	83	83.192	5.21673	1.9	124.8	6	1010.22	43152	1
6	2018	4	28	84	102.139	9.78833	1.9	109.8	6	1009.39	43152	4
6	2018	5	28	87	183.94	14.8732	1.6	101.7	7	1009	43152	8
6	2018	6	28.1	84	138.423	17.1596	2.5	106.5	8	1008.73	43152	17
6	2018	7	28.6	81	145.145	17.3826	4.7	126.3	7	1007.87	43152	7
6	2018	8	28.6	82	114.83	15.2281	4.7	114.4	7	1008.19	43152	10
6	2018	9	27.4	85	185.285	20.5321	2.6	98.9	7	1009.39	43152	5
6	2018	10	27.2	88	290.452	22.0798	2	86.9	7	1010.71	43152	11
6	2018	11	26.5	91	157.523	8.1432	2.1	28.9	7	1009.91	43152	4
6	2018	12	27	90	541.209	21.2117	1.7	85.1	7	1010.95	43152	15
7	2002	1	26.4083	77.3832	19.4932	9.87932	3.28643	134.3	5.19328	1011.76	84506	8
7	2002	2	27.0808	74.2862	2.49533	1.25151	3.13937	153.216	4.37956	1012.51	84506	13
7	2002	3	27.9271	74.3957	50.9761	7.33745	2.27011	172.321	4.48951	1009.93	84506	14
7	2002	4	28.2014	79.0198	88.0167	9.04708	1.62145	144.632	5.69412	1008.77	84506	9
7	2002	5	28.033	81.3539	121.387	13.7566	1.38517	128.803	6.61497	1008.58	84506	19
7	2002	6	27.9958	81.8842	128.903	14.5522	1.13483	113.348	7.03271	1008.3	84506	86
7	2002	7	27.8778	81.3096	106.644	14.767	1.63857	131.371	6.73928	1008.84	84506	95
7	2002	8	27.2194	82.4368	147.457	17.0206	1.2515	111.896	7.81777	1009.12	84506	12
7	2002	9	26.924	84.3377	157.507	14.9265	0.982119	106.094	7.40816	1010.03	84506	53
7	2002	10	27.0376	85.5936	201.336	16.7956	0.906147	118.311	6.82757	1009.92	84506	107
7	2002	11	26.4946	85.9643	533.62	21.5235	1.08616	91.7649	7.56183	1009.97	84506	78
7	2002	12	26.7377	84.217	458.625	19.0551	1.72575	101.769	6.76656	1011.15	84506	35
7	2003	1	26.9158	79.0494	106.018	12.8609	2.28264	123.296	5.03181	1011.48	84502	15
7	2003	2	27.6019	74.5549	27.6638	5.79338	2.84498	134.612	4.19904	1010.77	84502	11
7	2003	3	28.3269	75.6644	113.822	10.9529	2.25579	146.532	4.95196	1009.96	84502	4
7	2003	4	28.8122	75.1635	25.2173	5.46836	1.37675	159.627	4.79714	1008.82	84502	2
7	2003	5	28.007	82.6346	185.081	14.9714	1.32994	125.766	7.57174	1008.25	84502	2
7	2003	6	27.7348	82.0913	120.316	13.3191	1.27536	123.326	6.36257	1008.62	84502	2
7	2003	7	27.1861	83.892	130.081	16.636	1.27946	111.627	8.02908	1009.17	84502	1
7	2003	8	27.502	83.4835	112.02	12.8875	1.30583	109.895	7.32451	1009.01	84502	1
7	2003	9	27.0111	85.2339	171.426	19.7015	1.08024	105.908	7.84547	1009.63	84502	0
7	2003	10	26.2549	88.0456	388.03	23.3824	0.923877	82.5481	8.54619	1009.97	84502	2
7	2003	11	26.5984	85.6124	371.996	15.8507	1.18916	96.1972	6.43186	1010.14	84502	1
7	2003	12	25.9685	82.0084	424.571	17.1697	2.45713	100.818	6.52892	1011.47	84502	0
7	2004	1	26.9994	76.9146	48.9065	10.7934	2.58167	132.563	4.07868	1011.06	84087	1
7	2004	2	27.1687	76.2155	79.4855	7.17791	2.51904	128.443	4.77555	1010.92	84087	1
7	2004	3	28.259	76.7536	42.0512	6.40291	1.92514	146.083	5.23602	1009.71	84087	0
7	2004	4	28.6163	78.2449	40.7782	5.30883	1.44112	137.419	5.74462	1009.13	84087	0
7	2004	5	28.0927	81.1291	97.5412	13.7015	1.68081	123.714	7.09401	1008.61	84087	0
7	2004	6	27.213	83.6764	102.996	13.636	1.60612	103.893	7.51589	1009.44	84087	0
7	2004	7	26.7229	85.4347	178.803	15.7117	1.25568	105.301	8.27955	1008.92	84087	0
7	2004	8	27.3068	83.8275	123.274	16.9346	1.67623	109.75	7.54143	1009.1	84087	0
7	2004	9	26.8741	85.4991	182.282	15.1677	1.26088	111.06	7.83115	1009.96	84087	0
7	2004	10	26.7436	84.8007	242.508	23.1984	1.50446	104.286	7.09126	1010.88	84087	4
7	2004	11	27.0361	83.3193	268.311	21.9713	2.06968	107.246	6.09497	1010.5	84087	11
7	2004	12	26.3925	80.5186	121.404	11.4785	2.64559	111.033	5.69581	1010.84	84087	9
7	2005	1	26.7567	75.5217	63.4421	6.27199	2.69065	136.079	4.26868	1011.2	84227	14
7	2005	2	27.957	71.3157	1.67211	0.167673	2.68127	155.784	3.00993	1011.4	84227	9
7	2005	3	28.1765	74.063	123.195	7.43152	2.76241	163.888	4.10227	1010.99	84227	10
7	2005	4	29.4057	74.3219	14.8982	4.81185	1.88563	161.824	4.5801	1010.03	84227	11
7	2005	5	28.2108	82.1929	143.068	15.3743	1.3149	114.533	7	1008.34	84227	29
7	2005	6	27.8803	83.5338	183.455	14.45	1.38474	93.0246	6.55113	1007.91	84227	23
7	2005	7	27.6147	82.7331	111.132	14.7301	1.50513	115.777	7.59852	1009.08	84227	24
7	2005	8	27.7453	82.2354	121.762	15.8794	1.80182	120.171	7.36183	1008.94	84227	72
7	2005	9	27.545	83.2386	156.61	14.6442	1.23497	104.437	7.30621	1009.22	84227	54
7	2005	10	26.4199	87.9968	308.389	23.6544	1.11356	89.3507	8.43696	1009.92	84227	80
7	2005	11	26.3395	87.4945	607.036	16.5603	1.35955	81.3093	8	1009.89	84227	22
7	2005	12	25.2588	88.8039	584.202	22.7669	2.0678	70.1635	7.80388	1009.95	84227	1
7	2006	1	27.0758	82.296	117.02	12.7669	0.720004	85.7087	5.85808	1010.79	84602	0
7	2006	2	27.2195	82.8643	234.443	13.2617	1.29096	85.8277	5.85808	1011.28	84602	1
7	2006	3	28.0267	80.1482	40.0314	7.76687	0.813497	110.602	4.92904	1009.43	84602	0
7	2006	4	28.0775	82.0768	127.891	16.3456	0.191656	88.7055	5	1008.86	84602	4
7	2006	5	27.5918	84.2897	178.736	17.6258	0.630114	97.1859	6.5739	1009.06	84602	5
7	2006	6	27.6421	83.7868	210.74	18.0021	0.952579	96.0131	7	1008.54	84602	3
7	2006	7	27.8924	81.2721	116.284	18.5338	1.13185	113.782	7.07096	1008.81	84602	0
7	2006	8	27.9853	79.2779	176.54	17.9059	0.941916	120.218	7	1008.85	84602	1
7	2006	9	27.1935	84.0651	234.126	20.1677	1.1343	85.1039	7	1010.24	84602	5
7	2006	10	27.1207	85	187.452	18.3845	1.07037	129.278	6.92904	1011.4	84602	0
7	2006	11	27.2	86.7103	301.841	20.4213	0.699341	70.7588	6.92904	1010.6	84602	5
7	2006	12	26.8917	85.0713	221.342	18.0572	1.80526	76.597	6.43199	1011.45	84602	2
7	2007	1	26.4633	86.2136	115.91	14.1308	1.73188	83.4536	6.36103	1012.61	84464	2
7	2007	2	27.0272	78.8584	11.4118	3.42942	2.08695	112.673	4.78713	1011.96	84464	3
7	2007	3	27.8639	79.0654	111.386	8.30883	1.37514	128.131	4.92904	1010.28	84464	0
7	2007	4	28.4633	81.929	144.817	12.4867	1.11184	118.156	5	1009.92	84464	1
7	2007	5	27.7426	85.071	293.676	22.5337	1.04794	95.6117	7	1009.12	84464	16
7	2007	6	27.9716	84.568	166.422	15.4581	1.0929	98.8126	6.5739	1007.33	84464	19
7	2007	7	27.6994	81.8577	142.089	21.7301	1.77044	101.143	7	1008.4	84464	17
7	2007	8	27.7503	79.9228	108.889	15.3743	2.24206	105.169	7	1008.31	84464	5
7	2007	9	27.7426	81.8518	168.604	19.1493	1.88231	106.248	6.49706	1008.4	84464	2
7	2007	10	26.5994	86.7868	455.322	25.7096	1.44029	69.8353	7.07096	1009.18	84464	3
7	2007	11	26.3923	86.2842	459.27	18.2801	1.15504	68.4631	6.50294	1009.83	84464	12
7	2007	12	26.6491	84.5684	183.067	13.8609	1.97989	81.9564	5.92904	1009.9	84464	6
7	2008	1	26.5704	84.9294	202.343	11.364	1.42305	89.293	5.85808	1010.54	84851	10
7	2008	2	26.7485	80.8584	65.6614	7.53164	1.95147	99.5836	5.43199	1011.09	84851	5
7	2008	3	27.413	82.0004	98.4781	10.4867	1.59467	109.696	5.35514	1009.48	84851	2
7	2008	4	28.0918	81.568	141.36	11.2986	1.03676	107.92	5.07096	1008.12	84851	2
7	2008	5	27.6716	83.1419	213.46	20.9919	1.38996	99.3671	7	1008.2	84851	14
7	2008	6	27.5367	83.136	168.032	17.2986	1.62014	93.906	7	1008.33	84851	19
7	2008	7	27.4793	82.639	125.187	15.5501	1.92014	107.027	7	1008.06	84851	25
7	2008	8	27.6438	82.4971	108.125	16.2271	1.44853	117.078	6.50294	1008.03	84851	12
7	2008	9	27.4	82.3607	140.602	15.1207	2.07639	101.525	7	1008.71	84851	11
7	2008	10	27.3065	85.7217	182.12	21.1595	1.37522	87.209	7	1009.08	84851	10
7	2008	11	25.9562	90.793	854.023	21.1963	1.12658	47.992	8	1008.9	84851	10
7	2008	12	25.813	87.6511	158.314	14.0205	1.39868	62.5671	7.35514	1010.28	84851	7
7	2009	1	25.5769	83.8643	101.489	7.86908	2.13953	85.7952	5.85808	1012.02	85067	5
7	2009	2	27.0763	80.4382	9.92083	1.82209	1.58221	99.3803	4.43199	1009.75	85067	2
7	2009	3	27.5349	83.9349	127.152	14.225	1.52551	98.3488	6.4261	1009.5	85067	4
7	2009	4	28.0278	84.5798	216.317	13.6442	1.50128	104.246	6.92904	1008.47	85067	2
7	2009	5	27.9361	85.1478	169.818	20.7587	1.38944	91.7906	7	1007.37	85067	26
7	2009	6	28.8651	77.4375	51.6275	10.1574	2.49003	131.532	5	1008.15	85067	37
7	2009	7	27.9787	80.8695	123.106	15.9243	2.48235	106.218	7	1008.4	85067	6
7	2009	8	28.1858	80.0055	183.42	18.8896	3.01554	116.055	7	1008.08	85067	9
7	2009	9	27.9355	80.5085	155.497	17.0573	2.52319	109.18	7.4261	1008.75	85067	0
7	2009	10	27.3492	83.4434	110.889	18.0573	2.03738	103.049	7	1009.56	85067	2
7	2009	11	26.9787	87.361	350.19	13.2536	1.87986	71.1747	7	1009.63	85067	3
7	2009	12	26.7976	84.4441	138.598	11.7014	2.24375	83.6456	5.78713	1011.26	85067	4
7	2010	1	27.09	84.018	114.8	10.7095	2.0029	91.3695	5.85808	1011.81	85403	5
7	2010	2	27.6325	80.4441	23.2214	3.42128	1.8236	112.389	4.85808	1011.23	85403	5
7	2010	3	28.3822	79.5151	72.2301	6.33535	1.98051	128.445	4.92904	1010.71	85403	3
7	2010	4	29.3971	79.5147	42.1093	7.1514	1.9362	140.92	5.4261	1009.59	85403	0
7	2010	5	29.6486	78.8695	123.287	12.7464	1.65275	138.915	5.92904	1007.33	85403	7
7	2010	6	28.4858	81.0055	173.371	15.7956	1.84565	103.323	7	1008.36	85403	8
7	2010	7	27.7574	82.4316	162.415	16.6258	1.61305	102.469	7.07096	1008.33	85403	43
7	2010	8	27.9787	81.2897	134.888	16.2331	1.60595	112.914	7	1008.37	85403	65
7	2010	9	27.4136	84.7927	162.432	23.3845	1.0965	95.2663	7	1008.65	85403	84
7	2010	10	27.2781	84.2246	278.624	20.6442	1.41897	89.7101	7.4261	1008.19	85403	34
7	2010	11	26.1485	90.5147	820.327	26.8507	1.16268	64.1736	8	1008.84	85403	17
7	2010	12	26.0361	89.4379	422.117	18.8507	0.89761	65.0835	7.4261	1008.57	85403	6
7	2011	1	26.0829	86.2368	425.18	21.8507	1.79522	70.0913	7.35514	1010.05	85602	0
7	2011	2	27.1474	82.089	45.634	4.39267	1.63845	97.8514	5.78713	1010.1	85602	3
7	2011	3	26.819	86.9467	1174.5	18.589	1.93967	78.4638	7	1009.12	85602	2
7	2011	4	28.2557	81.4379	90.9719	8.88755	1.36154	113.153	4.92904	1009.33	85602	1
7	2011	5	28.4562	81.8695	167.869	17.4949	1.61305	120.611	6.50294	1008.4	85602	0
7	2011	6	28.3639	80.9405	118.087	15.636	2.14974	118.697	7	1007.84	85602	3
7	2011	7	27.6716	82.3666	127.64	14.5603	2.12368	130.29	7.50294	1008.07	85602	1
7	2011	8	27.3722	82.7927	204.274	19.0838	1.80713	112.144	7.50294	1008.63	85602	1
7	2011	9	27.329	83.3666	147.578	16.2434	2.1154	106.171	7.50294	1009.05	85602	5
7	2011	10	26.8568	86.5857	281.657	20.7566	1.52188	91.9961	7.50294	1009.19	85602	2
7	2011	11	26.7994	87.296	359.965	19.6933	1.6946	82.5183	7.43199	1009.29	85602	4
7	2011	12	26.071	88.5092	305.027	19.2904	1.96732	64.3997	7.85808	1010.17	85602	0
7	2012	1	26.342	86.296	709.105	16.7014	1.67927	73.7836	7.43199	1010.21	85968	4
7	2012	2	27.4905	81.2309	18.5812	5.89779	1.71357	107.914	4.93493	1009.26	85968	1
7	2012	3	27.8918	81.0827	113.747	13.5154	1.32783	115.308	6.00589	1009.23	85968	2
7	2012	4	28.0497	82.7986	94.4952	13.2986	1.27044	113.477	6.50294	1008.97	85968	1
7	2012	5	28.3574	80.0824	122.07	14.6339	2.24323	123.345	6.50294	1007.58	85968	3
7	2012	6	28.2722	77.5144	95.67	9.31697	2.70893	132.688	6.43199	1008	85968	3
7	2012	7	28.1296	77.3721	122.63	10.5317	2.56573	126.08	7	1008.01	85968	4
7	2012	8	28.3367	76.8041	161.717	10.7199	2.65036	146.287	6.50294	1008.9	85968	3
7	2012	9	27.4083	81.7331	165.284	21.636	2.43558	107.48	7.50294	1009.45	85968	8
7	2012	10	27.0846	86.5147	223.712	18.8426	1.39349	90.5634	6.92904	1009.78	85968	3
7	2012	11	27.1343	87.5916	288.587	19.7014	1.34856	74.3297	7.43199	1009.49	85968	15
7	2012	12	26.7923	87.7221	333.469	15.5235	1.64375	65.2183	7.43199	1009.61	85968	7
7	2013	1	27.0479	84.089	67.0095	9.68303	1.80588	85.8919	6.00589	1011.54	86319	11
7	2013	2	27.1118	83.4441	122.832	9.76687	1.92772	91.0157	7.00589	1010.48	86319	10
7	2013	3	28.2834	81.4441	11.7754	3.08384	1.73371	127.247	5.00589	1010.41	86319	6
7	2013	4	28.6201	82.864	218.15	11.0655	1.41956	117.844	7	1008.35	86319	10
7	2013	5	28.5775	83.5798	250.168	16.8139	1.49827	111.553	7.50294	1008.13	86319	12
7	2013	6	28.4562	81.2956	126.748	15.5501	2.83022	113.147	7.5739	1007.07	86319	15
7	2013	7	27.5639	82.2956	160.855	17.411	2.78588	106.354	8	1007.95	86319	10
7	2013	8	27.729	81.2188	143.08	15.3007	2.85268	124.805	7	1008.5	86319	13
7	2013	9	27.7142	81.7927	111.647	14.7199	2.76746	99.0893	8	1008.8	86319	6
7	2013	10	26.9136	86.2246	202.787	23.3456	1.94264	91.3784	7.92904	1010.24	86319	4
7	2013	11	26.9775	87.4379	742.573	19.272	1.88103	71.2578	7.50294	1009.17	86319	6
7	2013	12	26.2994	86.4974	244.233	12.2065	2.9945	75.9434	7.85808	1010.53	86319	3
7	2014	1	25.9621	83.2963	165.781	9.54187	2.25784	90.5339	7.29007	1012.76	86466	2
7	2014	2	26.3408	80.1544	0.96748	1.34558	1.96324	110.606	4.50883	1011.07	86466	2
7	2014	3	27.6834	78.7993	6.54578	1.1493	1.95493	143.811	4.00589	1011.16	86466	3
7	2014	4	28.6847	80.7217	66.9472	5.50521	1.74856	132.663	6.07685	1009.54	86466	4
7	2014	5	28.6344	83.0768	189.703	14.7956	1.69886	123.311	7	1008.7	86466	1
7	2014	6	28.5864	81.5739	121.435	13.4765	3.06691	118.774	7.92904	1007.34	86466	6
7	2014	7	28.4793	79.6449	129.163	18.7853	3.52548	124.272	7.92904	1008.45	86466	15
7	2014	8	27.9355	81.9405	215.645	18.7956	2.79297	126.452	7.50294	1009.28	86466	14
7	2014	9	27.5562	83.3015	143.131	19.6749	2.61308	113.67	7.50294	1009.74	86466	12
7	2014	10	26.9355	87.5088	294.299	22.683	2.08467	86.5685	8	1010.14	86466	15
7	2014	11	26.7432	89.864	338.414	20.9345	1.6136	65.5541	7.92904	1010.11	86466	7
7	2014	12	26.5497	89.1482	458.783	22.0286	2.35258	65.5598	7.92904	1010.66	86466	4
7	2015	1	26.4911	84.7993	52.1416	9.21467	2.41412	89.0222	6.36103	1012.58	86558	4
7	2015	2	26.361	81.6632	11.6981	1.91616	2.44247	99.3173	4.50883	1012.4	86558	4
7	2015	3	27.9402	79.2312	2.10757	1.08384	2.19934	134.409	5.00589	1011.87	86558	4
7	2015	4	28.7059	81.154	92.029	7.98162	1.73489	118.457	6.50294	1010	86558	2
7	2015	5	28.8065	82.0768	89.5154	15.0185	1.70059	131.223	6.92904	1009.36	86558	4
7	2015	6	28.1361	83.1478	96.9022	12.3191	2.03669	102.474	7.92904	1008.87	86558	4
7	2015	7	28.158	82.2129	149.734	16.861	3.49533	118.67	7	1009.12	86558	12
7	2015	8	27.6136	84.2246	233.89	18.3662	2.41426	103.508	7.50294	1009.57	86558	13
7	2015	9	27.6562	85.1537	186.588	19.1514	2.42077	104.824	7.50294	1010.05	86558	6
7	2015	10	27.2923	87.4379	287.071	20.2413	1.72842	84.9842	8	1011.17	86558	1
7	2015	11	26.7568	90.225	472.78	25	1.80706	55.5532	7.92904	1010.31	86558	15
7	2015	12	27.1627	86.9412	284.094	17.7014	2.09283	69.3627	6.43199	1011.99	86558	1
7	2016	1	27.6266	84.7993	85.9166	9.86094	2.15611	96.5758	5.43199	1012.24	86507	10
7	2016	2	27.5391	83.2312	83.3163	8.02862	2.82765	91.5822	5.93493	1012.74	86507	5
7	2016	3	28.4467	79.2312	0	0	2.18989	134.466	4.00589	1011.72	86507	1
7	2016	4	30.0337	77.0121	3.76696	2.91616	2.26334	149.235	4.5739	1009.42	86507	2
7	2016	5	29.3136	80.6507	101.338	13.3845	2.52845	123.679	7	1008.54	86507	2
7	2016	6	28.2716	81.6449	143.319	14.4949	2.24323	108.552	7.50294	1009.2	86507	2
7	2016	7	27.8568	84.7217	286.731	17.8242	2.04974	99.2183	7.50294	1008.77	86507	2
7	2016	8	28.3	81.4375	114.77	19.45	3.65213	121.599	7.07096	1008.07	86507	11
7	2016	9	28.1782	79.5853	159.297	19.8815	3.83617	119.208	7.5739	1008.96	86507	12
7	2016	10	27.6764	84.0232	284.708	23.3109	3.35632	94.811	8	1008.8	86507	10
7	2016	11	27.2497	88.8699	267.924	20.2249	1.98695	76.8808	7.92904	1009.72	86507	18
7	2016	12	26.4065	89.7221	835.405	20.2147	2.43306	54.1112	8	1010.01	86507	10
7	2017	1	26.2479	90.657	1249.28	23.9448	2.33721	48.2706	7.92904	1010.29	86664	10
7	2017	2	27.0189	84.7993	85.1558	10.5051	2.42835	84.9392	6.43199	1011.81	86664	8
7	2017	3	27.7911	82.154	95.5359	8.1493	2.25798	108.287	5.50294	1010.41	86664	6
7	2017	4	28.0285	85.6507	188.801	13.7015	2.13673	101.957	6.07096	1009.72	86664	2
7	2017	5	28.5935	84.2188	125.684	17.4479	2.40357	97.3272	7.5739	1008.52	86664	6
7	2017	6	28.4308	81.2129	152.751	14.1309	2.82486	131.612	6.5739	1008.57	86664	11
7	2017	7	28.3355	81.1537	117.412	16.8875	2.69703	122.001	7.50294	1008.68	86664	7
7	2017	8	27.9367	82.7927	175.182	19.6463	2.68283	122.24	7.07096	1008.39	86664	13
7	2017	9	27.7077	84.2897	186.676	18.5441	2.31544	113.281	7.5739	1009.38	86664	5
7	2017	10	27.6077	84.9349	130.048	15.0757	2.21658	105.233	7.50294	1009.33	86664	6
7	2017	11	26.4367	90.7162	791.981	23.0838	2.57515	66.5867	8	1008.53	86664	4
7	2017	12	26.1858	88.0062	432.674	15.9345	3.1964	75.6049	7.92904	1010.65	86664	0
7	2018	1	26.1858	88.0772	223.001	17.3032	1.82838	67.6017	7.50294	1009.7	86474	3
7	2018	2	26.8408	80.7993	17.2065	4.05986	3.02963	116.876	4.93493	1011.74	86474	9
7	2018	3	27.8911	80.5151	84.5083	5.22114	2.46099	140.442	5.00589	1010.13	86474	1
7	2018	4	28.1633	82.225	101.107	9.78615	2.26217	122.425	6	1009.19	86474	1
7	2018	5	27.9716	85.5798	177.446	14.7272	1.56452	112.303	7	1008.9	86474	10
7	2018	6	27.8515	84	135.778	16.9393	2.15206	102.424	8	1008.77	86474	13
7	2018	7	28.4154	79.8636	140.939	17.2425	3.64199	130.412	7	1007.98	86474	26
7	2018	8	28.5645	79.3725	109	15.071	3.85504	123.958	7	1008.3	86474	38
7	2018	9	27.3716	83.7217	182.719	20.3109	2.50062	109.239	7	1009.43	86474	33
7	2018	10	27.1858	87.432	291.918	21.7661	1.85088	91.3657	7	1010.64	86474	23
7	2018	11	26.5284	90.0772	165.016	8.58504	2.07155	34.4883	7.49706	1009.75	86474	22
7	2018	12	26.9787	89.0062	555.174	21.142	1.9982	84.0411	7	1010.8	86474	22
8	2002	1	26.1	82	38.9	13	2.7	111.7	7.1	1012.05	107942	0
8	2002	2	26.2	79	0.1	1	2.8	131.9	5.5	1012.98	107942	0
8	2002	3	27.3	79	94.8	8	2.4	174.5	5.2	1010.14	107942	0
8	2002	4	28.3	79	68.6	7	2.1	157.5	6.3	1008.55	107942	15
8	2002	5	28.3	80	102.9	14	1.6	138.3	6.8	1008.03	107942	32
8	2002	6	28.4	78	149.7	13	1.1	128.3	7.4	1007.89	107942	53
8	2002	7	28.6	74	87.5	11	1.6	163.8	6.7	1008.13	107942	40
8	2002	8	27.8	76	175.2	14	1.6	139.5	8.1	1008.57	107942	53
8	2002	9	27.6	79	97.2	11	1.4	134.7	7.6	1009.55	107942	34
8	2002	10	27.2	83	213.3	15	1.4	132.4	7.1	1009.66	107942	24
8	2002	11	26.3	87	810.4	23	1.3	85.9	8	1010.3	107942	19
8	2002	12	26.8	86	807.7	22	2	97.3	7.6	1010.97	107942	3
8	2003	1	26.4	82	239.3	15	1.6	114.8	6.5	1012.52	108109	4
8	2003	2	27.1	79	18.2	8	2.6	133.4	6.1	1011.27	108109	7
8	2003	3	27.7	80	142.2	13	2.4	158.2	6.3	1010.29	108109	7
8	2003	4	28.4	77	36.2	4	1.4	172.9	5.5	1008.88	108109	0
8	2003	5	28.3	80	167	13	1.2	135.5	7.9	1007.79	108109	1
8	2003	6	27.9	80	163.8	13	1.2	143.8	7.1	1008.11	108109	6
8	2003	7	27.6	81	116.3	15	1.2	127.6	8.3	1008.54	108109	3
8	2003	8	28.2	79	66	11	1.6	144.6	7.7	1008.28	108109	2
8	2003	9	27.5	82	175.7	17	1.1	135.7	8.1	1008.98	108109	3
8	2003	10	26.4	87	390	21	0.9	99.1	8.7	1009.72	108109	6
8	2003	11	26.2	87	565.8	17	1.1	101.2	7.6	1010.48	108109	1
8	2003	12	25.4	85	751.1	23	2.1	92	8.2	1012.08	108109	0
8	2004	1	26.5	82	61.3	13	2.3	128.6	6.9	1011.87	106570	0
8	2004	2	26.5	81	180.3	8	2.4	117.5	7.2	1011.63	106570	0
8	2004	3	27.6	80	35.9	6	2.3	150.6	6.6	1010.08	106570	2
8	2004	4	28.6	78	36.3	4	2	159.6	6.8	1009.26	106570	0
8	2004	5	28.5	77	117.1	11	1.9	147.7	7.8	1008.29	106570	1
8	2004	6	28.1	76	93.5	12	1.3	139	7.8	1008.89	106570	0
8	2004	7	27.5	80	102.3	14	1.1	142.6	8.1	1008.45	106570	0
8	2004	8	27.9	78	82.1	13	1.2	140.1	8	1008.53	106570	0
8	2004	9	27	83	177.2	15	1.4	133.7	8	1009.75	106570	0
8	2004	10	26.5	84	258.9	26	1.4	112.6	7.8	1010.96	106570	0
8	2004	11	26.5	86	421.1	25	1.7	110.2	7.5	1010.93	106570	2
8	2004	12	25.9	84	283.8	16	2	108.1	7.3	1011.37	106570	0
8	2005	1	25.9	81	85.7	8	2.5	127.9	5.9	1011.92	106933	11
8	2005	2	26.7	78	0	0	2.7	145.6	4.5	1011.92	106933	2
8	2005	3	27.1	80	241.5	9	2.2	157.7	5	1011.6	106933	0
8	2005	4	28.7	77	12.4	3	2	172.9	5	1010.33	106933	4
8	2005	5	28.5	79	132.2	13	1.2	147.4	7	1007.98	106933	9
8	2005	6	28.4	77	121.2	12	1.1	135.8	7	1007.38	106933	23
8	2005	7	28	77	147.1	14	1.2	135.2	8	1008.57	106933	28
8	2005	8	28.2	76	65.2	14	1.6	147.6	7.8	1008.43	106933	25
8	2005	9	27.8	79	136.5	13	0.9	123.5	8	1008.75	106933	23
8	2005	10	26.5	86	384.4	23	1.1	95.5	8.5	1009.77	106933	18
8	2005	11	26.3	86	643.1	15	1.6	82	8	1009.95	106933	21
8	2005	12	24.9	90	927.9	24	1.7	55.9	9	1010.34	106933	13
8	2006	1	26	84	194.3	14	1.5	102.6	6	1010.75	107286	9
8	2006	2	26.7	83	322.2	14	2.3	111.6	6	1011.18	107286	2
8	2006	3	27.5	80	48.2	9	2	147.3	5	1009.42	107286	0
8	2006	4	27.8	82	96.5	17	1.4	143.9	6	1008.53	107286	0
8	2006	5	27.5	84	177.3	15	0.9	115.6	7	1008.72	107286	2
8	2006	6	27.7	83	297.6	19	1.2	132	8	1008.08	107286	7
8	2006	7	28.1	79	38.9	16	1.1	117.3	8	1008.14	107286	3
8	2006	8	27.7	79	211	17	0.9	139.6	8	1008.23	107286	0
8	2006	9	27.2	83	224.3	20	1	123.9	8	1009.41	107286	5
8	2006	10	26.8	84	340.3	17	0.8	109.7	7	1010.72	107286	3
8	2006	11	26.8	86	417.8	21	1.1	105.9	6	1010.1	107286	7
8	2006	12	26.2	84	422.5	22	2.5	99.8	7	1011.08	107286	4
8	2007	1	25.9	84	211.4	17	2.1	92.6	7	1012.49	107537	6
8	2007	2	26.2	80	5.7	4	2.1	131.7	4	1011.78	107537	3
8	2007	3	27.5	79	133.6	7	2	155.4	5	1009.98	107537	2
8	2007	4	28.3	81	173.4	12	2	151	5	1009.66	107537	7
8	2007	5	27.7	84	261.9	25	1.2	121.7	7	1008.54	107537	23
8	2007	6	28.3	81	188	13	1.1	127.6	7	1007.11	107537	24
8	2007	7	27.9	79	126.8	21	1.3	124.8	8	1008.37	107537	21
8	2007	8	28.1	76	104.2	13	1.8	143.6	7	1008.02	107537	3
8	2007	9	27.7	80	160.2	18	1.4	123.6	7	1008.36	107537	4
8	2007	10	26.4	86	316	23	1.4	96.9	8	1009.21	107537	5
8	2007	11	25.8	85	619.5	20	1.4	93.5	7	1010.1	107537	12
8	2007	12	26	83	297.9	16	1.8	109.3	6	1010.29	107537	3
8	2008	1	26	85	455.8	13	1.3	107.3	6	1010.97	108006	20
8	2008	2	26.4	80	88.5	9	2	117.7	6	1011.42	108006	16
8	2008	3	27.2	81	97.5	10	1.8	142.4	5	1009.84	108006	15
8	2008	4	27.7	81	171.7	9	1.2	136.4	6	1008.36	108006	19
8	2008	5	27.8	82	180.1	21	0.8	126	7	1008.12	108006	38
8	2008	6	27.9	80	50.7	15	1	117.5	7	1008.48	108006	47
8	2008	7	28	79	89.8	13	0.9	132.1	7	1008.34	108006	46
8	2008	8	27.8	79	176.8	16	0.8	138.1	6	1008.38	108006	62
8	2008	9	27.6	80	140.6	12	0.9	108	7	1008.91	108006	43
8	2008	10	27.2	84	287.2	21	0.9	117.6	7	1009.5	108006	44
8	2008	11	25.8	89	1207.6	23	1.4	94	8	1009.53	108006	27
8	2008	12	25.5	86	305.1	16	1.8	87.9	7	1010.89	108006	30
8	2009	1	25.3	82	217.6	10	1.9	102.4	6	1012.26	108170	13
8	2009	2	26.8	78	13.7	1	1.5	120.2	5	1009.92	108170	12
8	2009	3	27.4	81	104	13	1.6	136	6	1009.62	108170	6
8	2009	4	27.9	82	319.2	12	1.1	116.6	6	1008.49	108170	14
8	2009	5	27.9	83	227.9	22	0.8	119	7	1007.31	108170	17
8	2009	6	29.2	74	22.3	9	1.2	145.7	6	1007.88	108170	0
8	2009	7	28.3	78	117.6	16	0.9	136.5	7	1008.12	108170	2
8	2009	8	28	78	151.1	18	0.8	132.5	7	1007.94	108170	9
8	2009	9	27.9	79	172.1	16	1.1	126.5	7	1008.48	108170	10
8	2009	10	27.2	83	96.2	17	0.9	106.3	7	1009.43	108170	8
8	2009	11	26.9	83	486.8	14	1.8	94.4	7	1009.71	108170	12
8	2009	12	26.2	85	247	14	1.3	99.9	6	1011.35	108170	5
8	2010	1	26.6	83	175.4	13	1.5	119	6	1011.95	108834	10
8	2010	2	27.2	79	7.1	4	1.7	127.7	4	1011.29	108834	5
8	2010	3	27.9	78	79.4	6	1.8	147.8	5	1010.79	108834	19
8	2010	4	29	78	22.1	7	1.4	145.2	5	1009.59	108834	12
8	2010	5	29.7	77	123.2	12	1.3	150.2	6	1007.2	108834	28
8	2010	6	28.6	79	175.4	14	0.9	123.4	7	1008.05	108834	56
8	2010	7	27.9	80	132	14	0.7	109.5	7	1008.03	108834	65
8	2010	8	28	80	128.9	15	1	120.6	7	1008.12	108834	123
8	2010	9	27.5	83	109.2	22	1.2	113.5	7	1008.51	108834	75
8	2010	10	27.1	84	272.2	19	1.2	102.1	8	1007.97	108834	55
8	2010	11	25.7	90	1043.3	28	1	73.3	8	1008.88	108834	31
8	2010	12	25.8	87	479.7	20	0.8	78.9	7	1008.61	108834	21
8	2011	1	25.3	87	571.4	23	1.3	83	8	1010.23	109418	22
8	2011	2	26.7	80	32.8	3	1.9	104.2	6	1010.15	109418	15
8	2011	3	26.4	85	1543.7	19	2.6	87.3	7	1009.19	109418	7
8	2011	4	27.7	81	87.9	7	1.6	127.4	6	1009.41	109418	18
8	2011	5	28.3	81	184.9	17	1.3	134.4	7	1008.27	109418	22
8	2011	6	28.4	79	128.7	14	1.2	116.9	7	1007.53	109418	12
8	2011	7	27.9	80	86.6	13	1.3	105.6	7	1007.78	109418	5
8	2011	8	27.6	80	194.1	19	1.3	120.8	8	1008.4	109418	1
8	2011	9	27.5	81	104	16	1.2	101.2	8	1008.81	109418	13
8	2011	10	26.8	86	370.9	21	1.1	97.2	7	1009.13	109418	13
8	2011	11	26.5	86	491.7	22	1.8	98	7	1009.32	109418	11
8	2011	12	25.6	86	404.9	22	2.1	85	8	1010.34	109418	3
8	2012	1	25.9	86	1067.1	19	1.9	83.3	7	1010.35	110327	8
8	2012	2	27.1	81	8.6	5	2.2	112.1	5	1009.44	110327	4
8	2012	3	27.7	80	143.7	15	1.8	135.3	6	1009.29	110327	8
8	2012	4	28.2	80	52.3	11	1.9	119.2	7	1009.05	110327	5
8	2012	5	28.8	76	39.9	12	1.7	130.4	7	1007.25	110327	7
8	2012	6	28.8	73	56.9	8	1.9	134.9	7	1007.64	110327	8
8	2012	7	28.6	74	56	7	2	129.5	7	1007.67	110327	9
8	2012	8	28.5	76	141.1	9	1.9	147.1	7	1008.59	110327	35
8	2012	9	27.4	82	133.5	20	1.4	100.5	8	1009.12	110327	54
8	2012	10	26.8	86	245.5	20	1.5	96.4	7	1009.84	110327	58
8	2012	11	26.8	88	370	22	1.4	79.1	7	1009.64	110327	83
8	2012	12	26.7	87	456.9	17	1.7	91.5	7	1009.84	110327	33
8	2013	1	26.5	85	84.7	11	1.9	91.6	7	1011.75	111295	23
8	2013	2	26.6	84	160.8	11	2.1	99.6	7	1010.71	111295	12
8	2013	3	27.9	81	5.1	3	1.7	139.5	5	1010.53	111295	4
8	2013	4	28.4	82	290	10	1.2	122	6	1008.39	111295	16
8	2013	5	28.2	84	276.5	16	1.1	124.4	7	1008.03	111295	17
8	2013	6	28.4	81	73.4	13	1.1	100.7	7	1006.8	111295	32
8	2013	7	27.4	82	125.2	17	0.9	97.9	8	1007.67	111295	21
8	2013	8	27.6	81	125.1	14	1.1	126.8	7	1008.18	111295	8
8	2013	9	27.7	80	88.5	13	1.2	109	7	1008.46	111295	8
8	2013	10	26.7	86	218.2	24	1	92.4	7	1010.07	111295	11
8	2013	11	26.5	88	1050.9	21	1.5	84.1	7	1009.22	111295	9
8	2013	12	25.8	86	342.2	15	1.6	83.8	7	1010.64	111295	3
8	2014	1	25.5	83	267.5	12	2	100.1	7	1012.85	111879	11
8	2014	2	25.7	79	1.6	2	2.2	111.3	4	1011.08	111879	5
8	2014	3	27.2	78	0	0	2.2	155.8	4	1011.2	111879	2
8	2014	4	29	76	0.3	1	1.9	160.8	5	1009.37	111879	6
8	2014	5	28.8	80	202.2	13	1.3	141.8	6	1008.45	111879	9
8	2014	6	28.7	78	93.7	12	1.9	104.1	7	1006.89	111879	21
8	2014	7	28.6	77	75.3	16	1.5	122.2	7	1007.94	111879	50
8	2014	8	27.8	80	159.1	17	1.4	129.7	7	1009.02	111879	53
8	2014	9	27.3	83	123.3	21	1.3	98	7	1009.41	111879	63
8	2014	10	26.8	87	337.6	24	1.3	94.7	7	1010.04	111879	44
8	2014	11	26.7	89	418.6	22	1.3	69.9	7	1010.11	111879	42
8	2014	12	26.4	87	639.2	24	2.1	76.5	7	1010.77	111879	23
8	2015	1	26	84	69.5	12	1.7	96	6	1012.66	112565	12
8	2015	2	25.8	80	18.3	2	2	108.2	4	1012.49	112565	11
8	2015	3	27.7	79	0.2	1	2.1	145.6	4	1011.86	112565	9
8	2015	4	28.5	80	112.6	7	1.6	146.2	5	1010.02	112565	9
8	2015	5	28.8	79	65.1	11	1.3	144.6	6	1009.16	112565	7
8	2015	6	28.3	81	63	12	1.1	109.5	7	1008.59	112565	14
8	2015	7	28.3	78	96.3	14	1.4	116.2	7	1008.75	112565	19
8	2015	8	27.5	83	214.3	16	1.1	101.1	7	1009.29	112565	17
8	2015	9	27.4	84	145.3	19	0.9	101.6	7	1009.79	112565	26
8	2015	10	27.1	87	326.8	19	0.8	94.1	7	1011.1	112565	18
8	2015	11	26.5	91	579.9	25	1	67.7	7	1010.37	112565	15
8	2015	12	26.6	88	399.7	20	1.6	93.9	6	1012.15	112565	6
8	2016	1	27.1	85	114.7	12	1.8	99.7	5	1012.32	113067	15
8	2016	2	26.7	83	118.3	10	2.6	101.3	6	1012.86	113067	3
8	2016	3	27.9	80	0	0	2.2	143.6	4	1011.75	113067	7
8	2016	4	29.8	77	0	3	1.8	166.6	4	1009.3	113067	0
8	2016	5	29.5	80	44.4	12	1.7	141.7	6	1008.28	113067	1
8	2016	6	28.5	81	114.7	14	1.3	118.3	7	1008.86	113067	0
8	2016	7	27.7	84	140.4	18	1.3	112.8	7	1008.47	113067	7
8	2016	8	28.4	80	37.6	17	1.4	114	7	1007.54	113067	16
8	2016	9	28	81	116.1	19	1.4	124.2	7	1008.59	113067	18
8	2016	10	27.3	86	272.3	23	1.3	96.9	7	1008.49	113067	10
8	2016	11	27.1	90	379.5	24	1.3	95	7	1009.78	113067	19
8	2016	12	25.9	90	1110.9	23	1.7	57.4	7	1010.17	113067	15
8	2017	1	25.6	91	1772.7	26	1.9	64.7	8	1010.49	113397	15
8	2017	2	26.4	84	115.3	11	1.9	95.7	6	1011.95	113397	10
8	2017	3	27.5	82	74.6	7	1.7	125.3	5	1010.43	113397	7
8	2017	4	27.6	85	170.6	11	1.5	108	6	1009.7	113397	10
8	2017	5	28.6	82	81.1	14	1.4	112.7	6	1008.11	113397	18
8	2017	6	28.6	80	129.6	12	0.8	133.3	6	1008.53	113397	11
8	2017	7	28.2	81	91.6	15	1	107.3	7	1008.52	113397	7
8	2017	8	28.1	82	150.5	19	1.1	125.9	7	1008.18	113397	9
8	2017	9	27.7	85	126.5	17	1.1	110.5	7	1008.92	113397	11
8	2017	10	27.7	85	123.3	15	1	113.2	6	1009.02	113397	13
8	2017	11	26.6	89	1035	23	1.8	72.8	7	1008.57	113397	10
8	2017	12	25.9	88	607.5	17	1.8	75.4	7	1010.82	113397	7
8	2018	1	26.1	88	226.6	17	1.4	98.1	7	1009.74	116307	11
8	2018	2	26.6	81	12.4	4	2.1	114.3	4	1011.79	116307	2
8	2018	3	27.8	80	114.7	4	2.1	144.5	4	1010.1	116307	6
8	2018	4	28	82	59.1	9	1.7	127.3	5	1009.23	116307	7
8	2018	5	27.9	84	109.5	11	1.1	108.5	6	1008.87	116307	8
8	2018	6	28	81	110	15	1.4	112.4	7	1008.5	116307	18
8	2018	7	28.5	77	90.7	15	1.5	119.3	6	1007.57	116307	32
8	2018	8	28.3	79	48.2	13	1.5	112.8	7	1008.03	116307	29
8	2018	9	27.4	83	191.2	20	1.3	111.2	6	1009.28	116307	28
8	2018	10	27.1	87	335.1	21	1.3	98.5	6	1010.62	116307	40
8	2018	11	26.6	89	217.1	9	1.5	31.4	7	1009.96	116307	43
8	2018	12	26.7	89	704.2	22	1.6	88.7	7	1010.87	116307	32
9	2002	1	25.7747	80.8211	5.51287	5.92226	1.19643	112.656	5.78626	1013.04	149761	8
9	2002	2	26.9513	78.5575	1.95562	1.04297	1.40085	134.598	5.61099	1013.57	149761	4
9	2002	3	27.5237	76.2412	45.0243	7.06873	0.967314	160.635	4.8491	1010.79	149761	12
9	2002	4	27.3306	80.4728	106.915	12.2582	0.813214	137.63	5.12834	1009.94	149761	18
9	2002	5	27.2141	83.3743	151.93	13.1403	0.609153	119.519	6.89369	1009.43	149761	18
9	2002	6	27.535	84.3337	118.455	17.3556	0.552371	101.546	6.99827	1008.19	149761	85
9	2002	7	27.2703	85.8238	156.367	20.6424	0.578381	123.59	6.94235	1009.18	149761	135
9	2002	8	26.9765	84.4495	219.192	22.6968	0.650641	105.231	7.16136	1009.14	149761	23
9	2002	9	26.9867	85.6552	314.393	21.4877	0.355567	98.4661	7.08314	1009.94	149761	14
9	2002	10	27.0942	86.6958	252.074	20.2152	0.41849	120.562	6.95134	1010.26	149761	4
9	2002	11	26.2692	85.9421	293.745	19.4755	0.382792	106.527	7.89283	1009.98	149761	5
9	2002	12	26.0837	83.9914	202.501	14.1342	0.608803	105.093	7.2491	1012.68	149761	2
9	2003	1	26.9182	82.0934	35.0175	10.5442	1.05513	101.914	5.92542	1010.36	150335	17
9	2003	2	27.5339	77.1919	9.28622	1.8965	1.48469	103.22	3.45937	1011.09	150335	9
9	2003	3	28.2397	75.8755	45.3884	7.74182	1.34623	107.61	4.40924	1010.26	150335	8
9	2003	4	28.8124	74.9914	30.3524	8.34123	1.15765	166.204	4.06455	1009.15	150335	8
9	2003	5	27.4564	85.2757	242.759	17.4272	0.673805	135.644	7.97226	1008.65	150335	3
9	2003	6	27.4782	83.5886	126.691	14.6907	0.736727	112.273	5.98055	1008.98	150335	17
9	2003	7	26.8086	85.5394	164.866	19.3699	0.894724	110.856	7.76171	1009.63	150335	39
9	2003	8	27.1863	84.7044	174.281	15.4128	0.819355	110.119	6.98228	1009.44	150335	34
9	2003	9	26.8452	86.6465	249.295	24.0061	0.615293	112.918	8.19369	1010.05	150335	6
9	2003	10	26.1362	88.7943	227.769	26.3155	0.584007	79.2669	8.58349	1010.26	150335	5
9	2003	11	26.5281	85.0985	175.696	14.3494	0.721084	92.4387	6.38409	1010.4	150335	16
9	2003	12	25.613	83.5134	305.576	9.73281	1.07976	88.655	6.47657	1011.68	150335	1
9	2004	1	26.3863	79.2412	16.9708	6.8965	0.879411	110.031	4.20302	1011.28	145301	7
9	2004	2	26.966	76.7684	24.3119	6.2234	1.10526	121.821	5.22074	1011.11	145301	5
9	2004	3	28.1397	76.9334	86.239	7.70498	1.02393	147.178	5.57286	1009.91	145301	2
9	2004	4	28.3684	78.8436	60.2178	7.4959	0.849776	137.404	6.07952	1009.36	145301	9
9	2004	5	27.5506	84.1772	105.486	18.0061	0.982792	117.582	7.23889	1008.91	145301	13
9	2004	6	26.8855	84.771	100.017	16.3699	0.963953	102.897	7.5777	1009.8	145301	31
9	2004	7	26.4649	85.9188	302.164	19.2009	0.500165	100.159	8.14287	1009.22	145301	24
9	2004	8	26.8341	86.3423	167.439	22.671	0.748824	104.881	7.96647	1009.44	145301	21
9	2004	9	26.8206	85.1158	124.764	15.0286	0.577866	109.421	7.95713	1010.21	145301	13
9	2004	10	26.6379	84.9507	129.133	20.6129	0.715808	97.347	7.78652	1011.13	145301	10
9	2004	11	26.9446	83.777	117.433	17.1199	0.922114	92.0543	6.85178	1010.8	145301	28
9	2004	12	26.1759	80.8263	48.5348	6.22871	1.12842	102.036	5.98764	1011.1	145301	44
9	2005	1	26.4933	75.8176	21.778	4.43248	1.21597	126.806	4.95584	1011.47	146226	48
9	2005	2	27.7686	71.0233	0.337015	0.0286472	1.28875	149.682	3.42999	1011.61	146226	36
9	2005	3	28.0521	73.9741	66.3201	6.27781	1.14899	157.449	4.78566	1011.2	146226	35
9	2005	4	29.4927	72.4606	10.3193	6.58184	1.03059	164.578	4.80847	1010.22	146226	52
9	2005	5	28.0461	82.0666	190.596	19.1322	0.747445	117.729	7	1008.65	146226	134
9	2005	6	27.5872	84.7131	259.645	18.9632	0.763953	103.078	6.89283	1008.29	146226	243
9	2005	7	27.451	83.7623	116.593	16.579	0.790313	111.357	7.58755	1009.45	146226	371
9	2005	8	27.5559	82.8695	234.477	19.2295	0.852886	117.795	7.69283	1009.3	146226	258
9	2005	9	27.3568	83.8609	140.473	16.5532	0.57467	95.9275	7.04926	1009.6	146226	149
9	2005	10	26.4049	88.0086	281.461	24.748	0.457297	91.9484	8.47857	1010.26	146226	94
9	2005	11	26.3107	87.9015	359.568	18.5389	0.587718	78.3111	8	1010.22	146226	46
9	2005	12	25.2174	88.9421	393.719	21.3351	0.721249	72.5327	7.94209	1010.26	146226	19
9	2006	1	26.4476	81.2061	87.0668	11.3351	0.669321	101.265	5.86454	1010.84	147562	20
9	2006	2	27.0405	79.3436	156.73	12.2377	0.918717	134.685	5.06871	1011.08	147562	6
9	2006	3	28.0454	76.6145	32.7445	6.3351	0.769419	137.36	4.93227	1009.54	147562	1
9	2006	4	27.9068	81.3406	157.498	15.252	0.419925	123.026	5.79583	1009.05	147562	1
9	2006	5	27.0613	85.9313	208.196	21.1751	0.529176	105.289	7	1009.44	147562	1
9	2006	6	27.3137	84.999	296.325	18.0114	0.544904	120.572	7	1009.02	147562	7
9	2006	7	27.0499	85.1126	194.042	22.9775	0.772094	88.6731	7.86356	1009.38	147562	6
9	2006	8	27.0635	83.9772	234.499	18.7909	0.776291	120.037	7	1009.33	147562	5
9	2006	9	26.9613	84.7948	285.716	20.0286	0.642623	116.395	7	1010.25	147562	2
9	2006	10	26.5953	86.5917	153.232	21.3269	0.503775	99.3119	6.93227	1011.33	147562	0
9	2006	11	26.8021	85.0687	123.494	20.0831	0.45607	85.2767	6.13644	1010.28	147562	0
9	2006	12	26.5612	81.478	65.4765	13.1457	1.15119	91.8999	6.06871	1010.99	147562	6
9	2007	1	26.1747	80.6155	42.2722	9.96523	0.97808	92.6149	6.00098	1012.23	148585	8
9	2007	2	26.9338	73.6832	22.1947	2.26637	0.912042	127.648	4.79681	1011.34	148585	4
9	2007	3	27.7407	75.4093	125.812	10.4959	0.662843	154.262	5.7281	1009.95	148585	15
9	2007	4	28.1341	80.3406	117.571	13.7193	0.608562	126.198	5.79583	1009.67	148585	15
9	2007	5	27.5408	85.0677	288.655	19.6702	0.50866	103.555	7	1009.06	148585	18
9	2007	6	27.7342	84.9313	161.443	19.1465	0.615728	103.579	7	1007.78	148585	37
9	2007	7	26.9362	86.2501	229.695	23.579	0.724585	92.4538	7.79583	1009.06	148585	39
9	2007	8	27.0363	84.2491	208.512	19.1322	0.958745	108.81	7.79583	1008.98	148585	16
9	2007	9	27.0227	85.3855	283.592	20.6506	0.690426	99.3044	6.86356	1009.14	148585	11
9	2007	10	25.9954	89.5907	316.058	29.1894	0.536047	80.14	7.86356	1009.71	148585	17
9	2007	11	25.9089	86.6604	223.242	15.6158	0.53585	83.1928	6.93227	1010.09	148585	15
9	2007	12	26.2816	82.1374	104.846	11.5442	1.00338	91.6704	5.93227	1010.05	148585	12
9	2008	1	26.4406	82.1384	69.4196	8.63012	0.610056	93.3571	5.06871	1010.64	150122	14
9	2008	2	26.4543	78.0707	48.203	4.65877	0.937344	110.818	5.86454	1011.12	150122	14
9	2008	3	27.2406	79.2061	68.6253	11.7193	0.862548	127.201	4.93227	1009.59	150122	15
9	2008	4	27.4022	81.9313	119.312	14.3011	0.492735	106.936	5.86356	1008.48	150122	8
9	2008	5	27.0362	85.523	257.161	21.8167	0.642623	111.415	7	1008.91	150122	29
9	2008	6	27.0295	85.4542	185.468	20.3011	0.690525	93.6183	7	1009.11	150122	30
9	2008	7	27.1682	84.5907	139.248	18.3441	0.751775	101.602	7	1008.95	150122	17
9	2008	8	27.375	82.8636	136.955	18.493	0.597199	117.355	6.13644	1008.84	150122	20
9	2008	9	26.7227	85.5907	195.11	19.0777	0.817813	91.9044	7	1009.73	150122	28
9	2008	10	26.9409	87	120.096	21.8453	0.422403	97.1597	7	1009.85	150122	31
9	2008	11	26.0658	88.478	386.685	18.6015	0.669616	70.0086	8	1009.43	150122	26
9	2008	12	25.6406	84.5467	67.4895	12.3895	0.832558	76.5439	6.93227	1010.67	150122	19
9	2009	1	25.361	80.3436	43.7506	4.7275	1.19361	97.9906	5.06871	1012.07	151563	28
9	2009	2	27.3316	76.5477	13.2613	2.7766	0.83067	114.798	4.86454	1009.94	151563	17
9	2009	3	27.4864	80.8177	164.226	16.4816	0.61563	123.665	6	1009.89	151563	11
9	2009	4	27.5817	83.477	116.603	15.5532	0.481372	112.562	6.13644	1009.13	151563	13
9	2009	5	27.4226	85.2042	189.383	20.1518	0.554478	92.8756	7	1008.15	151563	13
9	2009	6	27.9976	81.523	80.4596	10.8339	1.02468	113.903	5.79583	1008.95	151563	2
9	2009	7	27.4226	83.7958	156.019	15.169	0.931457	103.811	7	1009.21	151563	5
9	2009	8	27.35	84.4542	309.434	21.4243	0.879063	112.331	7	1008.94	151563	6
9	2009	9	26.9772	85.3865	206.466	19.4529	0.910843	102.074	7	1009.66	151563	6
9	2009	10	26.7818	86	180.077	20.4529	0.742721	103.772	7	1009.86	151563	5
9	2009	11	26.5818	85.4093	199.073	13.0544	0.819897	92.3874	6.20417	1009.71	151563	9
9	2009	12	26.3746	81.4123	40.2219	8.69885	0.866422	99.7021	5.00098	1011.19	151563	2
9	2010	1	26.7405	79.8206	30.5554	6.88217	0.925785	106.195	5.06871	1011.68	152808	9
9	2010	2	27.7587	74.2289	47.8129	3.08305	1.13715	134.871	4.06871	1011.04	152808	7
9	2010	3	28.4654	74.8883	60.6683	6.05729	0.81045	156.565	4.93227	1010.64	152808	20
9	2010	4	28.9271	77.6822	78.8569	8.66201	0.708562	155.435	5	1009.64	152808	21
9	2010	5	29.0749	81	117.816	12.9456	0.529176	128.195	5.93227	1007.68	152808	11
9	2010	6	27.4908	84.6584	188.552	19.2152	0.563237	104.409	7	1008.98	152808	43
9	2010	7	26.9635	85.6584	208.041	20.1751	0.524585	98.8511	7.06773	1008.86	152808	294
9	2010	8	27.2634	84.523	152.42	17.6649	0.676979	102.762	7	1008.89	152808	135
9	2010	9	27.1273	86.0677	248.532	26.3269	0.301888	108.216	7	1009.04	152808	162
9	2010	10	26.6361	86.7281	289.086	22.5532	0.476782	90.425	7	1008.69	152808	57
9	2010	11	25.9339	89.478	433.127	25.3494	0.351382	60.7237	8	1009.16	152808	20
9	2010	12	25.9205	87.5458	255.364	17.3494	0.435654	72.4431	7	1008.73	152808	11
9	2011	1	25.6542	85.2758	243.077	20.3494	0.712141	82.0484	6.93227	1010.09	154042	8
9	2011	2	27.1589	77.8883	52.8267	6.51022	0.796707	105.752	5.00098	1010.01	154042	7
9	2011	3	26.4339	85.5467	635.882	18.1117	0.671897	77.9489	6.20417	1009.18	154042	7
9	2011	4	27.6817	81.9333	105.768	11.4128	0.576586	102.727	5.7281	1009.48	154042	3
9	2011	5	27.809	84	160.475	17.9026	0.604169	116.55	6.13644	1009.02	154042	11
9	2011	6	27.5634	85.4552	108.235	18.3699	0.792806	86.153	7	1008.47	154042	10
9	2011	7	26.9567	85.6594	182.7	16.5389	0.754253	91.2907	7.13644	1008.71	154042	9
9	2011	8	26.9819	84.8636	229.952	19.0143	0.651972	108.412	7.13644	1009.31	154042	18
9	2011	9	26.6567	86.6594	226.957	16.8597	0.733738	91.8051	7.13644	1009.8	154042	13
9	2011	10	26.6544	87.1374	144.018	20.1403	0.572192	82.8412	7.13644	1009.61	154042	2
9	2011	11	26.634	87.002	225.898	17.5155	0.680951	86.1377	7.06871	1009.47	154042	4
9	2011	12	26.0271	86.2071	198.044	15.8106	1.04888	72.1282	6.27288	1010.26	154042	4
9	2012	1	26.2931	84.4103	268.199	13.6989	0.931358	76.8292	6.27288	1010.3	155786	9
9	2012	2	27.3862	78.6155	25.8487	7.6076	0.712731	114.846	5.00098	1009.25	155786	5
9	2012	3	27.6001	80.4093	85.326	12.2921	0.642918	123.346	6.06871	1009.5	155786	6
9	2012	4	27.6478	83.3406	163.977	16.3011	0.542918	102.211	6.13644	1009.5	155786	12
9	2012	5	27.4839	85.3865	245.04	17.3584	0.654155	93.733	6.13644	1008.37	155786	12
9	2012	6	27.5635	82.4552	152.448	10.6792	0.895283	97.332	6.06871	1008.69	155786	17
9	2012	7	27.3433	84.3178	213.491	14.966	0.708829	94.1798	7	1008.65	155786	24
9	2012	8	27.5501	82.5907	216.94	13.3842	0.781541	104.513	6.13644	1009.57	155786	52
9	2012	9	26.584	86.7271	220.492	24.3699	0.561124	80.253	7.13644	1010.14	155786	65
9	2012	10	26.7544	86.2739	212.163	18.1661	0.365518	91.2043	6.13644	1010.35	155786	22
9	2012	11	26.9999	87.4103	146.992	16.6989	0.297396	75.1471	6.27288	1009.89	155786	31
9	2012	12	26.6272	86.2061	175.256	13.4755	0.540215	74.4401	6.27288	1009.92	155786	22
9	2013	1	26.827	82.2758	42.1647	8.32078	0.799087	97.159	6.06871	1011.55	156991	59
9	2013	2	26.9269	80.4123	80.0322	8.3351	0.88733	96.6569	6.27288	1010.62	156991	45
9	2013	3	28.5384	77.6164	18.6752	3.01432	0.599087	147.314	4.27288	1010.54	156991	50
9	2013	4	28.3272	81.3416	142.252	12.6362	0.483653	111.683	6.20417	1008.94	156991	69
9	2013	5	28.0089	84.0687	243.287	18.5933	0.404169	106.865	6.34061	1008.8	156991	161
9	2013	6	27.5702	84.5917	211.197	18.3441	1.17477	89.8293	7.20417	1007.73	156991	228
9	2013	7	26.7634	86.3875	202.955	17.8883	1.03393	79.0338	7.20417	1008.61	156991	31
9	2013	8	26.9771	84.4552	188.3	18.3126	1.20883	105.416	6.20417	1009.13	156991	33
9	2013	9	27.0362	85.4552	157.409	17.3842	1.368	88.6513	7.20417	1009.4	156991	0
9	2013	10	26.4681	87.1364	151.921	22.252	0.824782	89.1581	7.13644	1010.6	156991	3
9	2013	11	26.6476	86.3416	363.808	17.4325	0.833639	81.5316	6.34061	1009.31	156991	0
9	2013	12	25.9748	84.0697	134.606	8.79623	1.34207	91.8283	6.27288	1010.48	156991	1
9	2014	1	25.661	78.6164	48.712	5.85353	1.35526	104.565	5.34159	1012.52	159174	24
9	2014	2	26.6384	71.5018	0.183019	0.252049	1.35806	142.933	3.40932	1010.72	159174	4
9	2014	3	27.7792	72.1612	17.3162	2.65057	1.85568	169.071	3.27288	1010.87	159174	8
9	2014	4	28.075	81.2042	175.465	12.4046	1.09531	129.076	6.13644	1009.75	159174	3
9	2014	5	27.8226	84.7281	184.603	18.2152	0.849789	109.812	6.20417	1009.12	159174	7
9	2014	6	27.7179	85.1833	158.976	15.5245	1.30215	91.9572	6.34061	1007.89	159174	20
9	2014	7	27.3724	84.8427	213.594	23.0204	1.3384	97.3233	7.13644	1009.05	159174	27
9	2014	8	26.9772	85.6594	319.859	22.2152	0.961124	90.8315	7.13644	1009.82	159174	7
9	2014	9	26.9885	85.8645	184.444	19.1375	0.926866	91.7743	7.13644	1010.17	159174	23
9	2014	10	26.5749	88.001	226.471	21.3208	0.917911	89.1331	7.20417	1010.39	159174	9
9	2014	11	26.6273	88.3416	241.04	19.3638	0.73126	76.666	7.13644	1010.17	159174	0
9	2014	12	26.3476	87.2061	238.525	19.5728	1.22866	78.3799	6.34061	1010.63	159174	0
9	2015	1	26.1543	80.5487	21.4586	4.97955	1.46024	103.161	4.40932	1012.3	159924	3
9	2015	2	26.2064	75.8903	4.08292	1.98568	1.52797	118.712	3.40932	1012.02	159924	8
9	2015	3	28.1519	73.8216	4.28904	1.01432	1.39899	155.082	3.47705	1011.53	159924	13
9	2015	4	28.5339	78.479	64.1733	9.62193	1.09033	125.811	5.34061	1009.9	159924	6
9	2015	5	28.2818	82.9323	121.301	20.6853	0.91104	131.297	6.13644	1009.71	159924	6
9	2015	6	27.7818	84.7958	154.035	13.6907	0.972389	89.6928	6.34061	1009.32	159924	25
9	2015	7	27.3704	86.1823	245.647	21.8515	1.29069	115.23	7	1009.62	159924	34
9	2015	8	27.009	86.7281	298.8	22.9488	0.979358	108.392	7.13644	1010.06	159924	24
9	2015	9	27.009	86.8645	266.311	20.662	0.899677	104.074	7.13644	1010.53	159924	23
9	2015	10	27.2068	87.1374	238.123	20.8482	0.731457	98.999	7.20417	1011.43	159924	17
9	2015	11	26.5544	89.1384	330.084	25	0.653663	78.4702	7.13644	1010.43	159924	32
9	2015	12	26.7882	85.0717	129.21	14.6989	1.06034	96.222	5.27288	1011.97	159924	21
9	2016	1	27.4473	81.3445	43.4367	7.54418	1.27359	108.888	5.06871	1011.99	160724	27
9	2016	2	27.1404	77.0258	35.5061	5.57283	2.18694	118.754	4.40932	1012.41	160724	25
9	2016	3	28.8906	73.0258	0	0	1.36473	162.939	3.27288	1011.43	160724	15
9	2016	4	30.5703	71.1602	9.64237	2.98568	1.21781	159.582	3.40834	1009.34	160724	8
9	2016	5	28.8681	81.1364	189.355	16.3269	0.933738	128.411	6.20417	1008.86	160724	7
9	2016	6	27.7954	82.8636	174.646	14.9026	0.892904	105.861	6.34061	1009.68	160724	9
9	2016	7	27.375	86	542.695	18.788	0.851972	87.6145	7.13644	1009.22	160724	36
9	2016	8	27.2248	86.3188	235.505	23.9632	1.32466	104.334	7.06773	1008.7	160724	48
9	2016	9	26.8588	86.1146	241.855	23.241	1.33133	106.403	7.20417	1009.68	160724	44
9	2016	10	26.7361	87.8645	323.259	25.5073	1.1156	87.5973	8	1009.26	160724	25
9	2016	11	27.0476	86.6145	138.576	15.1743	0.847087	80.7218	6.34061	1009.79	160724	30
9	2016	12	26.1612	87.4103	456.25	15.9796	1.0902	71.5038	6.40834	1010.07	160724	11
9	2017	1	25.9474	87.6155	617.49	21.5585	0.962618	62.8362	7.13644	1010.36	161356	7
9	2017	2	26.9133	79.7529	34.8054	10.0974	1.43315	96.5449	5.27288	1011.61	161356	8
9	2017	3	27.7726	78.6832	120.962	9.65057	1.03354	126.435	5.13644	1010.28	161356	15
9	2017	4	27.3887	85.3406	205.696	18.0061	0.952169	109.756	6.06773	1009.89	161356	16
9	2017	5	27.8432	85.8636	170.443	21.9517	1.04768	92.9383	6.40834	1008.78	161356	29
9	2017	6	27.7773	84.3865	198.919	17.2725	1.22925	109.119	6.20417	1009.27	161356	39
9	2017	7	27.4974	85.252	150.085	19.4128	1.14966	104.192	6.34061	1009.45	161356	37
9	2017	8	27.4295	85.6594	238.978	21.5646	1.2157	101.048	6.2719	1009.01	161356	16
9	2017	9	27.2751	85.9313	265.873	22.1722	1.05227	102.869	7.20417	1009.64	161356	12
9	2017	10	27.5341	85.001	159.057	15.831	1.00665	108.674	6.34061	1009.46	161356	29
9	2017	11	26.5272	88.3416	452.653	23.0143	0.783724	72.7169	7.20417	1008.6	161356	35
9	2017	12	26.0679	84.479	201.073	14.3638	1.44468	74.3382	5.54478	1010.55	161356	17
9	2018	1	26.1475	86.9342	210.196	17.8555	0.872094	72.5596	6.34061	1009.63	161685	0
9	2018	2	26.8996	77.3445	24.756	3.99589	1.41244	111.808	4.20515	1011.31	161685	3
9	2018	3	28.0724	76.6842	49.0862	6.65568	1.15158	131.363	3.47705	1009.94	161685	3
9	2018	4	28.193	78.7509	143.339	10.7657	1.12449	126.687	5.20417	1009.11	161685	2
9	2018	5	27.575	85.2729	288.322	19.8056	0.770304	105.241	6.20417	1009.19	161685	9
9	2018	6	27.3499	85.5917	179.441	20.2421	1.09968	91.2184	7.20417	1009.26	161685	5
9	2018	7	27.2725	85.1146	217.658	21.0977	1.44048	103.946	7	1008.63	161685	5
9	2018	8	27.3724	85.1156	208.377	18.2599	1.44048	96.0417	7	1008.87	161685	19
9	2018	9	26.975	85.7958	198.668	22.5073	0.954155	99.1455	6.20417	1009.89	161685	5
9	2018	10	27.0273	86.2729	244.933	23.6066	0.865518	90.8232	7	1010.77	161685	8
9	2018	11	26.6863	86.5467	57.8398	7.25234	0.721686	30.1564	6.2719	1009.64	161685	16
9	2018	12	26.7816	86.2748	314.452	20.2292	0.90586	80.6687	6.20417	1010.7	161685	9
10	2002	1	25.6	82	2.4	5	0.6	106.1	6	1013.38	29998	7
10	2002	2	26.9	80	1.8	1	0.9	129	6	1013.84	29998	3
10	2002	3	27.4	77	44.1	7	0.6	157.2	5	1011.01	29998	6
10	2002	4	27.1	81	111.2	13	0.6	135.8	5	1010.25	29998	7
10	2002	5	27	84	159	13	0.4	116.9	7	1009.66	29998	28
10	2002	6	27.4	85	116.2	18	0.4	98.3	7	1008.17	29998	76
10	2002	7	27.1	87	168	22	0.3	121.8	7	1009.26	29998	92
10	2002	8	26.9	85	236.6	24	0.5	103.5	7	1009.14	29998	41
10	2002	9	27	86	351.1	23	0.2	96.6	7	1009.9	29998	14
10	2002	10	27.1	87	264.3	21	0.3	121.2	7	1010.34	29998	6
10	2002	11	26.2	86	239.7	19	0.2	110.2	8	1009.98	29998	8
10	2002	12	25.9	84	145.4	13	0.3	105.7	7.4	1013.09	29998	3
10	2003	1	26.9	83	19.6	10	0.7	95.7	6.2	1010.07	29270	3
10	2003	2	27.5	78	4.8	1	1.1	94.6	3.3	1011.18	29270	2
10	2003	3	28.2	76	29.4	7	1.1	97.2	4.3	1010.34	29270	1
10	2003	4	28.8	75	31.7	9	1.1	168.1	3.9	1009.24	29270	0
10	2003	5	27.3	86	256.3	18	0.5	138.3	8.1	1008.75	29270	1
10	2003	6	27.4	84	128.7	15	0.6	109.4	5.9	1009.08	29270	3
10	2003	7	26.7	86	173	20	0.8	110.8	7.7	1009.75	29270	8
10	2003	8	27.1	85	188.6	16	0.7	110.7	6.9	1009.55	29270	4
10	2003	9	26.8	87	267.9	25	0.5	115.3	8.3	1010.16	29270	0
10	2003	10	26.1	89	189.6	27	0.5	78.6	8.6	1010.34	29270	2
10	2003	11	26.5	85	131.1	14	0.6	91.5	6.4	1010.49	29270	6
10	2003	12	25.5	84	280.9	8	0.7	85.1	6.5	1011.76	29270	0
10	2004	1	26.2	80	9.5	6	0.4	103.5	4.3	1011.36	28810	0
10	2004	2	26.9	77	12.3	6	0.7	119.7	5.4	1011.18	28810	0
10	2004	3	28.1	77	96.7	8	0.8	147.7	5.7	1009.97	28810	0
10	2004	4	28.3	79	64.8	8	0.7	137.9	6.2	1009.43	28810	1
10	2004	5	27.4	85	107.6	19	0.8	116.1	7.3	1008.99	28810	1
10	2004	6	26.8	85	99.2	17	0.8	103.1	7.6	1009.9	28810	1
10	2004	7	26.4	86	330.7	20	0.3	99.2	8.1	1009.31	28810	1
10	2004	8	26.7	87	177.5	24	0.5	103.8	8.1	1009.53	28810	2
10	2004	9	26.8	85	111	15	0.4	109.2	8	1010.28	28810	3
10	2004	10	26.6	85	102.3	20	0.5	95.7	8	1011.21	28810	1
10	2004	11	26.9	84	83.2	16	0.6	87.8	7.1	1010.9	28810	2
10	2004	12	26.1	81	33	5	0.7	99.4	6.1	1011.19	28810	4
10	2005	1	26.4	76	12.1	4	0.8	124.1	5.2	1011.56	26018	2
10	2005	2	27.7	71	0	0	0.9	148	3.6	1011.68	26018	3
10	2005	3	28	74	54.1	6	0.7	155.7	5	1011.27	26018	6
10	2005	4	29.5	72	9.2	7	0.8	165.5	4.9	1010.28	26018	38
10	2005	5	28	82	201.8	20	0.6	119.1	7	1008.73	26018	44
10	2005	6	27.5	85	277.1	20	0.6	106.5	7	1008.39	26018	96
10	2005	7	27.4	84	118.3	17	0.6	110.2	7.6	1009.55	26018	46
10	2005	8	27.5	83	260.7	20	0.6	117.4	7.8	1009.4	26018	20
10	2005	9	27.3	84	136.4	17	0.4	93.8	7	1009.71	26018	17
10	2005	10	26.4	88	275.9	25	0.3	92.7	8.5	1010.36	26018	12
10	2005	11	26.3	88	301	19	0.4	77.5	8	1010.32	26018	4
10	2005	12	25.2	89	352.2	21	0.4	73	8	1010.36	26018	1
10	2006	1	26.4	81	80.8	11	0.5	105	6	1010.92	28887	1
10	2006	2	27	79	139.2	12	0.6	143.9	5	1011.15	28887	0
10	2006	3	28.1	76	31.1	6	0.6	141.3	5	1009.62	28887	0
10	2006	4	27.9	81	164.2	15	0.4	126.5	6	1009.12	28887	1
10	2006	5	27	86	215.2	22	0.4	110	7	1009.54	28887	2
10	2006	6	27.3	85	317.7	18	0.3	127.3	7	1009.14	28887	0
10	2006	7	26.9	86	211.7	24	0.5	83.1	8	1009.54	28887	1
10	2006	8	26.9	85	248.7	19	0.6	122.2	7	1009.5	28887	0
10	2006	9	26.9	85	297.9	20	0.5	123.4	7	1010.37	28887	0
10	2006	10	26.5	87	146.8	22	0.3	88.8	7	1011.43	28887	0
10	2006	11	26.7	85	82.3	20	0.3	89.4	6	1010.33	28887	0
10	2006	12	26.5	81	30.6	12	0.9	96.8	6	1011.01	28887	0
10	2007	1	26.1	80	25.8	9	0.7	94.9	6	1012.25	28876	0
10	2007	2	26.9	73	24.7	2	0.6	131.1	5	1011.35	28876	0
10	2007	3	27.7	75	129.5	11	0.5	160.3	6	1010.01	28876	0
10	2007	4	28.1	80	111.4	14	0.5	128.7	6	1009.7	28876	0
10	2007	5	27.5	85	287.1	19	0.4	107.1	7	1009.19	28876	3
10	2007	6	27.7	85	160.5	20	0.5	106.4	7	1007.91	28876	8
10	2007	7	26.8	87	250.4	24	0.5	93	8	1009.21	28876	3
10	2007	8	26.9	85	232.2	20	0.7	109.9	8	1009.13	28876	5
10	2007	9	26.9	86	310.9	21	0.5	99	7	1009.32	28876	2
10	2007	10	25.9	90	281.3	30	0.4	83.9	8	1009.84	28876	1
10	2007	11	25.8	87	168.8	15	0.4	87.2	7	1010.17	28876	4
10	2007	12	26.2	82	87.5	11	0.8	94.5	6	1010.1	28876	0
10	2008	1	26.4	82	40.6	8	0.4	94.9	5	1010.7	28926	1
10	2008	2	26.4	78	44.3	4	0.7	113.1	6	1011.17	28926	1
10	2008	3	27.2	79	61.5	12	0.7	130	5	1009.65	28926	0
10	2008	4	27.3	82	114.4	15	0.5	108.4	6	1008.57	28926	2
10	2008	5	26.9	86	267.2	22	0.5	116.4	7	1009.08	28926	3
10	2008	6	26.9	86	188.3	21	0.5	94.9	7	1009.3	28926	7
10	2008	7	27.1	85	142.2	19	0.5	101.7	7	1009.19	28926	8
10	2008	8	27.3	83	144.6	19	0.4	118.5	6	1009.06	28926	6
10	2008	9	26.6	86	208.1	20	0.6	91.2	7	1009.99	28926	5
10	2008	10	26.9	87	106.5	22	0.3	100.2	7	1010.05	28926	0
10	2008	11	26.1	88	279.3	18	0.5	74.6	8	1009.61	28926	4
10	2008	12	25.6	84	47.5	12	0.5	77.2	7	1010.81	28926	0
10	2009	1	25.3	80	31.3	4	0.8	97.2	5	1012.13	29033	0
10	2009	2	27.4	76	14.1	3	0.6	116.5	5	1010.02	29033	1
10	2009	3	27.5	80	172.8	17	0.5	129.1	6	1010.01	29033	2
10	2009	4	27.5	83	94	16	0.4	115.9	6	1009.3	29033	0
10	2009	5	27.3	85	194.7	20	0.5	93.7	7	1008.34	29033	12
10	2009	6	27.8	82	87	11	0.8	111	6	1009.13	29033	9
10	2009	7	27.3	84	163.8	15	0.7	104.7	7	1009.4	29033	0
10	2009	8	27.2	85	339.1	22	0.6	113.3	7	1009.13	29033	0
10	2009	9	26.8	86	218.8	20	0.7	101.9	7	1009.88	29033	0
10	2009	10	26.7	86	196.4	21	0.6	105.8	7	1009.94	29033	0
10	2009	11	26.5	85	164.6	13	0.5	95.3	6	1009.75	29033	0
10	2009	12	26.3	81	18	8	0.5	100	5	1011.24	29033	4
10	2010	1	26.7	79	11	6	0.6	106.4	5	1011.71	29187	3
10	2010	2	27.8	73	53.5	3	0.9	136.3	4	1011.06	29187	7
10	2010	3	28.5	74	58	6	0.6	162.1	5	1010.68	29187	10
10	2010	4	28.9	77	87.3	9	0.6	160.1	5	1009.69	29187	17
10	2010	5	29	81	116.6	13	0.4	127.2	6	1007.78	29187	13
10	2010	6	27.3	85	191.9	20	0.4	105.3	7	1009.14	29187	45
10	2010	7	26.8	86	218.6	21	0.3	100.2	7	1009	29187	32
10	2010	8	27.1	85	156.4	18	0.5	101	7	1009.03	29187	13
10	2010	9	27.1	86	268.4	27	0.2	112	7	1009.13	29187	4
10	2010	10	26.5	87	291.5	23	0.3	90.1	7	1008.8	29187	6
10	2010	11	25.9	89	344	25	0.1	58.4	8	1009.24	29187	1
10	2010	12	25.9	87	217.5	17	0.3	72.5	7	1008.8	29187	0
10	2011	1	25.6	85	200.6	20	0.4	82.3	7	1010.15	29304	0
10	2011	2	27.2	77	54.6	7	0.6	106.4	5	1010.04	29304	1
10	2011	3	26.4	85	511.1	18	0.4	77.1	6	1009.2	29304	5
10	2011	4	27.6	82	109.1	12	0.4	99.7	6	1009.53	29304	1
10	2011	5	27.7	84	158.6	18	0.4	117.3	6	1009.15	29304	3
10	2011	6	27.4	86	105.9	19	0.5	79.6	7	1008.6	29304	2
10	2011	7	26.8	86	195.5	17	0.4	87	7	1008.85	29304	3
10	2011	8	26.9	85	235.8	19	0.4	108.8	7	1009.45	29304	0
10	2011	9	26.5	87	245.2	17	0.4	88.6	7	1009.96	29304	0
10	2011	10	26.6	87	112.2	20	0.3	79.2	7	1009.71	29304	0
10	2011	11	26.6	87	194.3	17	0.3	86.3	7	1009.54	29304	1
10	2011	12	26	86	172.9	15	0.6	72	6	1010.32	29304	0
10	2012	1	26.3	84	165.3	13	0.7	75.1	6	1010.34	29310	2
10	2012	2	27.4	78	27.6	8	0.4	115.4	5	1009.26	29310	1
10	2012	3	27.6	80	78.6	12	0.5	124.8	6	1009.55	29310	1
10	2012	4	27.6	83	180	17	0.4	99	6	1009.6	29310	1
10	2012	5	27.3	86	273.5	18	0.3	85.9	6	1008.53	29310	2
10	2012	6	27.4	83	165.6	11	0.5	88.6	6	1008.84	29310	8
10	2012	7	27.2	85	234.6	16	0.3	88.3	7	1008.79	29310	1
10	2012	8	27.4	83	229.5	14	0.4	97.9	6	1009.7	29310	0
10	2012	9	26.4	87	233.2	25	0.2	75.5	7	1010.3	29310	4
10	2012	10	26.7	86	209.3	18	0.1	89.9	6	1010.46	29310	5
10	2012	11	27	87	114.4	16	0.1	75	6	1009.97	29310	5
10	2012	12	26.6	86	138.4	13	0.2	75.2	6	1010	29310	10
10	2013	1	26.8	82	36.4	8	0.5	97.1	6	1011.58	29461	10
10	2013	2	26.9	80	70	8	0.5	95.4	6	1010.66	29461	17
10	2013	3	28.6	77	20.3	3	0.3	150.2	4	1010.59	29461	16
10	2013	4	28.3	81	124.4	13	0.3	110.6	6	1009.05	29461	15
10	2013	5	27.9	84	241.4	19	0.2	105.5	6	1008.93	29461	20
10	2013	6	27.4	85	230.7	19	0.8	85.1	7	1007.85	29461	37
10	2013	7	26.6	87	212.8	18	0.7	73.6	7	1008.74	29461	21
10	2013	8	26.8	85	198.6	19	0.8	101.3	6	1009.25	29461	14
10	2013	9	26.9	86	167.9	18	1	92.4	7	1009.51	29461	1
10	2013	10	26.4	87	140.4	22	0.6	88.2	7	1010.66	29461	0
10	2013	11	26.6	86	275.4	17	0.5	82	6	1009.34	29461	0
10	2013	12	25.9	84	108.9	8	0.6	90.6	6	1010.48	29461	0
10	2014	1	25.6	78	21.3	5	0.9	104.3	5	1012.5	29463	1
10	2014	2	26.7	70	0	0	1.1	147.6	3	1010.67	29463	0
10	2014	3	27.8	71	19.8	3	1.7	171.6	3	1010.82	29463	0
10	2014	4	28	81	200.5	14	1	129.5	6	1009.78	29463	0
10	2014	5	27.7	85	183.3	19	0.7	107.6	6	1009.19	29463	2
10	2014	6	27.5	86	167.7	16	0.9	85.1	6	1007.99	29463	1
10	2014	7	27.1	86	233.1	24	0.8	90.5	7	1009.15	29463	2
10	2014	8	26.8	86	343.8	23	0.6	85.1	7	1009.91	29463	7
10	2014	9	26.9	86	193.9	19	0.6	87.1	7	1010.24	29463	6
10	2014	10	26.5	88	210.8	21	0.7	89.7	7	1010.43	29463	3
10	2014	11	26.6	88	218.3	19	0.5	78.3	7	1010.17	29463	4
10	2014	12	26.3	87	187.1	19	0.8	80.2	6	1010.62	29463	3
10	2015	1	26.1	80	14.4	4	1.1	102.2	4	1012.26	29591	4
10	2015	2	26.2	75	2.3	2	1.1	119	3	1011.97	29591	6
10	2015	3	28.2	73	4.8	1	1.1	156.1	3	1011.47	29591	2
10	2015	4	28.5	78	57.7	10	0.9	125.1	5	1009.86	29591	6
10	2015	5	28.2	83	128.7	22	0.7	131.3	6	1009.75	29591	1
10	2015	6	27.7	85	167.2	14	0.7	85.5	6	1009.39	29591	13
10	2015	7	27.2	87	267.7	23	0.8	112.9	7	1009.7	29591	5
[truncated: 2,693 more rows]
